# Supplementary material for: Exploring transcriptomic diversity in muscle revealed that cellular signaling pathways mainly differentiate five Western porcine breeds
Source: BMC Genomics. 2015 Dec 12;16:1055. doi: 10.1186/s12864-015-2259-9 (PMC4676870; doi:10.1186/s12864-015-2259-9)
Supplement: Additional file 1: — 1,859 genes were identified to be differentially expressed between five breeds according to statistical analysis. 1,703 were differentially expressed with a linear mixed model (FDR < 0.1 %, column Pval. Breed.effect. BHcorrection) and 1,655 are declared differentially expressed between breeds with a pairwise analysis (FDR < 0.1 %; FDR < 5 % only for LWM compared to LWF, columns E to Y). This additional file corresponds to the analysis not restricted to autosomes. DU: Duroc; LWF: Large White dam line; LWM: Large White sire line; LR: Landrace; PI: Piétrain. (XLSX 515 kb) [file 12864_2015_2259_MOESM1_ESM.xlsx]

## Sheet: Additional file 1
Additional file 1 – 1,858 probes were identified to be differentially expressed between five breeds according to a statistical analysis. 1,703 are differentially expressed with a linear mixed model (column Pval.Breed.effect.BHcorrection; BH < 0.1%) and 1,655 are declared differentially expressed between breeds with a pairwise analysis (columns E to Y; BH < 0.1%; BH<5% only for LWM compared to LWF…
ID	Gene annotation	Pval.Breed.effect.BHcorrection	DU-LR	DU-LWF	DU-LWM	DU-PI	LR-LWF	LR-LWM	LR-PI	LWF-LWM	LWF-PI	LWM-PI	DU-LR	DU-LWF	DU-LWM	DU-PI	LR-LWF	LR-LWM	LR-PI	LWF-LWM	LWF-PI	LWM-PI	Total
22274	TC277330	0	0.791288	6.62683e-10	2.11524e-06	1.67089e-05	6.66407e-12	3.51495e-06	6.87875e-06	0.82834	0.0291785	0.0904845	0	1	1	1	1	1	1	0	0	0	6
39988	BW977767	0	0.0180076	0.267229	0.824268	0	1.3255e-06	0.521762	6.12537e-09	0.538005	0	1.04542e-06	0	0	0	1	1	0	1	0	1	1	5
23407	AQP1	0	0.000733639	0.97377	0.896171	2.09104e-09	2.13559e-05	0.0171911	0.0174827	0.931308	1.0554e-12	9.98732e-06	1	0	0	1	1	0	0	0	1	1	5
7762	IGF2	0	3.98804e-09	0.127629	0.392045	0.168449	0	3.89377e-09	0	0.979263	0.770826	0.876851	1	0	0	0	1	1	1	0	0	0	4
21526	EIF2S3	0	0.924457	0.540628	0.90905	8.3261e-09	0.420205	0.881395	0	0.715253	0	4.63652e-05	0	0	0	1	0	0	1	0	1	1	4
40263	OCA2	0	0	0	0	0	0.0237658	0.083847	0.239843	0.778032	0.3171	0.221767	1	1	1	1	0	0	0	0	0	0	4
27309	VDR	0	8.57509e-12	0	4.11604e-12	0	0.148372	0.160586	0.428372	0.711404	0.591018	0.254081	1	1	1	1	0	0	0	0	0	0	4
20217	PSMB4	0	6.86007e-13	0	7.52778e-10	0	0.245298	0.78442	0.835028	0.988024	0.415282	0.754863	1	1	1	1	0	0	0	0	0	0	4
5055	NAA20	0	0.148335	0.933083	0.544749	1.80354e-09	0.0178872	0.961537	5.54019e-09	0.732435	0	0.000752229	0	0	0	1	0	0	1	0	1	1	4
18574	DDX3Y	0	0.540505	0.61354	0.995784	0	0.868723	0.823781	0	0.865521	0	0	0	0	0	1	0	0	1	0	1	1	4
7533	USP9Y	0	0.412335	0.974155	0.973298	0	0.146658	0.802659	0	0.966914	0	0	0	0	0	1	0	0	1	0	1	1	4
32184	DN115302	0	3.25014e-05	0.00197946	0.00274611	0.166407	0.239643	0.961345	1.77555e-12	0.708178	2.28265e-09	7.61553e-06	1	0	0	0	0	0	1	0	1	1	4
11878	IGF2	0	3.91648e-10	0.175018	0.350083	0.263061	0	6.89666e-10	0	0.931204	0.689253	0.736358	1	0	0	0	1	1	1	0	0	0	4
10512	IGF2	0	1.01529e-11	0.224728	0.126738	0.244646	0	2.74403e-12	0	0.758261	0.826226	0.427568	1	0	0	0	1	1	1	0	0	0	4
40524	ZRSR2	0	0.357046	0.306606	0.97024	2.16792e-08	0.987993	0.764032	0	0.790856	0	3.6047e-05	0	0	0	1	0	0	1	0	1	1	4
8489	EIF1AY	0	0.622964	0.874234	0.96783	0	0.151223	0.906528	0	0.912232	0	0	0	0	0	1	0	0	1	0	1	1	4
36020	DPH5	0	0.526728	0.716372	0.982532	6.3852e-09	0.750665	0.788129	0	0.885103	0	0.00016472	0	0	0	1	0	0	1	0	1	1	4
16335	IGF2	0	5.86764e-10	0.225187	0.412358	0.304906	0	2.60545e-09	0	0.941867	0.726731	0.780618	1	0	0	0	1	1	1	0	0	0	4
3404	RAB18	0	0.745285	0	0.00115545	0.840115	0	0.00715695	0.782104	0.344653	0	0.000798094	0	1	0	0	1	0	0	0	1	1	4
6447	USP9Y	0	0.72937	0.921989	0.896357	0	0.373088	0.755006	0	0.953389	0	0	0	0	0	1	0	0	1	0	1	1	4
31039	IGF2	0	2.14948e-08	0.313069	0.199938	0.466259	0	6.89666e-10	0	0.786569	0.656481	0.402686	1	0	0	0	1	1	1	0	0	0	4
36089	SLC39A9	0	4.70405e-12	0.67052	0.00325862	5.89728e-06	2.49457e-13	0.41506	0.00218716	0.0896832	7.35561e-06	0.896987	1	0	0	1	1	0	0	0	1	0	4
362	IGF2	0	1.13387e-09	0.196452	0.479166	0.375182	0	7.88862e-09	0	0.979444	0.563099	0.797338	1	0	0	0	1	1	1	0	0	0	4
2093	IGF2	0	3.18274e-07	0.43584	0.522345	0.481219	2.49457e-13	1.61584e-06	2.74403e-12	0.91964	0.819011	0.771727	1	0	0	0	1	1	1	0	0	0	4
7443	KCNA5	0	0.0651363	0.721295	0.287872	9.17149e-06	0.071228	0.00494837	0	0.275275	5.9271e-10	0.305076	0	0	0	1	0	0	1	0	1	0	3
2400	PPARGC1B	0	0.614248	0.438753	0.0675795	2.58968e-11	0.880135	0.308354	3.03036e-11	0.533828	2.35032e-11	0.0551531	0	0	0	1	0	0	1	0	1	0	3
29104	TC278765	0	4.10925e-09	0	0.00628052	3.04892e-13	0.0280507	0.666994	0.151163	0.159034	0.534108	0.0827949	1	1	0	1	0	0	0	0	0	0	3
20447	RBL2	4.42585e-14	0.258065	1.30048e-08	1.4961e-06	0.160049	1.26746e-07	0.000178519	0.99204	0.708391	1.99565e-07	8.51504e-05	0	1	1	0	1	1	0	0	1	1	6
31225	FBP2	4.42585e-14	0.0181636	3.17407e-05	0.00149608	1.82935e-12	0.153473	0.393188	2.73053e-07	0.853371	0.000285688	0.294265	0	1	0	1	0	0	1	0	1	0	4
41220	USP9Y	4.42585e-14	0.705633	0.791743	0.992153	2.63244e-08	0.870933	0.89116	2.13424e-12	0.91964	1.17601e-12	0.00031868	0	0	0	1	0	0	1	0	1	1	4
12647	A_72_P031846	4.42585e-14	0.090595	0.000810535	0.344184	0.00341413	2.49457e-13	0.00755924	1.23583e-10	0.771046	0.67455	0.759384	0	1	0	0	1	0	1	0	0	0	3
35123	LCMT1	8.31523e-14	0.012407	2.61102e-05	0.0147897	0.218865	0.169978	0.790787	5.28363e-08	0.985857	1.46348e-12	9.0953e-05	0	1	0	0	0	0	1	0	1	1	4
10677	TBC1D7	8.31523e-14	4.69737e-08	0.000870072	0.00326006	8.23208e-13	0.00786333	0.834499	0.0507959	0.782162	5.72634e-07	0.113705	1	1	0	1	0	0	0	0	1	0	4
32734	TMEM47	1.17601e-13	0.36108	9.46763e-09	5.8438e-05	0.830838	1.31589e-06	0.00408613	0.301756	0.90741	8.06548e-11	5.05554e-05	0	1	1	0	1	0	0	0	1	1	5
22367	TC283981	1.17601e-13	0.055642	0.000418198	0.302221	0.0642621	6.54345e-12	0.00570294	0.750237	0.796571	1.84242e-11	0.00494865	0	1	0	0	1	0	0	0	1	0	3
8990	EMC2	1.48326e-13	6.4951e-08	2.28669e-12	4.1076e-08	9.1856e-08	0.138823	0.331985	0.87964	0.821745	0.0642737	0.129459	1	1	1	1	0	0	0	0	0	0	4
36524	KCNE3	1.48326e-13	0.00632709	0.576222	0.481687	0.00100309	0.0134276	0.00303052	0	0.391477	2.21573e-07	0.516825	0	0	0	0	0	0	1	0	1	0	2
28688	RNGTT	1.80528e-13	0.837178	0.878062	0.913303	5.2403e-08	0.903983	0.835768	1.27748e-09	0.865521	1.09477e-10	3.29739e-05	0	0	0	1	0	0	1	0	1	1	4
40058	TC268295	2.46259e-13	0.000850357	6.66993e-06	4.63446e-06	1.49674e-12	0.439351	0.11631	1.24e-06	0.484551	8.40701e-05	0.822453	1	1	1	1	0	0	1	0	1	0	6
14486	TJP2	5.14505e-13	0	1.42461e-07	2.07865e-05	3.47039e-11	0.000124392	0.672499	0.467731	0.778703	0.0109702	0.797338	1	1	1	1	1	0	0	0	0	0	5
36488	USP9X	5.88006e-13	0.866681	0.890509	0.769518	9.40918e-07	0.424212	0.68064	1.03298e-09	0.885731	1.54352e-12	9.98732e-06	0	0	0	1	0	0	1	0	1	1	4
16985	PIK3CG	5.88006e-13	0.660993	0.136011	0.768846	4.09649e-09	0.308693	0.991651	5.05371e-10	0.859636	2.08278e-07	0.000629673	0	0	0	1	0	0	1	0	1	1	4
11113	LPIN1	7.33868e-13	0.300537	0.144869	0.00526057	2.4063e-11	0.840785	0.147978	5.72596e-09	0.374406	6.21353e-09	0.340072	0	0	0	1	0	0	1	0	1	0	3
6211	SRP19	8.41917e-13	0.0624484	0.00259081	0.318642	0.0406046	9.14676e-13	0.00466147	1.1624e-08	0.840919	0.297797	0.992013	0	0	0	0	1	0	1	0	0	0	2
9965	MAST4	8.84187e-13	1.80882e-05	1.18385e-10	0.000226709	0.0392993	0.0217031	0.809735	0.00287967	0.883512	6.7065e-08	0.0313064	1	1	1	0	0	0	0	0	1	0	4
25459	LBR	9.54444e-13	1.99438e-05	0.114251	0.59668	0.579787	2.49457e-13	0.000105424	2.25958e-09	0.945728	0.188455	0.783927	1	0	0	0	1	1	1	0	0	0	4
20933	KDM6A	1.28444e-12	0.918597	0.85716	0.507468	5.57483e-08	0.954479	0.699726	1.24522e-10	0.75925	8.06548e-11	0.0116366	0	0	0	1	0	0	1	0	1	0	3
16138	MPEG1	1.34343e-12	0.914218	0.00178864	0.595775	7.93833e-08	0.000150959	0.774303	1.05856e-10	0.635971	0.00578585	0.00704028	0	0	0	1	1	0	1	0	0	0	3
11863	MOB3C	1.39945e-12	0.188293	0.204145	0.729182	4.75547e-05	0.923891	0.924078	4.80754e-11	0.931204	1.59154e-11	0.000636295	0	0	0	1	0	0	1	0	1	1	4
21806	ATP2B1	1.39945e-12	0.855987	0.0287134	0.409502	0.000119434	0.0385056	0.676537	1.2191e-06	0.94149	2.49457e-13	8.51504e-05	0	0	0	1	0	0	1	0	1	1	4
23303	CXorf15	2.17908e-12	0.808336	0.977361	0.417546	5.08909e-07	0.70661	0.713027	4.38318e-10	0.635971	1.77264e-09	1.72849e-06	0	0	0	1	0	0	1	0	1	1	4
31647	AKR7A2	2.18994e-12	1.01529e-11	1.34233e-09	4.97641e-05	2.58968e-11	0.395161	0.941979	0.770195	0.943086	0.607755	0.971577	1	1	1	1	0	0	0	0	0	0	4
29810	C17orf91	2.71814e-12	0.100066	0.00262367	0.000116823	2.59094e-10	0.29718	0.0337765	1.58929e-07	0.323846	3.81881e-05	0.886465	0	0	1	1	0	0	1	0	1	0	4
35672	LPIN1	2.9981e-12	0.981386	0.00370152	0.00248437	1.84219e-08	0.000652243	0.00408613	1.5522e-10	0.655312	0.00307795	0.845553	0	0	0	1	1	0	1	0	0	0	3
26698	TYW3	3.74186e-12	0.955307	1.11593e-05	0.043493	0.956685	1.70714e-09	0.033023	0.969541	0.86386	8.23892e-09	0.0157471	0	1	0	0	1	0	0	0	1	0	3
24425	C1QA	3.96904e-12	0.461071	0.20401	0.665609	1.84219e-08	0.722701	0.994792	2.51018e-08	0.949732	1.99565e-07	0.00274539	0	0	0	1	0	0	1	0	1	0	3
7152	EW526293	4.26046e-12	0.000144407	0.5829	0.455079	2.52789e-05	6.43939e-09	0.434866	0.980749	0.374626	8.91943e-10	0.241454	1	0	0	1	1	0	0	0	1	0	4
14895	RPS25	5.91385e-12	0.00143912	0.0455051	0.0759871	0.193746	2.59768e-11	1.90372e-06	9.5843e-09	0.817105	0.38944	0.334342	0	0	0	0	1	1	1	0	0	0	3
22049	PRKACB	6.20894e-12	0.792463	1.22753e-06	0.386214	0.718531	6.64192e-10	0.262512	0.956456	0.42124	1.3667e-10	0.152055	0	1	0	0	1	0	0	0	1	0	3
32260	AY610089	6.24266e-12	0.0091372	0.27555	0.774997	0.000379433	3.95977e-07	0.030606	1.71502e-13	0.936886	0.0197194	0.184979	0	0	0	1	1	0	1	0	0	0	3
7356	TC263835	6.79259e-12	0.677346	0.798393	0.766467	3.65963e-07	0.212933	0.984737	4.52764e-11	0.736391	5.55275e-08	5.12887e-05	0	0	0	1	0	0	1	0	1	1	4
37789	NSD1	7.14775e-12	0.368783	0.962369	0.24014	7.93833e-08	0.123366	0.803958	4.51167e-06	0.421456	4.53313e-11	0.113705	0	0	0	1	0	0	1	0	1	0	3
34630	MFAP5	7.25207e-12	0.643745	0.0388583	0.808187	0.000164325	0.144125	0.997126	1.63381e-07	0.754345	6.86007e-13	0.00302495	0	0	0	1	0	0	1	0	1	0	3
32216	USP9X	9.73272e-12	0.963661	0.661222	0.964983	1.50307e-05	0.318488	0.992461	8.4569e-09	0.817105	5.48805e-12	0.00363311	0	0	0	1	0	0	1	0	1	0	3
7759	ATG7	1.09128e-11	1.09761e-12	1.1516e-07	0.0675795	9.89557e-07	0.0298867	0.0383427	0.0032856	0.659656	0.631854	0.602677	1	1	0	1	0	0	0	0	0	0	3
32773	ATG7	1.10593e-11	6.86007e-13	1.93361e-07	0.0255507	3.76997e-07	0.0171322	0.0926443	0.00557745	0.801694	0.870344	0.723786	1	1	0	1	0	0	0	0	0	0	3
24242	ATG7	1.86348e-11	1.82935e-12	1.84641e-07	0.106692	8.23386e-07	0.0311571	0.0260498	0.00590928	0.610261	0.739582	0.465424	1	1	0	1	0	0	0	0	0	0	3
27955	Cfi	1.9531e-11	0.307784	0.163555	0.779707	2.5397e-05	0.000324892	0.327903	0.00384271	0.886069	2.09837e-12	0.000682457	0	0	0	1	1	0	0	0	1	1	4
20713	C4BPA	2.44179e-11	0.0681488	0.718882	0.773664	0.000108478	0.100181	0.766311	4.93925e-12	0.950993	7.74776e-08	0.00167257	0	0	0	1	0	0	1	0	1	0	3
9875	AJ956667	4.05332e-11	0.021941	0.000149214	0.183548	0.361989	0.26484	0.995876	2.74226e-06	0.798542	5.9271e-10	0.0124694	0	1	0	0	0	0	1	0	1	0	3
15722	WIPI1	4.07546e-11	0.306352	0.578718	0.973619	3.57044e-05	0.00466447	0.598302	9.53876e-12	0.887572	4.48845e-05	0.00894687	0	0	0	1	0	0	1	0	1	0	3
4258	SCARB2	4.41331e-11	0.338363	1.51566e-06	0.00592183	1.4663e-09	0.000257262	0.139754	2.39042e-07	0.982956	0.212006	0.584667	0	1	0	1	1	0	1	0	0	0	4
16374	MFAP5	5.17606e-11	0.898164	0.20401	0.929934	0.000260581	0.184194	0.995711	1.80437e-06	0.790856	7.56718e-11	0.00789673	0	0	0	1	0	0	1	0	1	0	3
37574	MRC1	5.69571e-11	0.213833	0.962369	0.729071	0.000173646	0.0873473	0.930161	1.24522e-10	0.82834	2.01116e-06	0.00100157	0	0	0	1	0	0	1	0	1	0	3
22557	TXLNG	5.81057e-11	0.870303	0.745134	0.92174	2.20258e-06	0.915036	0.997738	7.88034e-09	0.983114	3.36572e-10	0.000787555	0	0	0	1	0	0	1	0	1	1	4
20724	CF179162	5.81057e-11	0.143785	0.853562	0.804415	4.68509e-05	0.121603	0.834499	1.82104e-11	0.923306	1.25616e-07	0.00131231	0	0	0	1	0	0	1	0	1	0	3
11928	Hnrnpa3	5.81057e-11	1.39655e-06	0.518094	0.114396	0.842232	6.45729e-08	0.420286	1.4013e-09	0.571029	0.468026	0.109341	1	0	0	0	1	0	1	0	0	0	3
7793	TCP11L2	6.24618e-11	0.842305	2.36123e-05	0.586204	0.581974	7.15162e-11	0.45519	0.155324	0.310492	4.64176e-06	0.798406	0	1	0	0	1	0	0	0	1	0	3
27383	TC249190	6.87917e-11	0.126031	0.692076	0.558623	5.42541e-09	0.204404	0.96318	1.60553e-05	0.855409	9.47343e-10	0.00800887	0	0	0	1	0	0	1	0	1	0	3
5556	DN132968	7.64726e-11	0.746963	0.284523	0.356689	3.60457e-07	0.440002	0.689699	7.91178e-09	0.892217	8.6508e-07	0.0514437	0	0	0	1	0	0	1	0	1	0	3
28742	LMBR1	8.72499e-11	0.407159	2.21904e-06	0.466986	0.439476	0.000187614	0.939475	0.0130718	0.374626	1.24203e-11	0.109341	0	1	0	0	1	0	0	0	1	0	3
11292	ARPC2	1.06716e-10	0.922513	0.483881	0.765711	5.97245e-06	0.504791	0.751963	7.37735e-08	0.57551	4.43618e-11	0.0445178	0	0	0	1	0	0	1	0	1	0	3
41276	arhgap18	1.25465e-10	0.622127	0.987892	0.939161	5.88919e-07	0.403747	0.939194	1.12613e-06	0.953328	8.91943e-10	0.00199288	0	0	0	1	0	0	1	0	1	0	3
6921	ZIC1	1.26029e-10	0.395906	0.980678	0.678854	7.3327e-07	0.114115	0.993667	4.55747e-06	0.768602	1.26317e-10	0.0125658	0	0	0	1	0	0	1	0	1	0	3
40954	GZMB	1.44836e-10	0.333445	8.18996e-05	0.0956222	0.900738	1.80622e-10	0.00584551	0.0782863	0.884369	3.11152e-06	0.0744083	0	1	0	0	1	0	0	0	1	0	3
15632	FNTB	1.45338e-10	0.849202	5.97583e-07	0.000534359	0.0140546	7.15587e-08	0.00210245	0.0192233	0.915766	0.00332131	0.0740973	0	1	1	0	1	0	0	0	0	0	3
22045	EFHA2	1.79923e-10	0.00491229	0.0329376	0.168915	3.04587e-10	0.491312	0.962417	0.000432232	0.945728	2.53713e-06	0.0349936	0	0	0	1	0	0	1	0	1	0	3
42455	HNRNPH3	1.90201e-10	0.427529	3.69312e-08	0.00167378	0.000111301	4.66964e-07	0.0449961	0.00303183	0.931308	0.0535621	0.627978	0	1	0	1	1	0	0	0	0	0	3
11195	POLR3E	1.90201e-10	7.37415e-05	0.0136925	0.044105	2.58968e-11	0.141599	0.951145	0.0092954	0.840026	2.64913e-06	0.104226	1	0	0	1	0	0	0	0	1	0	3
22386	PIR	1.92981e-10	0.0653117	0.263209	0.855812	1.38368e-09	0.486579	0.667253	2.83419e-05	0.883512	6.3268e-08	0.00046464	0	0	0	1	0	0	1	0	1	1	4
32921	TC282582	2.02772e-10	0.292652	0.81274	0.869554	1.63471e-05	0.0139735	0.389766	0.000448457	0.978857	5.9271e-10	0.000427726	0	0	0	1	0	0	1	0	1	1	4
24710	TC251637	2.40952e-10	2.92871e-06	5.21583e-05	0.00118022	0.473886	0.445155	0.974393	1.61872e-06	0.805836	7.97845e-05	0.00426817	1	1	0	0	0	0	1	0	1	0	4
19838	TC283583	2.45443e-10	0.921853	0.970436	0.721106	2.60743e-06	0.899406	0.702329	4.12743e-07	0.792126	3.0995e-08	7.71293e-05	0	0	0	1	0	0	1	0	1	1	4
3335	PARD3	2.49923e-10	7.91123e-05	0.027449	0.801677	7.06961e-10	0.0855689	0.120116	0.0431474	0.728764	1.1237e-05	0.000564832	1	0	0	1	0	0	0	0	1	1	4
19315	TC263520	2.49923e-10	0.909635	0.878128	0.87625	1.16591e-06	0.605971	0.852191	3.98093e-07	0.959776	8.91943e-10	0.000331881	0	0	0	1	0	0	1	0	1	1	4
31939	CHM	2.79562e-10	0.933687	0.0874803	0.849068	1.50106e-06	0.0237148	0.950286	1.25857e-09	0.754345	0.000138087	0.00377346	0	0	0	1	0	0	1	0	1	0	3
3096	TJP2	3.18194e-10	4.10925e-09	0.000298434	0.00149608	1.90256e-09	0.000384463	0.74808	0.851391	0.758261	0.000226347	0.500796	1	1	0	1	1	0	0	0	1	0	5
29847	Ttc7b	3.39195e-10	0.877067	0.00241028	0.181783	0.000201922	3.41729e-07	0.106594	9.5843e-09	0.91819	0.423814	0.583826	0	0	0	1	1	0	1	0	0	0	3
23473	LCLAT1	3.45831e-10	0.656311	0.286489	0.894153	0.000445041	0.00231268	0.971666	0.000262068	0.561633	2.3449e-11	0.0489213	0	0	0	1	0	0	1	0	1	0	3
30777	CDC16	3.56161e-10	6.49727e-05	6.26248e-10	0.00311758	2.00405e-09	0.0149836	0.967276	0.00518833	0.725815	0.721228	0.36869	1	1	0	1	0	0	0	0	0	0	3
33125	LAMC1	3.68012e-10	0.233158	0.775386	0.748324	2.45781e-07	0.188951	0.914978	4.53862e-06	0.920051	8.7094e-10	0.00393097	0	0	0	1	0	0	1	0	1	0	3
9053	HNRNPH3	3.69368e-10	0.622115	1.94094e-07	0.00336222	0.000346633	1.67689e-07	0.0354322	0.00144865	0.934138	0.0650627	0.648744	0	1	0	1	1	0	0	0	0	0	3
8679	RPS6KA1	5.46381e-10	0.529947	0.0327396	0.843517	0.000325175	3.20135e-06	0.526547	1.09596e-09	0.655312	0.131986	0.0658627	0	0	0	1	1	0	1	0	0	0	3
9793	STAC	6.2486e-10	0.895065	0.588885	0.701	1.85788e-05	0.627051	0.637784	1.47568e-07	0.558191	3.05892e-06	6.91236e-05	0	0	0	1	0	0	1	0	1	1	4
1255	KIT	6.55287e-10	3.25014e-05	7.77066e-09	6.46316e-06	7.61861e-06	0.165589	0.341435	0.990372	0.816844	0.142333	0.189452	1	1	1	1	0	0	0	0	0	0	4
1037	PCM1	7.37923e-10	0.411112	0.00187082	0.168915	0.0302116	1.00444e-09	0.015219	2.79781e-06	0.91964	0.325702	0.911892	0	0	0	0	1	0	1	0	0	0	2
5217	DY424362	8.1241e-10	0.0220866	0.367288	0.695182	7.21241e-05	6.31056e-06	0.702329	0.278308	0.484551	5.03404e-10	0.153526	0	0	0	1	1	0	0	0	1	0	3
9980	TC294116	8.1241e-10	1.47193e-08	7.77066e-09	0.00275669	1.72144e-06	0.955377	0.848837	0.256227	0.861612	0.257234	0.960135	1	1	0	1	0	0	0	0	0	0	3
43368	USP9X	8.46482e-10	0.816566	0.491387	0.871441	0.000480954	0.640264	0.994336	6.90291e-08	0.936736	9.95954e-10	0.00377346	0	0	0	1	0	0	1	0	1	0	3
17143	FBXW2	8.65354e-10	0.00769607	0.00824071	0.445664	0.227732	0.845187	0.763816	3.13898e-08	0.830618	7.74524e-08	0.0401588	0	0	0	0	0	0	1	0	1	0	2
31996	AK234053	9.32749e-10	0.938147	0.841537	0.727825	0.000148452	0.894721	0.853575	4.78681e-07	0.885103	6.73088e-08	0.000564832	0	0	0	1	0	0	1	0	1	1	4
4741	TC249487	9.32749e-10	0.000145403	0.000329657	0.0115956	0.950335	0.729816	0.993667	1.0159e-06	0.920423	5.86454e-06	0.00613953	1	1	0	0	0	0	1	0	1	0	4
30557	LMBRD1	1.17488e-09	0.727648	9.77201e-06	0.0203732	0.000696951	1.38664e-07	0.0912579	0.000131414	0.923979	0.388401	0.931912	0	1	0	1	1	0	1	0	0	0	4
33615	AK240044	1.18602e-09	2.22598e-08	0.000754693	2.28828e-06	0.000521256	0.0146785	0.701574	0.00879169	0.145963	0.961568	0.0166988	1	1	1	1	0	0	0	0	0	0	4
44526	KATNAL1	1.19527e-09	0.427529	5.7022e-07	0.722809	0.98923	3.78423e-05	0.993667	0.216432	0.145129	1.81818e-09	0.650209	0	1	0	0	1	0	0	0	1	0	3
25456	PLEKHA3	1.22731e-09	0.0129236	0.0253475	0.466986	0.0443099	0.782767	0.835265	8.10826e-09	0.907765	1.77018e-08	0.0110691	0	0	0	0	0	0	1	0	1	0	2
16290	EW266148	1.24053e-09	0.109082	0.0947076	0.519681	0.000384083	4.00229e-06	0.0464275	1.9414e-10	0.965789	0.103316	0.418237	0	0	0	1	1	0	1	0	0	0	3
25930	RPL35	1.29563e-09	2.29928e-05	0.881572	0.979471	0.346769	3.07576e-06	0.00755924	1.75529e-10	0.936736	0.113368	0.725867	1	0	0	0	1	0	1	0	0	0	3
14765	CN156560	1.34951e-09	0.691148	0.929768	0.668	1.26079e-05	0.380494	0.941692	7.85869e-09	0.737244	8.04932e-07	0.00016472	0	0	0	1	0	0	1	0	1	1	4
38659	MINPP1	1.41849e-09	0.0741963	0.00715696	0.0343339	3.22881e-10	0.625447	0.676537	6.46666e-06	0.849583	6.20672e-05	0.217013	0	0	0	1	0	0	1	0	1	0	3
29269	HMHA1	1.41849e-09	0.0137794	2.98244e-06	0.0968333	1.66562e-09	0.0661133	0.974365	0.000342826	0.753865	0.144857	0.112398	0	1	0	1	0	0	1	0	0	0	3
38055	PIK3C3	1.42958e-09	0.860919	0.845121	0.519295	0.000127664	0.395952	0.421089	2.10928e-05	0.775006	5.50745e-08	8.51504e-05	0	0	0	1	0	0	1	0	1	1	4
22376	ELTD1	1.42958e-09	0.0230814	5.42962e-08	0.24757	0.152988	0.00036367	0.964702	0.221622	0.240629	8.72004e-07	0.799554	0	1	0	0	1	0	0	0	1	0	3
31285	AK240110	1.58964e-09	0.271076	0.110917	0.780739	0.00240572	3.39996e-05	0.928084	0.124694	0.307559	7.39107e-10	0.282069	0	0	0	0	1	0	0	0	1	0	2
998	TC301850	1.76139e-09	0.504143	0.221829	0.638813	5.57483e-08	0.708533	0.979865	5.05189e-07	0.975305	3.11152e-06	0.00949501	0	0	0	1	0	0	1	0	1	0	3
831	RNLS	1.85973e-09	1.70258e-09	8.90553e-05	0.00196833	0.000423144	0.00684531	0.717666	0.00113421	0.840026	0.716467	0.555294	1	1	0	1	0	0	0	0	0	0	3
24196	ARHGAP18	1.91205e-09	0.758016	0.663882	0.411648	2.41721e-05	0.149451	0.738939	3.72872e-05	0.37782	1.58166e-09	0.258922	0	0	0	1	0	0	1	0	1	0	3
24985	TC296400	2.07505e-09	1.99438e-05	0.0679147	0.106247	4.82317e-08	0.00770828	0.709295	0.407896	0.840201	4.94227e-05	0.21393	1	0	0	1	0	0	0	0	1	0	3
19412	STRN	2.35646e-09	1.01144e-07	3.04784e-07	5.45141e-05	5.42541e-09	0.787157	0.861952	0.881626	0.788736	0.561342	0.828503	1	1	1	1	0	0	0	0	0	0	4
11586	NT5E	2.41051e-09	0.135074	0.362114	0.625451	9.06542e-09	0.586732	0.946877	2.70153e-05	0.982956	1.38251e-07	0.00753811	0	0	0	1	0	0	1	0	1	0	3
18374	CYP4F55	2.45287e-09	3.28392e-05	0.0595517	0.269346	2.47756e-08	0.00479721	0.429396	0.159223	0.978294	4.63629e-06	0.0321272	1	0	0	1	0	0	0	0	1	0	3
22494	PIK3C3	2.48855e-09	0.871614	0.753772	0.784389	0.000288386	0.250111	0.700622	1.47055e-05	0.947319	1.14642e-08	0.000956861	0	0	0	1	0	0	1	0	1	1	4
27559	C19orf42	2.48855e-09	1.15657e-05	0.497266	0.420197	4.18467e-07	7.16097e-05	0.292348	0.83208	0.849583	2.18528e-06	0.0905105	1	0	0	1	1	0	0	0	1	0	4
34049	PRPS2	2.49597e-09	0.109331	0.117714	0.422351	0.0178282	2.5568e-07	0.0175655	8.6496e-09	0.998218	0.550268	0.850369	0	0	0	0	1	0	1	0	0	0	2
13235	AJ657721	2.73896e-09	0.00308116	0.00740047	0.0330187	1.34541e-09	0.681994	0.964337	0.000934106	0.858199	4.1567e-05	0.184519	0	0	0	1	0	0	1	0	1	0	3
14540	PIK3C3	2.77316e-09	0.865577	0.409119	0.341199	0.00175048	0.0507516	0.239607	0.000495718	0.82834	1.12409e-08	0.000125222	0	0	0	0	0	0	1	0	1	1	3
37206	POP4	3.03421e-09	0.0146731	0.841537	0.21326	4.38564e-06	0.000332842	0.987212	0.0983131	0.291568	3.34587e-09	0.395239	0	0	0	1	1	0	0	0	1	0	3
7089	CADM1	3.32685e-09	0.151815	5.90451e-07	0.000226709	4.18467e-07	0.000948886	0.0315741	0.000608071	0.846447	0.985678	0.715624	0	1	1	1	1	0	1	0	0	0	5
26905	BX668691	3.41217e-09	0.695859	1.36513e-06	0.0547999	0.06624	3.95977e-07	0.221373	0.186503	0.771046	0.000462909	0.500796	0	1	0	0	1	0	0	0	1	0	3
1515	IVD	3.49634e-09	0.253144	0.555917	0.833826	4.89402e-08	0.573287	0.884363	2.01659e-05	0.983912	8.96289e-08	0.00341332	0	0	0	1	0	0	1	0	1	0	3
12310	QKI	3.51805e-09	0.942086	0.741859	0.466986	3.31498e-05	0.495916	0.474505	9.60202e-06	0.79309	1.65396e-08	6.91236e-05	0	0	0	1	0	0	1	0	1	1	4
27533	ST7L	3.51805e-09	2.22598e-08	0.502732	0.630607	0.0687809	1.05261e-07	0.016809	1.17097e-05	0.945215	0.360113	0.88897	1	0	0	0	1	0	1	0	0	0	3
39088	C19orf42	3.54862e-09	2.98562e-05	0.346819	0.765797	2.21926e-07	0.000737915	0.103899	0.603476	0.965396	4.9146e-06	0.0103821	1	0	0	1	1	0	0	0	1	0	4
7148	BX675981	3.54862e-09	0.235262	0.951343	0.928166	5.95327e-07	0.126957	0.771102	0.000230184	0.966869	8.02109e-09	0.00384655	0	0	0	1	0	0	1	0	1	0	3
8138	TSPAN9	3.54862e-09	0.21911	0.511473	0.919577	0.000728999	0.000972292	0.742502	4.06033e-10	0.733753	0.00320231	0.0107708	0	0	0	1	1	0	1	0	0	0	3
27414	C1H9orf156	3.66202e-09	0.460482	3.35971e-06	0.0903711	2.39452e-05	6.08543e-06	0.477998	6.50469e-05	0.722262	0.819767	0.610453	0	1	0	1	1	0	1	0	0	0	4
3820	DMXL1	3.66202e-09	0.0515354	1.2129e-07	0.000990001	0.238841	0.00226167	0.181434	0.297838	0.983114	1.70672e-06	0.00899275	0	1	1	0	0	0	0	0	1	0	3
17469	CALM1	3.66202e-09	0.34424	0.00644579	0.880434	0.975663	3.98895e-10	0.42319	0.0654305	0.476906	0.000146575	0.865325	0	0	0	0	1	0	0	0	1	0	2
40882	HSD11B1	3.71265e-09	0.474593	0.00047485	0.214939	0.597176	6.45729e-08	0.0450307	0.705749	0.850473	1.77676e-07	0.0460465	0	1	0	0	1	0	0	0	1	0	3
23411	TIMP2	3.71265e-09	5.5456e-05	0.00482803	0.11087	0.972406	0.126485	0.719128	2.72716e-08	0.996487	7.71826e-05	0.0563732	1	0	0	0	0	0	1	0	1	0	3
41590	QKI	3.74759e-09	0.483024	0.189263	0.122712	0.00795031	0.679038	0.558863	3.34971e-06	0.775609	4.8994e-08	7.71293e-05	0	0	0	0	0	0	1	0	1	1	3
38496	fliI	3.86944e-09	0.0956724	0.31793	0.769518	1.35492e-08	0.523525	0.811417	9.341e-05	0.953008	3.7062e-07	0.00356335	0	0	0	1	0	0	1	0	1	0	3
22078	Cenpb	4.0581e-09	8.22679e-06	0.105798	0.106576	1.87406e-06	0.000645231	0.607798	0.97059	0.806567	0.000325124	0.391018	1	0	0	1	1	0	0	0	1	0	4
19234	PSEN1	4.0581e-09	0.00107284	0.93622	0.665609	0.000158095	5.25496e-05	0.00303052	0.949257	0.735169	9.40886e-06	0.000564832	0	0	0	1	1	0	0	0	1	1	4
19059	nupl1	4.0581e-09	0.0654245	4.47793e-08	0.00167378	0.000345797	3.56363e-05	0.249149	0.113831	0.91964	0.0352156	0.614281	0	1	0	1	1	0	0	0	0	0	3
35839	PRPS2	4.13367e-09	0.111807	0.00466275	0.849068	0.39672	1.92692e-10	0.199237	0.000148266	0.51722	0.0173891	0.926932	0	0	0	0	1	0	1	0	0	0	2
9424	DN113616	4.18434e-09	0.0495512	1.08208e-05	0.001431	0.973251	0.0461511	0.242984	0.00818765	0.868611	1.25884e-07	0.000564832	0	1	0	0	0	0	0	0	1	1	3
18875	TWISTNB	4.79876e-09	2.80919e-08	1.80722e-06	0.24841	2.87231e-08	0.400936	0.141914	0.85453	0.558627	0.51471	0.100847	1	1	0	1	0	0	0	0	0	0	3
16234	PPP6R3	4.91107e-09	0.452837	3.13916e-06	0.693384	0.872139	0.000170658	0.996636	0.131721	0.221029	2.93051e-09	0.509366	0	1	0	0	1	0	0	0	1	0	3
3418	ZNF275	4.98366e-09	3.44221e-09	7.92596e-06	0.00266799	2.05189e-05	0.0919415	0.788082	0.0352264	0.936736	0.822685	0.8122	1	1	0	1	0	0	0	0	0	0	3
27306	PLEKHA8	5.08593e-09	0.00125074	5.88251e-10	0.00322802	0.000100148	0.00556077	0.757659	0.886882	0.790856	0.00492169	0.678657	0	1	0	1	0	0	0	0	0	0	2
13510	FCGR2B	5.26591e-09	0.61668	0.333201	0.792321	1.66039e-06	0.721929	0.998962	1.07934e-06	0.936736	7.67602e-06	0.00882182	0	0	0	1	0	0	1	0	1	0	3
23314	RPL38	5.34408e-09	0.284618	4.11529e-08	0.0352968	0.116533	1.23785e-05	0.412472	0.929387	0.714136	4.42485e-06	0.279371	0	1	0	0	1	0	0	0	1	0	3
10134	CD163	5.43105e-09	0.40376	0.862029	0.560338	0.000780009	0.367846	0.979829	3.57109e-08	0.796086	4.41225e-06	0.000818384	0	0	0	1	0	0	1	0	1	1	4
24034	CCDC109B	5.43105e-09	0.446054	0.762441	0.96871	0.000417938	0.0293118	0.813598	1.03298e-09	0.866356	8.7197e-05	0.0104854	0	0	0	1	0	0	1	0	1	0	3
30593	EW330916	5.43105e-09	0.86291	0.675319	0.961476	1.57157e-05	0.27729	0.911795	1.46798e-05	0.938011	2.06771e-09	0.00384655	0	0	0	1	0	0	1	0	1	0	3
29021	GPRC5B	5.43105e-09	0.062596	0.576016	0.79893	0.00255786	0.160272	0.123153	1.03298e-09	0.655312	2.06293e-06	0.298581	0	0	0	0	0	0	1	0	1	0	2
11948	LETM1	5.77217e-09	3.28392e-05	0.910441	0.289835	2.07358e-05	3.31105e-06	0.521762	0.873898	0.569531	2.1582e-06	0.424896	1	0	0	1	1	0	0	0	1	0	4
12368	Ndrg2	5.77217e-09	0.648312	0.00292203	0.172752	0.0926989	0.015345	0.526547	0.00235088	0.955051	1.50472e-09	0.00241024	0	0	0	0	0	0	0	0	1	0	1
36011	DGKE	5.81476e-09	0.000707665	0.000764591	0.0852653	2.39188e-10	0.884337	0.964702	0.00484776	0.982956	0.000954762	0.0958007	1	1	0	1	0	0	0	0	1	0	4
10732	BAG2	6.00872e-09	0.558948	0.00017246	0.368438	5.28964e-07	0.0012435	0.811417	2.33761e-06	0.674878	0.213726	0.0935792	0	1	0	1	0	0	1	0	0	0	3
30619	ELF2	6.13572e-09	0.000643527	0.250558	0.978531	0.416539	0.00470358	0.0382173	1.09388e-09	0.745585	0.00109211	0.620036	1	0	0	0	0	0	1	0	0	0	2
22219	TRPM7	6.4836e-09	0.0409125	0.369658	0.13427	7.7629e-08	0.211226	0.961158	0.00116903	0.692785	5.72634e-07	0.198683	0	0	0	1	0	0	0	0	1	0	2
39796	TC273842	6.50096e-09	0.905123	0.471265	0.734389	0.000131518	0.527333	0.89116	2.84742e-06	0.992247	4.69022e-09	0.00131231	0	0	0	1	0	0	1	0	1	0	3
26602	PIR	6.92599e-09	0.476256	0.933006	0.807782	6.01388e-07	0.374784	0.978174	2.32489e-05	0.894793	1.40806e-08	0.0119086	0	0	0	1	0	0	1	0	1	0	3
40588	FN1	7.37854e-09	0.592382	0.863894	0.545441	0.00128328	0.595195	0.919742	3.08935e-07	0.782818	5.31655e-06	0.000810708	0	0	0	0	0	0	1	0	1	1	3
19953	METTL8	7.6846e-09	0.757207	0.292276	0.63234	1.30444e-06	0.475235	0.901117	3.88911e-07	0.994695	1.73108e-05	0.0298081	0	0	0	1	0	0	1	0	1	0	3
43969	GALNT1	8.11633e-09	0.0492526	0.0944305	0.518885	4.35893e-09	0.752119	0.913428	0.00016042	0.966869	5.04097e-06	0.010722	0	0	0	1	0	0	1	0	1	0	3
36928	TTN	8.20708e-09	0.929773	0.896171	0.758932	1.37132e-05	0.684068	0.755704	4.21579e-06	0.883512	4.1713e-08	0.000398866	0	0	0	1	0	0	1	0	1	1	4
41068	WDR91	8.74759e-09	0.0020785	0.75241	0.48145	2.47698e-06	0.000512148	0.609254	0.193634	0.796086	1.92859e-07	0.0792264	0	0	0	1	1	0	0	0	1	0	3
24301	CDC14A	9.43954e-09	6.22553e-08	5.60816e-07	0.00729675	0.0121318	0.656691	0.838481	0.000607385	0.939379	0.0038455	0.323506	1	1	0	0	0	0	1	0	0	0	3
26799	PLEKHA9	9.64733e-09	4.26949e-05	3.35971e-06	0.000250961	1.90256e-09	0.842251	0.683903	0.108413	0.796571	0.170198	0.995852	1	1	1	1	0	0	0	0	0	0	4
20561	SGMS1	1.02134e-08	1.13387e-09	1.2129e-07	0.000107538	1.0041e-06	0.124386	0.936958	0.146401	0.888015	0.988457	0.816399	1	1	1	1	0	0	0	0	0	0	4
14408	LPIN1	1.1317e-08	0.341422	0.111442	0.0329228	1.70872e-07	0.679894	0.37115	3.43443e-06	0.648812	3.04621e-05	0.495426	0	0	0	1	0	0	1	0	1	0	3
33574	TTN	1.14502e-08	5.75779e-09	1.80722e-06	0.000996913	0.000404887	0.249232	0.938751	0.00524824	0.904661	0.166233	0.344147	1	1	1	1	0	0	0	0	0	0	4
36353	TC256648	1.20824e-08	0.0035471	0.110513	0.842664	3.93571e-07	0.151445	0.276119	0.0546499	0.796571	0.000113157	0.00424138	0	0	0	1	0	0	0	0	1	0	2
4671	PEX11A	1.26299e-08	0.0261688	0.898476	0.873585	0.000834091	0.000110332	0.0759163	0.487131	0.950993	1.44927e-06	0.00578826	0	0	0	1	1	0	0	0	1	0	3
19796	FNTB	1.26299e-08	0.239124	0.0148685	0.382916	0.366853	2.61426e-09	0.0315741	0.000305455	0.897253	0.0614401	0.735673	0	0	0	0	1	0	1	0	0	0	2
5202	NOP56	1.32172e-08	0.00245432	0.779297	0.976089	0.000836955	4.00229e-06	0.11631	0.956456	0.893139	1.98798e-06	0.0586384	0	0	0	1	1	0	0	0	1	0	3
33932	ZNF622	1.38563e-08	0.0010195	0.449526	0.770879	0.0262385	7.21424e-08	0.00715695	0.184484	0.988574	2.87801e-05	0.0474723	0	0	0	0	1	0	0	0	1	0	2
17962	EHHADH	1.45694e-08	0.00113329	0.593609	0.00196833	1.35444e-06	0.00351375	0.702782	0.294338	0.0857001	3.12064e-06	0.919293	0	0	0	1	0	0	0	0	1	0	2
7971	ECH1	1.45694e-08	0.359578	0.313774	0.649455	0.00221119	0.000235179	0.185538	3.7215e-09	0.991221	0.0253162	0.332505	0	0	0	0	1	0	1	0	0	0	2
8718	TC263891	1.46915e-08	0.102887	0.241681	0.693384	3.65963e-07	0.619476	0.859902	0.000402961	0.9546	8.80066e-06	0.0114054	0	0	0	1	0	0	1	0	1	0	3
35365	UTP18	1.55714e-08	0.227402	5.29032e-07	5.8438e-05	0.00162495	0.000284238	0.00715695	0.150369	0.776031	0.0299687	0.0551531	0	1	1	0	1	0	0	0	0	0	3
18475	EW528311	1.60863e-08	0.000108756	0.43456	0.816171	0.296656	1.63981e-09	0.125986	0.000951522	0.605536	0.00513961	0.925311	1	0	0	0	1	0	1	0	0	0	3
35667	PIK3C3	1.60969e-08	0.716961	0.920767	0.725624	0.00010238	0.296244	0.505402	4.83131e-05	0.84222	6.7065e-08	0.000336429	0	0	0	1	0	0	1	0	1	1	4
8047	NEK6	1.64516e-08	0.945496	0.66859	0.765711	1.24885e-05	0.406734	0.879661	2.47295e-07	0.66746	1.5463e-05	0.000352717	0	0	0	1	0	0	1	0	1	1	4
28884	CN163924	1.76186e-08	0.105097	8.63915e-07	0.000990001	2.96792e-05	0.000311666	0.120921	0.00642263	0.952661	0.586973	0.751848	0	1	1	1	1	0	0	0	0	0	4
31578	GLE1	1.76186e-08	0.000686677	0.537441	0.933597	0.848133	3.25079e-09	0.0156011	2.34819e-05	0.910469	0.152122	0.823113	1	0	0	0	1	0	1	0	0	0	3
31573	EV861801	1.76186e-08	0.964379	0.0652076	0.413732	1.0508e-06	0.0165496	0.457126	2.24341e-08	0.983348	0.00207734	0.124619	0	0	0	1	0	0	1	0	0	0	2
16487	PROCR	1.84364e-08	0.00685209	0.0138323	0.313047	0.398828	0.747778	0.887763	9.06772e-07	0.945728	3.75373e-06	0.0407174	0	0	0	0	0	0	1	0	1	0	2
43934	DT322069	1.8558e-08	0.992772	0.16592	0.341327	0.00126938	0.0833261	0.409086	0.000252071	0.0934497	2.06771e-09	0.7457	0	0	0	0	0	0	1	0	1	0	2
9713	IDE	1.87403e-08	0.829076	0.0102326	0.0426903	1.05314e-05	0.0039161	0.121994	2.75126e-07	0.865521	0.0313196	0.710982	0	0	0	1	0	0	1	0	0	0	2
26381	TC253390	1.8857e-08	0.955307	0.41871	0.4558	0.000426292	0.350015	0.610845	3.28129e-05	0.893457	1.70669e-08	0.000331881	0	0	0	1	0	0	1	0	1	1	4
26874	BRK1	1.8857e-08	0.237487	0.408696	0.0380392	9.66566e-08	0.733559	0.467669	4.71595e-05	0.48416	1.13262e-06	0.542188	0	0	0	1	0	0	1	0	1	0	3
35392	TC246254	1.9633e-08	5.27853e-06	0.0110798	0.0699095	0.626719	0.0227901	0.700999	5.41178e-07	0.908534	0.0106966	0.111499	1	0	0	0	0	0	1	0	0	0	2
8215	RAPGEF2	2.15571e-08	0.0580599	0.560586	0.398982	0.0113129	0.150962	0.973136	9.5843e-09	0.812191	1.70755e-05	0.00241024	0	0	0	0	0	0	1	0	1	0	2
41343	RASSF2	2.19104e-08	0.0474697	0.00549916	0.153816	6.11495e-08	0.681569	0.973136	0.000149858	0.980253	0.00118657	0.104865	0	0	0	1	0	0	1	0	0	0	2
12276	GPRC5B	2.21988e-08	0.0869476	0.571405	0.777303	0.00375637	0.224212	0.133782	5.56735e-09	0.64029	3.53047e-06	0.365708	0	0	0	0	0	0	1	0	1	0	2
12422	QKI	2.26277e-08	0.834611	0.926782	0.754298	1.75538e-05	0.562605	0.674762	2.2739e-05	0.86386	9.33523e-08	0.000427726	0	0	0	1	0	0	1	0	1	1	4
20608	TC265825	2.26277e-08	0.201945	0.591656	0.23549	0.000490113	0.00482916	0.015219	2.95757e-09	0.699793	0.00249775	0.777132	0	0	0	1	0	0	1	0	0	0	2
21653	TYROBP	2.31337e-08	0.957095	0.0265958	0.977549	1.597e-06	0.0131961	0.998962	1.99692e-07	0.533828	0.0111065	0.00363311	0	0	0	1	0	0	1	0	0	0	2
18624	TC252949	2.41827e-08	0.0890983	0.452209	0.658483	0.00557466	0.336719	0.888851	1.13396e-08	0.971998	1.97241e-06	0.00792859	0	0	0	0	0	0	1	0	1	0	2
35168	THBS4	2.87766e-08	0.0869013	0.111133	0.12059	0.120125	0.852023	0.889305	2.40564e-06	0.819013	4.38101e-06	0.00137197	0	0	0	0	0	0	1	0	1	0	2
24943	EW607561	2.95252e-08	0.823552	0.65913	0.317229	9.44825e-07	0.880681	0.58751	1.00268e-06	0.729391	9.89205e-07	0.19172	0	0	0	1	0	0	1	0	1	0	3
12980	CXCL14	2.98124e-08	0.000630178	9.46763e-09	0.001431	1.66891e-06	0.0456567	0.700622	0.412342	0.936736	0.275218	0.86292	1	1	0	1	0	0	0	0	0	0	3
14268	AW657518	3.17389e-08	9.328e-07	0.142198	0.0956222	1.35044e-06	0.000335644	0.573864	0.77836	0.75925	0.000539518	0.539494	1	0	0	1	1	0	0	0	1	0	4
25280	MAT2B	3.61737e-08	0.556451	0.000823571	0.856017	0.500206	3.95977e-07	0.614516	0.907715	0.407448	1.47173e-07	0.493482	0	1	0	0	1	0	0	0	1	0	3
111	SGMS1	3.77249e-08	1.20248e-08	1.11593e-05	0.0171899	9.34297e-06	0.134548	0.610611	0.108527	0.968933	0.976411	0.956249	1	1	0	1	0	0	0	0	0	0	3
19402	COL8A1	3.86434e-08	0.312246	0.387295	0.658752	0.00232662	0.867745	0.992143	1.98335e-07	0.987715	1.94294e-07	0.00464942	0	0	0	0	0	0	1	0	1	0	2
17490	BAIAP2	3.95315e-08	1.85508e-06	0.000457005	0.00395807	0.168095	0.0798761	0.946877	8.78821e-06	0.825585	0.0125936	0.0667062	1	1	0	0	0	0	1	0	0	0	3
18103	DICER1	3.95315e-08	0.0574276	0.00554245	0.231792	0.174709	0.655419	0.987596	6.96542e-06	0.950127	5.62096e-08	0.00890688	0	0	0	0	0	0	1	0	1	0	2
7687	PIK3C3	4.01673e-08	0.698977	0.993954	0.816323	6.53709e-05	0.432546	0.628265	5.38341e-05	0.86386	2.21573e-07	0.000724697	0	0	0	1	0	0	1	0	1	1	4
715	CB097303	4.34671e-08	0.531125	6.96174e-07	0.193716	0.0971901	6.86036e-06	0.649557	0.529299	0.55149	0.000122184	0.751789	0	1	0	0	1	0	0	0	1	0	3
7755	TC292806	4.40338e-08	0.887971	0.716059	0.438602	0.000155234	0.349469	0.393188	0.000151901	0.790856	1.20852e-07	0.000135644	0	0	0	1	0	0	1	0	1	1	4
31864	E2F3	4.60726e-08	0.0613587	0.240475	0.0254383	7.93833e-08	0.49914	0.659471	0.000982396	0.516185	5.90414e-06	0.605073	0	0	0	1	0	0	1	0	1	0	3
35565	AK238885	4.93591e-08	0.0229705	0.588885	0.708943	0.12806	0.0230269	0.630213	1.23433e-08	0.959776	0.000835948	0.0758498	0	0	0	0	0	0	1	0	1	0	2
33694	TC260738	4.95218e-08	0.802659	7.3371e-06	0.511194	0.218693	1.01232e-06	0.795703	0.409196	0.322513	0.000120371	0.939923	0	1	0	0	1	0	0	0	1	0	3
23566	AK231538	5.01365e-08	0.15533	5.65639e-05	0.00843146	9.62045e-07	0.0103308	0.325401	0.000149858	0.966917	0.315905	0.824254	0	1	0	1	0	0	1	0	0	0	3
33069	IFI30	5.11317e-08	0.484809	0.026276	0.925946	4.00706e-06	0.14192	0.89267	1.57923e-05	0.558627	0.00820789	0.00426817	0	0	0	1	0	0	1	0	0	0	2
2923	Dpysl3	5.11317e-08	0.38638	0.654117	0.964789	0.00295176	0.00608837	0.610611	6.64313e-09	0.920051	0.00242173	0.0775502	0	0	0	0	0	0	1	0	0	0	1
24045	AJ961184	5.47336e-08	0.350935	0.972028	0.840633	1.16288e-05	0.14006	0.443059	0.00129853	0.899939	1.20852e-07	0.000810708	0	0	0	1	0	0	0	0	1	1	3
20809	TC248471	5.47392e-08	0.0352059	5.29032e-07	0.00680299	3.39792e-06	0.00548584	0.547176	0.0208513	0.918104	0.733757	0.962014	0	1	0	1	0	0	0	0	0	0	2
15604	Dctn5	5.55402e-08	0.0163325	0.000105709	0.333145	6.61044e-09	0.316252	0.942523	0.00130919	0.712218	0.046479	0.0423435	0	1	0	1	0	0	0	0	0	0	2
39933	MMRN2	6.00771e-08	0.0600026	0.122326	0.368438	0.0267731	1.59813e-06	0.00962199	8.81222e-08	0.968904	0.740307	0.973599	0	0	0	0	1	0	1	0	0	0	2
39887	TMSB4X	6.07138e-08	0.762204	0.353151	0.878454	0.000100148	0.0276408	0.754729	4.67323e-08	0.889283	0.00167106	0.0440108	0	0	0	1	0	0	1	0	0	0	2
33996	TC256890	6.11227e-08	0.847275	0.645891	0.9261	0.000444438	0.824429	0.862	2.16481e-06	0.796571	1.12384e-07	0.0651186	0	0	0	1	0	0	1	0	1	0	3
25197	TEAD1	6.11227e-08	0.942443	0.131796	0.973068	5.46659e-06	0.0329996	0.962877	1.03977e-07	0.707662	0.00229619	0.0065532	0	0	0	1	0	0	1	0	0	0	2
35548	PCYOX1	6.32758e-08	0.00246606	0.693262	0.640671	0.415451	0.0004355	0.424838	1.26605e-08	0.893761	0.0340764	0.171694	0	0	0	0	1	0	1	0	0	0	2
24539	ST6GALNAC2	6.32758e-08	0.45516	0.111455	0.792995	0.00461107	2.60465e-05	0.397214	6.55217e-08	0.816376	0.237364	0.262372	0	0	0	0	1	0	1	0	0	0	2
8773	MYBPH	6.37103e-08	0.399891	6.96174e-07	0.106692	2.58889e-05	6.60277e-05	0.571233	0.00182978	0.686764	0.408482	0.74564	0	1	0	1	1	0	0	0	0	0	3
38208	N4BP2L1	6.59419e-08	0.841495	0.75759	0.971216	0.000462312	0.217171	0.973136	4.26171e-05	0.865521	3.02366e-08	0.0247152	0	0	0	1	0	0	1	0	1	0	3
16790	EIF2B3	6.7723e-08	0.0217356	0.184826	0.0203732	1.45011e-07	0.328673	0.749783	0.00624353	0.518816	1.94438e-05	0.662431	0	0	0	1	0	0	0	0	1	0	2
11327	ATIC	7.19935e-08	2.22537e-06	1.11593e-05	0.000107538	0.000444438	0.643937	0.80676	0.118934	0.688051	0.345601	0.141706	1	1	1	1	0	0	0	0	0	0	4
10516	TC294759	7.26843e-08	0.180791	0.599462	0.265	0.00652677	0.000867413	0.0106752	0.310766	0.708391	2.31018e-06	0.000220821	0	0	0	0	1	0	0	0	1	1	3
35027	AK239114	7.5309e-08	0.118868	5.08124e-05	0.0442395	9.40918e-07	0.0103308	0.676537	7.66301e-05	0.91964	0.220707	0.449848	0	1	0	1	0	0	1	0	0	0	3
20063	AQP11	7.54004e-08	0.133436	3.91056e-05	0.0802965	3.07432e-07	0.0204315	0.737263	0.000342826	0.871438	0.338508	0.41459	0	1	0	1	0	0	1	0	0	0	3
40301	ZNF655	7.5766e-08	0.393424	4.65756e-06	0.709394	0.8832	0.0004355	0.992872	0.285843	0.228777	1.31449e-07	0.719447	0	1	0	0	1	0	0	0	1	0	3
38421	RMND5B	7.89444e-08	0.955307	0.00508776	0.193796	0.301962	0.000257262	0.200934	0.293489	0.959206	1.63426e-07	0.0109411	0	0	0	0	1	0	0	0	1	0	2
25948	IL17RC	7.89444e-08	0.799616	0.13774	0.998665	0.00287885	0.235623	0.93767	4.38476e-05	0.655312	5.1514e-09	0.0858055	0	0	0	0	0	0	1	0	1	0	2
21245	SLC4A7	8.08389e-08	1.10033e-05	1.93361e-07	0.000592401	4.55818e-07	0.680524	0.8513	0.849767	0.94292	0.839518	0.831063	1	1	1	1	0	0	0	0	0	0	4
41530	INPP4A	8.08389e-08	0.920686	0.93274	0.781058	0.000347029	0.950311	0.912629	1.23233e-06	0.87136	1.13262e-06	0.00169432	0	0	0	1	0	0	1	0	1	0	3
13691	ZFYVE16	8.15156e-08	0.167548	0.000471146	0.00167378	0.998115	0.0467679	0.129901	0.0255787	0.758261	3.73179e-06	0.000564832	0	1	0	0	0	0	0	0	1	1	3
17604	TC269818	8.5624e-08	0.00489635	0.780122	0.818635	4.47409e-05	0.000164999	0.271649	0.276519	0.959206	6.70493e-07	0.0247152	0	0	0	1	1	0	0	0	1	0	3
21368	RAB32	8.5624e-08	0.00489635	0.264852	0.389333	0.67621	1.03902e-07	0.00150542	1.40937e-05	0.915169	0.336495	0.500796	0	0	0	0	1	0	1	0	0	0	2
9538	CAPN2	9.07432e-08	0.00489635	0.0311745	0.485795	0.233408	0.527626	0.73218	1.61894e-07	0.910587	3.70438e-06	0.0614325	0	0	0	0	0	0	1	0	1	0	2
11059	CJ027149	9.24556e-08	0.228344	0.241228	0.611858	1.10696e-07	0.933766	0.987212	6.14514e-05	0.990958	9.74875e-06	0.0228731	0	0	0	1	0	0	1	0	1	0	3
17473	TC286536	9.61257e-08	0.762207	0.556732	0.930504	0.000844637	0.0280507	0.796773	5.54019e-09	0.914902	0.000258478	0.0408603	0	0	0	1	0	0	1	0	1	0	3
41815	RPL15	1.01816e-07	0.000707665	0.695892	0.204929	0.000111649	0.000214822	0.792989	0.93873	0.605786	5.90766e-05	0.591521	1	0	0	1	1	0	0	0	1	0	4
5325	fn1	1.01991e-07	0.649043	0.786916	0.703315	0.00330078	0.78007	0.973136	1.29034e-06	0.894778	5.5529e-06	0.00438576	0	0	0	0	0	0	1	0	1	0	2
1906	POLR2G	1.03181e-07	1.04882e-07	2.26695e-06	0.00149608	2.71479e-06	0.526135	0.979865	0.408895	0.931204	0.915967	0.844798	1	1	0	1	0	0	0	0	0	0	3
18300	NME6	1.0365e-07	0.00112888	1.10068e-06	3.1032e-05	9.16838e-06	0.173404	0.224868	0.314429	0.715253	0.861726	0.40553	0	1	1	1	0	0	0	0	0	0	3
44140	AK237043	1.04075e-07	0.104796	3.91056e-05	0.0271341	1.24851e-06	0.0100729	0.610611	0.0001331	0.950993	0.273456	0.566228	0	1	0	1	0	0	1	0	0	0	3
20847	slc5a6	1.06813e-07	0.898419	0.961762	0.818635	4.35651e-05	0.883302	0.7888	6.04991e-07	0.843881	5.81677e-07	0.0665455	0	0	0	1	0	0	1	0	1	0	3
24059	AGBL3	1.06813e-07	0.100577	0.439583	0.754741	0.0345754	2.20215e-05	0.100375	2.269e-08	0.987715	0.191074	0.586825	0	0	0	0	1	0	1	0	0	0	2
25912	NDUFC1	1.07577e-07	0.0665045	0.963924	0.968485	1.05653e-05	0.0214522	0.317421	0.0334181	0.955542	3.47807e-07	0.00363311	0	0	0	1	0	0	0	0	1	0	2
8820	OAS1	1.08998e-07	0.469584	0.187106	0.839233	0.00733444	5.0487e-05	0.456955	4.88079e-08	0.82834	0.143414	0.231177	0	0	0	0	1	0	1	0	0	0	2
6075	FNTA	1.08998e-07	0.968049	0.179069	0.362037	5.12089e-05	0.0291291	0.383509	1.03453e-07	0.943086	0.0024887	0.281961	0	0	0	1	0	0	1	0	0	0	2
28045	BRE	1.11492e-07	0.681735	0.686693	0.87625	0.000516522	0.952957	0.707661	7.70305e-07	0.775609	3.7721e-07	0.109341	0	0	0	1	0	0	1	0	1	0	3
1640	HNRNPH3	1.11492e-07	0.0855801	0.568128	0.622622	0.000961314	0.000665698	0.0608328	0.325265	0.921364	3.7721e-07	0.00203539	0	0	0	1	1	0	0	0	1	0	3
16008	CIT	1.13707e-07	0.920272	0.000158621	0.0045261	0.796342	7.43631e-05	0.0118638	0.96012	0.86386	2.20333e-05	0.00489457	0	1	0	0	1	0	0	0	1	0	3
14200	TMEM201	1.16301e-07	0.808336	0.0821939	0.849068	0.0254579	0.00257065	0.749676	0.0487897	0.767736	4.12276e-08	0.0652276	0	0	0	0	0	0	0	0	1	0	1
30386	DB788523	1.17214e-07	0.00181672	0.000277436	0.083638	1.50463e-08	0.871169	0.991615	0.022106	0.943922	0.033473	0.239276	0	1	0	1	0	0	0	0	0	0	2
1958	WWP1	1.1915e-07	0.938147	0.00297322	0.204829	0.549474	6.88834e-05	0.308229	0.252612	0.913686	1.74554e-07	0.0283125	0	0	0	0	1	0	0	0	1	0	2
29974	LIMS1	1.19541e-07	0.566678	0.892892	0.994797	2.64531e-05	0.525979	0.838928	0.000210845	0.967686	1.66304e-06	0.00672633	0	0	0	1	0	0	1	0	1	0	3
5703	EBNA1BP2	1.21106e-07	0.958395	0.00146145	0.00442781	0.39592	7.69063e-06	0.00358638	0.191294	0.781971	0.00473442	0.0238367	0	0	0	0	1	0	0	0	0	0	1
40076	TC290342	1.27178e-07	0.852598	0.00624518	0.368438	1.85788e-05	0.00442112	0.628416	4.14387e-06	0.865521	0.13237	0.250419	0	0	0	1	0	0	1	0	0	0	2
8970	LAPTM5	1.29487e-07	0.549269	0.0119969	0.81702	3.93571e-07	0.0902015	0.99043	6.62011e-06	0.652573	0.00954447	0.00892332	0	0	0	1	0	0	1	0	0	0	2
8767	EIF4EBP3	1.30559e-07	0.0159942	0.338064	0.0440432	4.07603e-06	0.0745409	0.907293	0.0343551	0.518816	1.67776e-05	0.65004	0	0	0	1	0	0	0	0	1	0	2
17341	BF190721	1.3349e-07	0.00439543	3.73067e-05	0.00022881	1.15988e-06	0.400561	0.298289	0.0857547	0.699793	0.490412	0.728941	0	1	1	1	0	0	0	0	0	0	3
12340	TXNL4A	1.3349e-07	4.87198e-06	0.000188832	0.00336222	1.06623e-07	0.169032	0.974393	0.473334	0.852253	0.0196963	0.697913	1	1	0	1	0	0	0	0	0	0	3
20627	ETF1	1.38112e-07	0.40325	0.0492989	0.834893	0.0707006	0.358714	0.448997	7.09815e-05	0.264183	1.11466e-07	0.621176	0	0	0	0	0	0	1	0	1	0	2
22321	BI182796	1.38112e-07	0.7377	0.0460303	0.910126	0.0501027	0.0689857	0.984515	0.000416791	0.635971	1.39281e-08	0.119934	0	0	0	0	0	0	1	0	1	0	2
28661	BCAR1	1.39253e-07	0.0217356	0.184466	0.0975022	6.11495e-08	0.348617	0.950986	0.0044651	0.736362	1.18069e-05	0.305147	0	0	0	1	0	0	0	0	1	0	2
43315	CNN2	1.39406e-07	0.633072	0.00323547	0.110862	2.43329e-05	0.00363631	0.411124	4.21579e-06	0.987715	0.118668	0.522827	0	0	0	1	0	0	1	0	0	0	2
36581	TC286364	1.40817e-07	0.374143	0.188075	0.748468	0.00271155	0.000771085	0.978174	0.0941427	0.380524	1.26038e-08	0.360388	0	0	0	0	1	0	0	0	1	0	2
26356	CK454571	1.40817e-07	0.0239426	0.774028	0.929705	2.9487e-06	0.0248824	0.407722	0.0506091	0.986112	1.13262e-06	0.00808706	0	0	0	1	0	0	0	0	1	0	2
553	CH242-58J12.2	1.42399e-07	0.936845	0.628145	0.781058	0.00031643	0.652027	0.898562	1.52884e-05	0.978476	1.25884e-07	0.00356335	0	0	0	1	0	0	1	0	1	0	3
33033	C5orf5	1.42624e-07	0.0151414	0.00183979	0.000143724	4.53065e-07	0.758875	0.146666	0.0119537	0.404645	0.0354647	0.763105	0	0	1	1	0	0	0	0	0	0	2
17226	GNAQ	1.42624e-07	0.00147734	4.73317e-05	0.394219	1.84219e-08	0.666192	0.712745	0.0336829	0.612362	0.120046	0.0395497	0	1	0	1	0	0	0	0	0	0	2
43658	RNF170	1.43896e-07	2.21498e-05	0.000616471	0.193067	5.03827e-06	0.342513	0.554137	0.994369	0.861739	0.290392	0.360133	1	1	0	1	0	0	0	0	0	0	3
35170	CK458895	1.44601e-07	0.117038	0.582367	0.473848	0.0334436	0.217171	0.978174	1.08807e-07	0.84781	6.48404e-05	0.00653943	0	0	0	0	0	0	1	0	1	0	2
13856	H2AFY	1.4586e-07	0.0041898	2.81667e-05	0.0671223	0.592917	0.373512	0.992143	0.00267773	0.871004	1.19912e-05	0.116679	0	1	0	0	0	0	0	0	1	0	2
21387	TC249685	1.47985e-07	0.0593253	0.41497	0.485795	1.04464e-06	0.196937	0.921343	0.00227096	0.914512	2.15949e-06	0.0513842	0	0	0	1	0	0	0	0	1	0	2
3661	SUCLG1	1.55197e-07	0.00146324	0.910497	0.932511	0.000957811	2.4298e-05	0.0364373	0.852777	0.983114	1.87224e-05	0.0246817	0	0	0	1	1	0	0	0	1	0	3
37141	kctd12	1.57411e-07	0.339514	0.895298	0.888603	0.000848984	0.284393	0.879661	5.47367e-08	0.961519	1.30103e-05	0.0150108	0	0	0	1	0	0	1	0	1	0	3
27981	LAT2	1.57461e-07	0.863633	0.905857	0.195399	0.00274487	0.532845	0.405261	3.01931e-05	0.298042	0.000661845	7.71293e-05	0	0	0	0	0	0	1	0	1	1	3
12450	TC247998	1.60365e-07	4.26579e-07	0.00451855	0.00336222	3.19405e-05	0.00216665	0.898977	0.266474	0.673539	0.117671	0.931379	1	0	0	1	0	0	0	0	0	0	2
3518	MBNL1	1.64256e-07	0.542021	0.944713	0.785564	0.00436378	0.173223	0.992143	4.78681e-07	0.802484	0.000374306	0.00899275	0	0	0	0	0	0	1	0	1	0	2
26923	TJP2	1.65466e-07	0.840955	0.00790088	0.741484	2.93629e-05	0.00307624	0.930905	1.6154e-06	0.635971	0.0942285	0.0444272	0	0	0	1	0	0	1	0	0	0	2
16728	RPS29	1.66746e-07	0.975848	0.0141397	0.0949191	0.293543	0.00134031	0.127753	0.139431	0.932542	4.25731e-07	0.00282947	0	0	0	0	0	0	0	0	1	0	1
22375	GUSB	1.69637e-07	0.366701	0.219417	0.997852	0.000501791	0.00107005	0.729177	3.15554e-08	0.715253	0.0395285	0.0389933	0	0	0	1	0	0	1	0	0	0	2
13250	RGS5	1.69637e-07	0.738601	0.163998	0.00196833	0.00172693	0.00778185	0.000270861	8.80272e-06	0.237462	0.138582	0.343302	0	0	0	0	0	1	1	0	0	0	2
21949	PMM1	1.72348e-07	0.000286588	1.2129e-07	0.00424099	7.78831e-07	0.197143	0.887459	0.423389	0.927694	0.684117	0.987225	1	1	0	1	0	0	0	0	0	0	3
5738	BLMH	1.72945e-07	0.828135	0.00205892	0.11851	0.536639	2.80471e-05	0.0704505	0.862489	0.983348	9.72906e-07	0.0150108	0	0	0	0	1	0	0	0	1	0	2
23409	TC268188	1.7305e-07	0.77632	0.0609425	0.753276	0.0186288	0.11414	0.957772	0.000438257	0.812191	1.63233e-08	0.0315246	0	0	0	0	0	0	1	0	1	0	2
30255	GPX1	1.74998e-07	0.000197259	3.14576e-07	0.063329	0.00603605	0.306287	0.939471	0.210246	0.707662	0.00575173	0.825978	1	1	0	0	0	0	0	0	0	0	2
10207	CCDC125	1.801e-07	3.46501e-08	0.000884389	0.0606443	9.17149e-06	0.0202837	0.459822	0.177903	0.989435	0.376956	0.799161	1	1	0	1	0	0	0	0	0	0	3
33723	EV884576	1.81433e-07	0.884834	0.0116557	0.696281	3.51993e-05	0.00300532	0.875219	9.64079e-07	0.70521	0.0738824	0.059967	0	0	0	1	0	0	1	0	0	0	2
11239	CCDC175	1.85426e-07	0.721754	1.35537e-05	0.0335699	0.00559228	2.55754e-05	0.151425	0.0203741	0.91964	0.0792978	0.714111	0	1	0	0	1	0	0	0	0	0	2
31328	RPS25	1.92116e-07	0.800389	0.10643	0.51643	0.000669717	0.000935462	0.357754	1.23492e-07	0.959206	0.0572698	0.336394	0	0	0	1	1	0	1	0	0	0	3
603	AMOTL1	1.92301e-07	0.597118	0.913039	0.917185	1.16288e-05	0.563577	0.717373	0.000147763	0.893603	9.39939e-07	0.00191179	0	0	0	1	0	0	1	0	1	0	3
22151	CF362651	2.00643e-07	0.368448	0.911936	0.915268	0.000525224	0.104153	0.864368	3.57109e-08	0.89182	0.000131076	0.0148342	0	0	0	1	0	0	1	0	1	0	3
12878	ZNF577	2.01913e-07	3.96953e-05	0.00570523	0.00119986	1.04464e-06	0.137961	0.887763	0.719106	0.541002	0.0266707	0.922436	1	0	0	1	0	0	0	0	0	0	2
9349	DNAJC1	2.05792e-07	0.253937	0.826235	0.746833	0.0118704	0.0093928	0.925168	3.47675e-08	0.715253	0.00462287	0.0124694	0	0	0	0	0	0	1	0	0	0	1
8482	ZFX	2.08386e-07	0.911805	0.714301	0.739707	0.00031443	0.309979	0.700999	5.18745e-07	0.936886	0.000102151	0.124238	0	0	0	1	0	0	1	0	1	0	3
1230	XPNPEP3	2.09895e-07	5.22931e-05	0.590467	0.849914	0.243687	9.18876e-07	0.0315741	0.000103222	0.977958	0.571199	0.80243	1	0	0	0	1	0	1	0	0	0	3
31803	BOLA3	2.11829e-07	0.40729	0.306277	0.918512	5.29678e-06	0.954439	0.868119	0.00014001	0.840908	0.000113157	0.00752376	0	0	0	1	0	0	1	0	1	0	3
24319	MED13L	2.31041e-07	0.59828	0.871359	0.871539	9.43813e-05	0.57068	0.633237	0.000210393	0.82834	3.70438e-06	0.00167257	0	0	0	1	0	0	1	0	1	0	3
32357	TC287148	2.57325e-07	0.0406471	0.0767977	0.205255	0.126838	0.760422	0.991615	1.34007e-06	0.916422	4.11663e-06	0.00482766	0	0	0	0	0	0	1	0	1	0	2
11363	ANTXR2	2.57562e-07	0.549751	0.767465	0.968485	0.000622787	0.710355	0.767607	3.75704e-07	0.883512	1.80742e-06	0.0653025	0	0	0	1	0	0	1	0	1	0	3
1300	XPO7	2.58205e-07	9.08313e-07	3.38794e-06	0.000547601	0.00094404	0.590385	0.984737	0.0360862	0.865521	0.168776	0.29206	1	1	1	1	0	0	0	0	0	0	4
22384	CHURC1-FNTB	2.62036e-07	0.0645941	0.087652	0.76826	0.0620946	8.26397e-07	0.106607	6.97504e-07	0.838238	0.961198	0.736731	0	0	0	0	1	0	1	0	0	0	2
782	TC274986	2.62148e-07	0.929182	0.88474	0.862606	0.000633637	0.967622	0.95956	1.17526e-05	0.950124	3.53099e-06	0.0070709	0	0	0	1	0	0	1	0	1	0	3
39788	TULP4	2.62148e-07	0.406506	0.0464743	0.709271	0.112646	0.302772	0.990947	6.62879e-05	0.796571	1.09663e-07	0.066646	0	0	0	0	0	0	1	0	1	0	2
34435	C14orf45	2.62148e-07	0.836948	0.0107129	0.108559	4.7911e-05	0.00628971	0.2686	7.3585e-06	0.96425	0.127259	0.672222	0	0	0	1	0	0	1	0	0	0	2
34601	TMSB10	2.64157e-07	0.691148	0.0009418	0.670616	0.000227499	0.000318439	0.950567	4.3668e-05	0.518816	0.639744	0.117363	0	1	0	1	1	0	1	0	0	0	4
12947	PSAP	2.64157e-07	0.328988	0.143614	0.99789	0.0128163	0.80377	0.700686	3.96007e-06	0.655312	1.19934e-07	0.171731	0	0	0	0	0	0	1	0	1	0	2
34358	LGALS1	2.64281e-07	4.89213e-05	1.67393e-05	0.000122604	0.000100841	0.995637	0.62604	0.707627	0.686861	0.665319	0.254648	1	1	1	1	0	0	0	0	0	0	4
1790	C3orf10	2.64281e-07	0.159589	0.389682	0.11851	3.93858e-07	0.603078	0.791326	0.000516572	0.655312	5.89188e-06	0.374157	0	0	0	1	0	0	1	0	1	0	3
36247	TC263949	2.67244e-07	0.677346	0.87051	0.734682	0.000472513	0.727496	0.973136	1.04409e-06	0.882928	4.11663e-06	0.00314232	0	0	0	1	0	0	1	0	1	0	3
10769	AK238885	2.67244e-07	0.0531566	0.898476	0.81244	0.132853	0.000314953	0.613509	6.43668e-08	0.796571	0.0785865	0.124938	0	0	0	0	1	0	1	0	0	0	2
33751	AK237038	2.69204e-07	0.03858	0.0370661	0.150091	0.900738	0.867084	0.98387	0.00274546	0.932542	0.00586863	0.11916	0	0	0	0	0	0	0	0	0	0	0
17931	DY408263	2.71626e-07	0.0593253	0.0266957	0.699782	0.503804	3.51375e-08	0.0687825	0.000246843	0.796571	0.0597531	0.907942	0	0	0	0	1	0	1	0	0	0	2
30764	ARF3	2.72109e-07	0.574005	0.787258	0.974133	2.40455e-05	0.694189	0.782574	0.000137621	0.890827	4.18697e-06	0.00374781	0	0	0	1	0	0	1	0	1	0	3
9621	SORBS1	2.78011e-07	2.30076e-07	0.000969683	0.227919	4.66294e-05	0.0209111	0.172989	0.158428	0.844147	0.492536	0.453406	1	1	0	1	0	0	0	0	0	0	3
25918	TC247204	2.81584e-07	0.0508714	0.27202	0.69518	2.64102e-07	0.401223	0.796773	0.0036857	0.974835	1.42917e-05	0.0193823	0	0	0	1	0	0	0	0	1	0	2
30977	TC249120	2.88706e-07	0.551804	0.00670086	0.0280259	0.167405	1.65627e-06	0.00303052	0.00213758	0.84781	0.126005	0.215127	0	0	0	0	1	0	0	0	0	0	1
15689	TC276414	2.90219e-07	0.0479079	0.508725	0.898797	0.00113886	0.000114308	0.551895	0.527064	0.728247	2.40797e-07	0.140345	0	0	0	0	1	0	0	0	1	0	2
34025	BX920632	2.90219e-07	0.00927105	0.0904969	0.656002	1.00676e-07	0.38303	0.650077	0.0173284	0.903463	0.000124212	0.0168049	0	0	0	1	0	0	0	0	1	0	2
1648	LCLAT1	2.91713e-07	0.251196	0.926256	0.279377	0.000376697	0.00827292	0.912629	0.00467612	0.370023	4.36703e-08	0.487364	0	0	0	1	0	0	0	0	1	0	2
37255	PDIA3	2.91713e-07	0.00792409	3.48354e-06	0.0118194	5.61572e-07	0.102905	0.803179	0.0316325	0.942611	0.741179	0.790409	0	1	0	1	0	0	0	0	0	0	2
24030	SLA-DMA	2.91917e-07	0.256085	0.00597939	0.222281	1.24059e-06	0.146909	0.859902	4.3642e-05	0.93864	0.0155712	0.176869	0	0	0	1	0	0	1	0	0	0	2
14374	IL16	2.92507e-07	0.940175	0.0166642	0.679912	5.94268e-05	0.00505286	0.820367	4.62143e-06	0.75786	0.128915	0.111436	0	0	0	1	0	0	1	0	0	0	2
1707	COX6B	3.02419e-07	0.00406354	0.00510178	0.0629189	2.39201e-08	0.851154	0.982885	0.0147888	0.924577	0.00309809	0.331494	0	0	0	1	0	0	0	0	0	0	1
19458	TC291506	3.04782e-07	0.00113329	2.18047e-05	0.000996913	3.61684e-07	0.571964	0.647148	0.0910121	0.835182	0.340525	0.985404	0	1	1	1	0	0	0	0	0	0	3
35883	MARCKS	3.08401e-07	0.658089	0.297166	0.404481	3.43237e-05	0.599203	0.791326	2.10731e-05	0.915894	0.000331706	0.211827	0	0	0	1	0	0	1	0	1	0	3
27563	RFTN1	3.15404e-07	0.912744	0.00964779	0.198919	6.38556e-06	0.00723554	0.364113	1.99607e-06	0.989435	0.0724562	0.435849	0	0	0	1	0	0	1	0	0	0	2
18086	EW276263	3.15404e-07	0.983027	0.000457005	0.685265	0.0174757	2.07453e-06	0.771808	0.00157122	0.469755	0.240677	0.550811	0	1	0	0	1	0	0	0	0	0	2
26727	TC255861	3.23045e-07	1.604e-05	0.000235094	0.00149608	4.31749e-07	0.483771	0.938468	0.770178	0.770575	0.189861	0.964828	1	1	0	1	0	0	0	0	0	0	3
21600	RAB3IP	3.23045e-07	0.0764135	0.10147	0.368438	6.34303e-07	0.813689	0.986759	0.000669383	0.988024	9.34858e-05	0.0706888	0	0	0	1	0	0	1	0	1	0	3
22561	SAMD4A	3.23524e-07	0.0500767	0.616424	0.564934	5.30485e-06	0.0480228	0.842531	0.00821155	0.883512	7.50135e-07	0.0535099	0	0	0	1	0	0	0	0	1	0	2
13947	NT5DC3	3.24047e-07	0.000292416	2.47681e-05	0.00526057	4.40978e-05	0.831998	0.930161	0.941931	0.956381	0.898528	0.889023	1	1	0	1	0	0	0	0	0	0	3
36046	LOC780431	3.27184e-07	0.847718	0.0685955	0.640671	0.0434652	0.0727412	0.859476	0.00205676	0.882928	8.42184e-08	0.0252438	0	0	0	0	0	0	0	0	1	0	1
6892	MPZL1	3.35855e-07	0.0140906	0.812193	0.954117	0.151359	0.00381902	0.104449	2.64969e-08	0.870236	0.0105072	0.566264	0	0	0	0	0	0	1	0	0	0	1
36178	ZAK	3.45153e-07	0.000121311	0.494685	0.218101	0.615185	0.000106051	0.632351	1.57923e-05	0.720766	0.741266	0.340269	1	0	0	0	1	0	1	0	0	0	3
22643	ASXL2	3.47833e-07	7.71392e-07	6.44242e-06	0.00275669	1.83971e-06	0.438177	0.945072	0.808672	0.966914	0.677127	0.960135	1	1	0	1	0	0	0	0	0	0	3
9584	CMYA5	3.50827e-07	3.25014e-05	4.32985e-06	0.000806601	1.09882e-06	0.924218	0.845561	0.766814	0.865974	0.837585	0.863439	1	1	1	1	0	0	0	0	0	0	4
27550	C9orf64	3.53336e-07	0.817449	0.000186502	0.287869	0.0154704	9.52635e-07	0.186134	0.00060123	0.771046	0.142413	0.9894	0	1	0	0	1	0	1	0	0	0	3
31852	Dnajb14	3.53336e-07	0.00412881	2.31642e-05	0.000534359	6.01388e-07	0.350589	0.396709	0.0675185	0.782031	0.486934	0.856387	0	1	1	1	0	0	0	0	0	0	3
20450	RAB14	3.53336e-07	0.237832	0.88909	0.903191	1.3855e-05	0.188156	0.438776	0.00430327	0.868611	1.72075e-06	0.00184524	0	0	0	1	0	0	0	0	1	0	2
38161	SAP18	3.53336e-07	0.00954912	0.0190481	0.000990001	5.88919e-07	0.763614	0.377231	0.0399277	0.3789	0.00639898	0.891675	0	0	1	1	0	0	0	0	0	0	2
33867	RGMA	3.6275e-07	0.927964	0.929006	0.495018	0.000226842	0.971005	0.68064	4.02519e-05	0.716303	1.36323e-05	0.332313	0	0	0	1	0	0	1	0	1	0	3
11108	PRDX6	3.86852e-07	0.981386	0.788254	0.753276	1.67089e-05	0.739337	0.838481	1.94577e-06	0.91978	7.18736e-06	0.0687063	0	0	0	1	0	0	1	0	1	0	3
630	NLE1	4.0183e-07	0.732015	0.637992	0.733695	0.0016323	0.102438	0.550393	0.00373174	0.954611	5.77792e-07	0.00422294	0	0	0	0	0	0	0	0	1	0	1
26409	CXCL2	4.04654e-07	0.914307	0.743963	0.200313	0.000587676	0.330292	0.151425	7.65098e-07	0.562751	0.000122064	0.712419	0	0	0	1	0	0	1	0	1	0	3
2063	CREB3	4.04654e-07	0.684946	0.604324	0.199695	2.35264e-05	0.977679	0.542172	4.83606e-06	0.641315	4.25841e-06	0.378951	0	0	0	1	0	0	1	0	1	0	3
29413	LAT2	4.05104e-07	0.789882	0.947603	0.328269	0.000966185	0.742771	0.630869	8.52498e-06	0.572306	3.26622e-05	0.00016472	0	0	0	1	0	0	1	0	1	1	4
32840	CCDC141	4.09703e-07	0.563354	0.957621	0.333145	0.000281426	0.289051	0.11631	0.00465327	0.570941	6.59401e-06	7.71293e-05	0	0	0	1	0	0	0	0	1	1	3
36568	MAP1A	4.09703e-07	0.584673	0.829978	0.460547	0.000827358	0.59913	0.179751	0.00234408	0.513388	9.55398e-05	0.000170559	0	0	0	1	0	0	0	0	1	1	3
23509	FN1	4.09703e-07	0.676143	0.854231	0.510036	0.00374571	0.723844	0.860862	5.95957e-06	0.768602	3.36079e-05	0.00167257	0	0	0	0	0	0	1	0	1	0	2
24790	UBE2T	4.09703e-07	0.153278	0.958421	0.799474	1.75538e-05	0.0635319	0.838928	0.0108507	0.880453	5.72634e-07	0.0486212	0	0	0	1	0	0	0	0	1	0	2
29001	ECI2	4.10009e-07	0.25683	0.00104606	0.0502206	0.573841	0.0717596	0.494336	0.009693	0.969804	4.92576e-07	0.00466848	0	0	0	0	0	0	0	0	1	0	1
43717	SYNJ2BP	4.13139e-07	3.30915e-06	0.00897486	0.00735274	0.119141	0.0298303	0.96318	0.000230184	0.70495	0.227249	0.112254	1	0	0	0	0	0	1	0	0	0	2
22040	TUBA8	4.13771e-07	0.551381	0.0391926	0.974722	0.260687	4.76874e-06	0.852723	0.819802	0.404645	1.20334e-06	0.6126	0	0	0	0	1	0	0	0	1	0	2
7836	IL18	4.23374e-07	0.668889	0.40806	0.51643	0.000493504	0.0357509	0.861944	1.03649e-06	0.317683	0.009558	0.00056803	0	0	0	1	0	0	1	0	0	1	3
11795	ssc-mir-30c-2	4.2563e-07	0.017705	7.23656e-07	0.000318445	7.18419e-05	0.0296988	0.179751	0.318361	0.859256	0.273392	0.340631	0	1	1	1	0	0	0	0	0	0	3
23875	CPEB4	4.39151e-07	0.0005481	0.000339233	0.00325862	0.424613	0.905915	0.865012	0.000445957	0.82082	0.000731052	0.0157066	1	1	0	0	0	0	1	0	1	0	4
39325	LCP1	4.39742e-07	0.458626	0.00143225	0.499352	1.0768e-05	0.0144879	0.945072	0.000104159	0.701316	0.240655	0.118155	0	0	0	1	0	0	1	0	0	0	2
36349	NCF4	4.41121e-07	0.910796	0.109333	0.986371	0.000456029	0.0071627	0.98387	1.88854e-06	0.567163	0.0615457	0.0191589	0	0	0	1	0	0	1	0	0	0	2
31496	CYTH1	4.5457e-07	0.191805	0.209164	0.802395	2.67134e-06	0.895381	0.845483	0.000282446	0.878919	6.94178e-05	0.00997476	0	0	0	1	0	0	1	0	1	0	3
24605	GRLF1	4.6555e-07	0.358313	0.284696	0.967472	0.0275093	4.01572e-05	0.577757	0.243389	0.776735	1.36262e-07	0.103715	0	0	0	0	1	0	0	0	1	0	2
31715	HSF1	4.68367e-07	0.0557463	0.898476	0.38367	5.58453e-05	0.0175413	0.97114	0.0876469	0.655312	3.66595e-06	0.331494	0	0	0	1	0	0	0	0	1	0	2
29591	IL10RA	4.69054e-07	0.780862	0.146305	0.797659	2.03753e-06	0.26688	0.974393	3.98408e-06	0.863452	0.000757774	0.0230952	0	0	0	1	0	0	1	0	1	0	3
40547	C5AR1	4.81145e-07	0.964448	0.0504456	0.971383	0.000203292	0.0112303	0.994336	6.735e-06	0.558627	0.0818513	0.0219503	0	0	0	1	0	0	1	0	0	0	2
18157	M29512	4.93891e-07	0.0127577	0.00151059	0.69114	0.624832	0.775261	0.656755	4.17123e-05	0.600826	1.41549e-06	0.35005	0	0	0	0	0	0	1	0	1	0	2
34505	AJ958137	5.08418e-07	0.709337	0.996981	0.87785	0.000310837	0.540516	0.993502	7.84931e-07	0.91031	1.50106e-05	0.00758154	0	0	0	1	0	0	1	0	1	0	3
15329	BX922598	5.18804e-07	0.000635865	0.0245222	0.0123978	0.928713	0.255184	0.939639	6.99424e-06	0.67328	0.0013864	0.00408278	1	0	0	0	0	0	1	0	0	0	2
41193	DST	5.18804e-07	0.64278	0.949922	0.301352	0.00309283	0.261224	0.102919	4.84644e-07	0.540423	0.000152982	0.776907	0	0	0	0	0	0	1	0	1	0	2
15033	RPP25L	5.22865e-07	6.07511e-05	0.0471823	0.0171899	2.50795e-06	0.0127344	0.973136	0.682628	0.655312	0.00143706	0.778213	1	0	0	1	0	0	0	0	0	0	2
28008	TC248056	5.2412e-07	0.785774	0.993383	0.967832	0.000903296	0.573858	0.961537	1.34141e-06	0.968933	2.72679e-05	0.0224509	0	0	0	1	0	0	1	0	1	0	3
31725	PRKAG3	5.38674e-07	0.0989619	7.22523e-05	0.00325862	3.47623e-06	0.0468327	0.267562	0.00602216	0.881177	0.609376	0.949374	0	1	0	1	0	0	0	0	0	0	2
16680	ITGB2	5.45804e-07	0.925627	0.0293131	0.77133	1.9078e-05	0.0172173	0.900337	3.59512e-06	0.753622	0.0457829	0.0563732	0	0	0	1	0	0	1	0	0	0	2
36816	ZNF148	5.53303e-07	0.0356074	0.00190808	0.984395	6.3994e-07	0.581747	0.342833	0.0121818	0.266043	0.0727441	0.00185228	0	0	0	1	0	0	0	0	0	0	1
17311	RREB1	5.61826e-07	0.592702	0.642375	0.899953	0.00162768	0.0396965	0.956296	0.00661415	0.767658	2.61297e-07	0.108835	0	0	0	0	0	0	0	0	1	0	1
38290	ENPP1	5.72165e-07	0.444659	0.97377	0.66407	4.9248e-05	0.184194	0.994336	0.0015262	0.758984	5.28565e-07	0.128412	0	0	0	1	0	0	0	0	1	0	2
30009	MAPK6	5.80899e-07	0.683986	0.518073	0.643046	0.000985935	0.0675622	0.436354	0.00661679	0.945752	2.11031e-07	0.00243663	0	0	0	1	0	0	0	0	1	0	2
17761	VSIG4	5.99906e-07	0.461338	0.792202	0.586204	0.00236346	0.56856	0.971666	1.08066e-06	0.82834	1.62982e-05	0.00302495	0	0	0	0	0	0	1	0	1	0	2
3573	CPEB4	6.48947e-07	0.974082	0.516333	0.987481	0.000680173	0.415647	0.991615	8.48996e-05	0.821039	1.20547e-07	0.0537516	0	0	0	1	0	0	1	0	1	0	3
3890	EW005549	6.67183e-07	0.939233	0.929768	0.708912	6.73601e-05	0.767113	0.84139	2.39948e-05	0.763528	6.72877e-07	0.138075	0	0	0	1	0	0	1	0	1	0	3
25991	TEAD1	6.71968e-07	0.300445	0.629674	0.955577	0.00127537	0.0142453	0.78616	6.45777e-08	0.817105	0.00513961	0.0342887	0	0	0	0	0	0	1	0	0	0	1
34860	AK239333	6.95296e-07	0.684077	0.00924478	0.45689	4.57634e-05	0.0108056	0.82172	1.03713e-05	0.821797	0.0913972	0.170583	0	0	0	1	0	0	1	0	0	0	2
7939	WNK2	6.95296e-07	0.0724596	4.94239e-06	0.00100033	0.0135291	0.00232118	0.160586	0.717702	0.893457	0.0232341	0.166846	0	1	0	0	0	0	0	0	0	0	1
9045	LAPTM5	6.9613e-07	0.61819	0.0155291	0.795129	2.96792e-05	0.0391008	0.99729	2.83419e-05	0.649381	0.0578883	0.0331664	0	0	0	1	0	0	1	0	0	0	2
19344	TPR	7.05189e-07	0.457825	0.82417	0.470672	6.06632e-06	0.520705	0.924078	0.000281462	0.761201	1.47904e-06	0.169495	0	0	0	1	0	0	1	0	1	0	3
16605	MLL5	7.14585e-07	0.267837	0.533343	0.622622	1.10914e-05	0.495007	0.982861	0.000106606	0.935562	1.66304e-06	0.0438289	0	0	0	1	0	0	1	0	1	0	3
16645	RAB11FIP5	7.18206e-07	0.0466812	0.492593	0.401045	0.135916	0.134349	0.953969	6.6081e-07	0.840272	0.000849288	0.0191589	0	0	0	0	0	0	1	0	1	0	2
19814	CH242-15C8.2	7.51211e-07	0.612898	0.348744	0.75211	0.0139421	0.753448	0.993667	1.44805e-05	0.964586	7.09608e-07	0.01883	0	0	0	0	0	0	1	0	1	0	2
21567	MRPL16	7.53084e-07	0.0113729	0.890844	0.758227	0.333587	7.33767e-05	0.0228171	4.78681e-07	0.883512	0.361007	0.97231	0	0	0	0	1	0	1	0	0	0	2
6736	AJ943796	7.53084e-07	0.0105809	0.00173838	1.20569e-05	8.38785e-05	0.831787	0.049589	0.356411	0.179824	0.512041	0.113855	0	0	1	1	0	0	0	0	0	0	2
37668	FAM46C	7.70823e-07	1.4614e-05	0.615715	0.737162	0.703529	3.03254e-05	0.0952788	2.96605e-06	0.962073	0.79774	0.852663	1	0	0	0	1	0	1	0	0	0	3
40753	FDX1	7.90356e-07	0.143957	0.282703	0.478873	0.110325	9.53943e-06	0.0323235	1.91931e-06	0.953389	0.750833	0.991945	0	0	0	0	1	0	1	0	0	0	2
10754	ELP2	7.99093e-07	0.505703	0.0130975	0.256013	0.929834	7.84171e-07	0.0516594	0.308434	0.959206	0.000257481	0.132243	0	0	0	0	1	0	0	0	1	0	2
1014	ARF3	8.13872e-07	0.196066	0.32122	0.724098	2.47698e-06	0.757632	0.924468	0.000959173	0.9741	5.86451e-05	0.0313064	0	0	0	1	0	0	1	0	1	0	3
18037	BG610459	8.17104e-07	0.12664	0.553909	0.174307	0.0172398	0.00137559	0.00494837	3.08935e-07	0.65284	0.0955595	0.913153	0	0	0	0	0	0	1	0	0	0	1
10597	APBB1IP	8.59756e-07	0.820359	0.765637	0.949319	0.000632769	0.270283	0.866117	1.60117e-06	0.970432	0.000358524	0.0599423	0	0	0	1	0	0	1	0	1	0	3
2372	PSMC2	8.64413e-07	0.0352524	6.76609e-07	0.526878	4.40978e-05	0.0131293	0.877491	0.157394	0.252891	0.325074	0.239276	0	1	0	1	0	0	0	0	0	0	2
37107	AK240110	8.68705e-07	0.111807	0.525277	0.90216	0.00427831	0.000349773	0.670072	0.458142	0.730542	1.31063e-06	0.195171	0	0	0	0	1	0	0	0	1	0	2
29781	TEAD1	8.79139e-07	0.685683	0.616424	0.824579	0.000293067	0.107041	0.997126	5.57872e-07	0.708178	0.00114032	0.00467318	0	0	0	1	0	0	1	0	0	0	2
13217	TEF1	9.07612e-07	0.927311	0.799221	0.781098	0.000135671	0.535944	0.906532	4.23051e-06	0.750412	8.61814e-05	0.00200147	0	0	0	1	0	0	1	0	1	0	3
1472	WDFY1	9.10904e-07	0.151366	0.489216	0.340517	2.47698e-06	0.443384	0.973136	0.00225479	0.799925	1.30103e-05	0.206274	0	0	0	1	0	0	0	0	1	0	2
29962	CREB3	9.31151e-07	0.259753	1.01674e-05	0.0503327	0.325554	0.00174353	0.503248	0.724106	0.868611	6.09632e-05	0.182942	0	1	0	0	0	0	0	0	1	0	2
30383	AK233967	9.31151e-07	0.0717788	0.0243068	0.0395358	0.562942	0.872862	0.730181	0.000101418	0.806567	1.94599e-05	0.00282947	0	0	0	0	0	0	1	0	1	0	2
43827	TMSB10	9.34384e-07	0.825488	0.00478572	0.176558	0.00024578	0.00102661	0.39117	1.55915e-05	0.953395	0.354235	0.630134	0	0	0	1	0	0	1	0	0	0	2
14427	EIF1AX	9.49681e-07	0.936845	0.284667	0.835227	0.00294148	0.250747	0.838928	0.00027398	0.558627	8.20007e-08	0.264915	0	0	0	0	0	0	1	0	1	0	2
32387	AJ951403	9.49681e-07	0.741351	0.765637	0.962549	0.0010237	0.176879	0.956824	0.0015459	0.86386	8.30875e-07	0.059967	0	0	0	0	0	0	0	0	1	0	1
1294	Zbtb26	9.62461e-07	0.00427873	0.834192	0.0253961	8.04472e-05	0.00238323	0.903436	0.63553	0.177522	3.05651e-05	0.966359	0	0	0	1	0	0	0	0	1	0	2
36375	RAB10	9.6423e-07	0.953619	0.951824	0.909509	0.000158095	0.989353	0.919742	3.0126e-05	0.904661	1.03682e-05	0.00578826	0	0	0	1	0	0	1	0	1	0	3
7507	COIL	9.75607e-07	3.98699e-05	6.95069e-06	0.000455586	0.0066267	0.935997	0.738676	0.0930585	0.796571	0.0463983	0.0855485	1	1	1	0	0	0	0	0	0	0	3
13847	CD572619	9.78201e-07	0.374143	0.000462219	0.000996913	0.000966185	0.0105872	0.0313274	0.0263651	0.690587	0.819011	0.326876	0	1	1	1	0	0	0	0	0	0	3
3372	AUH	9.80939e-07	0.958053	0.650881	0.90905	0.00024578	0.393082	0.967276	6.735e-06	0.783224	0.000434441	0.00653943	0	0	0	1	0	0	1	0	1	0	3
22020	AK237116	9.85304e-07	0.530741	0.0315777	0.368438	2.59283e-05	0.127472	0.832417	5.97777e-05	0.950205	0.0236184	0.226091	0	0	0	1	0	0	1	0	0	0	2
19422	RGS5	9.93953e-07	0.939233	0.124467	0.0713345	2.4568e-05	0.0895938	0.12825	5.28059e-06	0.733753	0.00838133	0.825978	0	0	0	1	0	0	1	0	0	0	2
13792	FAM92A1	1.0119e-06	0.943962	0.597419	0.941485	0.000555508	0.335155	0.939194	0.000272314	0.931204	2.20097e-07	0.0200072	0	0	0	1	0	0	1	0	1	0	3
20853	UTP14A	1.01791e-06	0.88553	0.31395	0.525321	0.000253416	0.0421599	0.453673	5.43558e-07	0.96425	0.00486612	0.286616	0	0	0	1	0	0	1	0	0	0	2
1221	CD163	1.02361e-06	0.368783	0.666179	0.0684607	0.040446	0.597612	0.476405	3.28129e-05	0.409699	0.00039793	0.000129305	0	0	0	0	0	0	1	0	1	1	3
31120	ITGA2	1.02361e-06	0.963594	0.0670758	0.376217	6.31664e-05	0.0180824	0.490102	1.54446e-06	0.989435	0.0248331	0.31091	0	0	0	1	0	0	1	0	0	0	2
10446	CD300C	1.03306e-06	0.237487	3.30562e-05	0.0296586	2.67253e-05	0.00546446	0.435534	0.00486841	0.95456	0.981666	0.936898	0	1	0	1	0	0	0	0	0	0	2
29431	MCC	1.05111e-06	0.842305	0.228108	0.969119	0.0167708	0.0101421	0.974393	0.0118209	0.635971	7.74776e-08	0.181566	0	0	0	0	0	0	0	0	1	0	1
24684	ZNF713	1.07849e-06	0.745483	0.00897486	0.530472	6.88957e-05	0.00930175	0.840235	2.4473e-05	0.792126	0.160913	0.170948	0	0	0	1	0	0	1	0	0	0	2
44586	TUBA8	1.08331e-06	0.637547	0.0279865	0.931388	0.450145	6.31679e-06	0.941622	0.963162	0.275263	6.15281e-06	0.850433	0	0	0	0	1	0	0	0	1	0	2
16686	PTPN3	1.12893e-06	2.55079e-06	2.22015e-05	0.193796	0.00487479	0.428033	0.308217	0.0133168	0.675479	0.139558	0.91581	1	1	0	0	0	0	0	0	0	0	2
11142	TC256200	1.13173e-06	1.59009e-05	0.00636078	0.00264647	9.87392e-06	0.0305752	0.993667	0.967682	0.609772	0.0400775	0.960737	1	0	0	1	0	0	0	0	0	0	2
33971	MGST2	1.13173e-06	0.023483	0.834572	0.995784	0.246686	0.00291695	0.18127	1.08807e-07	0.933377	0.0252645	0.538966	0	0	0	0	0	0	1	0	0	0	1
27987	GLRX5	1.1575e-06	0.657559	0.618789	0.8224	0.000388425	0.096504	0.999046	6.50636e-07	0.707662	0.00154738	0.00525201	0	0	0	1	0	0	1	0	0	0	2
9545	UBE2D4	1.1575e-06	8.42768e-07	0.00164246	0.0440432	5.58453e-05	0.0461511	0.68342	0.238015	0.953328	0.505908	0.9251	1	0	0	1	0	0	0	0	0	0	2
5250	DN106183	1.16506e-06	0.00841055	0.877986	0.493594	0.00093582	6.01496e-05	0.686544	0.710527	0.732605	1.29802e-05	0.347331	0	0	0	1	1	0	0	0	1	0	3
38233	SLCO2B1	1.17396e-06	0.536291	0.32122	0.958672	0.00119891	0.00745178	0.893547	5.07668e-07	0.700631	0.0333757	0.0306439	0	0	0	0	0	0	1	0	0	0	1
9105	epn1	1.1946e-06	0.152263	0.111133	0.418658	0.367889	3.31105e-06	0.997126	0.432255	0.0905235	0.000158259	0.759384	0	0	0	0	1	0	0	0	1	0	2
36368	DN117148	1.20626e-06	0.430844	0.328214	0.118043	0.012818	0.000961519	0.00951069	8.26422e-07	0.686861	0.139823	0.921999	0	0	0	0	1	0	1	0	0	0	2
22398	CHD5	1.21712e-06	0.00284877	0.136932	0.524229	0.785317	0.0515498	0.54834	7.04125e-07	0.975786	0.00404364	0.264833	0	0	0	0	0	0	1	0	0	0	1
12597	E2F3	1.22679e-06	0.00346407	0.139932	0.0787895	4.00706e-06	0.114887	0.997738	0.199116	0.737215	0.000763384	0.597406	0	0	0	1	0	0	0	0	1	0	2
11774	ABCC8	1.24998e-06	0.724631	0.031888	0.965474	6.37935e-06	0.0889479	0.956296	2.4788e-05	0.566501	0.0236673	0.00802792	0	0	0	1	0	0	1	0	0	0	2
18538	CN158185	1.25285e-06	0.616665	0.706511	0.328996	0.00211415	0.85107	0.117182	0.0103616	0.291568	0.00254166	0.00016472	0	0	0	0	0	0	0	0	0	1	1
3590	BICC1	1.2884e-06	0.743076	0.630273	0.413414	0.00255325	0.0588315	0.216149	3.01058e-07	0.796571	0.00176908	0.573842	0	0	0	0	0	0	1	0	0	0	1
12693	CA3	1.29394e-06	3.28392e-05	4.26031e-06	0.00135575	3.64601e-06	0.954479	0.933986	0.789688	0.925261	0.820734	0.954215	1	1	0	1	0	0	0	0	0	0	3
22491	CLASP1	1.30646e-06	1.35121e-06	4.94239e-06	0.000534359	5.94268e-05	0.558965	0.974393	0.296187	0.84781	0.720815	0.584083	1	1	1	1	0	0	0	0	0	0	4
5547	BCKDHB	1.32443e-06	0.0545548	3.36755e-06	0.0540693	3.05673e-05	0.0148494	0.802256	0.0654305	0.817105	0.633656	0.863439	0	1	0	1	0	0	0	0	0	0	2
15903	HADHA	1.3398e-06	0.526157	7.83474e-05	0.0843224	0.614925	0.000524478	0.424028	0.742826	0.883486	2.82548e-05	0.139078	0	1	0	0	1	0	0	0	1	0	3
14584	C11orf1	1.37325e-06	0.733883	0.00648548	0.0368457	0.436267	0.0214522	0.163178	0.0832476	0.86386	2.43996e-06	0.00190015	0	0	0	0	0	0	0	0	1	0	1
10829	IVNS1ABP	1.3894e-06	0.101959	3.71868e-05	0.00297759	0.00316664	0.0204627	0.250534	0.386861	0.905389	0.216269	0.395239	0	1	0	0	0	0	0	0	0	0	1
42812	DDIT4L	1.39032e-06	0.381243	0.00510178	0.334123	8.07293e-07	0.108145	0.861952	7.79167e-05	0.897362	0.0372984	0.171121	0	0	0	1	0	0	1	0	0	0	2
4225	SLA-8	1.3921e-06	0.965551	0.000754693	0.118957	0.0260545	4.06485e-06	0.165194	0.00308761	0.918497	0.237364	0.876114	0	1	0	0	1	0	0	0	0	0	2
31835	CRIM1	1.39983e-06	0.00304571	6.96174e-07	0.0134451	0.000201922	0.0779544	0.897832	0.748954	0.865521	0.201859	0.925401	0	1	0	1	0	0	0	0	0	0	2
37406	U6	1.41114e-06	0.195177	0.378916	0.845836	2.47698e-06	0.688846	0.833144	0.00141049	0.925045	4.69038e-05	0.0153314	0	0	0	1	0	0	0	0	1	0	2
40645	HMOX1	1.41254e-06	0.0241372	0.615491	0.955577	0.912783	3.95977e-07	0.269238	0.000103222	0.796571	0.490851	0.884389	0	0	0	0	1	0	1	0	0	0	2
15489	frmd3	1.44891e-06	0.012398	0.306277	0.914821	0.150211	1.05687e-06	0.0997272	0.17947	0.855409	0.000287833	0.298014	0	0	0	0	1	0	0	0	1	0	2
2471	U6	1.46114e-06	0.473083	0.897216	0.591835	0.0120558	0.384075	0.973136	4.69036e-06	0.792393	0.000348901	0.0065532	0	0	0	0	0	0	1	0	1	0	2
26726	MAVS	1.46114e-06	0.00884805	0.0827292	0.560338	3.61684e-07	0.396105	0.717674	0.0367061	0.936886	0.000456382	0.0445581	0	0	0	1	0	0	0	0	1	0	2
33255	ZNF582	1.5232e-06	0.0184284	0.826235	0.965855	0.172925	0.00680907	0.142159	1.6231e-07	0.894946	0.0181111	0.579999	0	0	0	0	0	0	1	0	0	0	1
6978	RBM23	1.52705e-06	0.0568231	0.152758	0.222708	3.86428e-07	0.644143	0.984737	0.00417001	0.871151	0.000123027	0.216534	0	0	0	1	0	0	0	0	1	0	2
41836	TC275792	1.5324e-06	0.656311	0.639906	0.904654	0.00427831	0.966499	0.971666	6.99424e-06	0.964586	4.13272e-06	0.0335466	0	0	0	0	0	0	1	0	1	0	2
25428	RAPH1	1.54785e-06	0.602462	0.00648548	0.00450701	7.25945e-05	0.022557	0.0480079	0.000207673	0.680322	0.240198	0.850433	0	0	0	1	0	0	1	0	0	0	2
28600	AK235096	1.57719e-06	0.454818	0.708267	0.518789	0.0241471	0.612784	0.956369	6.33796e-06	0.821797	9.60781e-05	0.00604776	0	0	0	0	0	0	1	0	1	0	2
9645	ZNF211	1.59081e-06	0.00130903	0.925499	0.827024	0.827096	6.22978e-06	0.172578	2.74652e-05	0.91031	0.922992	0.896235	0	0	0	0	1	0	1	0	0	0	2
22848	CPNE2	1.59899e-06	0.109295	0.819544	0.000328741	0.000766793	0.105628	0.0582871	0.234498	0.0125772	0.000596027	0.178688	0	0	1	1	0	0	0	0	1	0	3
21498	NCAM1	1.68879e-06	0.191249	0.0107129	0.0377881	1.07992e-05	0.342216	0.534584	0.00257882	0.850473	0.0655144	0.823113	0	0	0	1	0	0	0	0	0	0	1
23574	SDCBP	1.70327e-06	5.27853e-06	0.0557226	0.153816	0.32647	0.0048067	0.539583	1.95896e-05	0.903463	0.252213	0.415492	1	0	0	0	0	0	1	0	0	0	2
1882	NAA50	1.70327e-06	0.32529	0.903369	0.79602	0.000426292	0.0677546	0.354448	0.0275136	0.903285	3.70438e-06	0.00393097	0	0	0	1	0	0	0	0	1	0	2
23701	TC267740	1.71046e-06	0.578911	0.0404938	0.025942	1.95671e-05	0.140226	0.179751	5.05673e-05	0.722262	0.0188471	0.896987	0	0	0	1	0	0	1	0	0	0	2
25175	WTAP	1.71046e-06	0.653373	0.000314809	0.653187	0.00154263	0.000170658	0.953969	0.00182581	0.464165	0.741479	0.280558	0	1	0	0	1	0	0	0	0	0	2
17608	C5orf42	1.71046e-06	0.0480248	0.557334	0.983985	0.00387926	0.000185582	0.30618	0.758957	0.871004	3.25618e-06	0.0841312	0	0	0	0	1	0	0	0	1	0	2
27098	MTHFR	1.71046e-06	0.00168787	0.108476	0.423761	2.26682e-06	0.114887	0.677544	0.264493	0.999939	0.00118657	0.127311	0	0	0	1	0	0	0	0	0	0	1
30827	CAMLG	1.71872e-06	1.02214e-05	0.0018308	0.0191454	0.000379244	0.144286	0.924078	0.253501	0.88259	0.826954	0.881631	1	0	0	1	0	0	0	0	0	0	2
21272	ARHGAP30	1.72635e-06	0.487275	0.00424	0.428392	3.05673e-05	0.0224478	0.89962	8.61803e-05	0.796571	0.154333	0.176815	0	0	0	1	0	0	1	0	0	0	2
30753	Actc1	1.77594e-06	0.0629587	0.000457698	0.443819	3.98274e-07	0.232706	0.96318	0.00355513	0.706192	0.142399	0.0821231	0	1	0	1	0	0	0	0	0	0	2
15653	SNTB1	1.78317e-06	0.581464	0.000372502	0.000931146	0.414418	0.00442112	0.0112242	0.998216	0.66173	0.00144064	0.00393097	0	1	1	0	0	0	0	0	0	0	2
11151	AJ955459	1.78317e-06	0.842305	0.000105106	0.00958682	0.0991259	0.000117475	0.0364373	0.19429	0.934625	0.0116655	0.146349	0	1	0	0	1	0	0	0	0	0	2
40196	TC248230	1.82216e-06	0.0236073	9.27707e-06	0.000247396	6.31664e-05	0.0870893	0.138026	0.250335	0.754345	0.629605	0.322725	0	1	1	1	0	0	0	0	0	0	3
33655	NT5DC3	1.82814e-06	0.345529	0.507585	0.108773	1.97892e-05	0.700715	0.634335	0.00020608	0.563693	1.19912e-05	0.544403	0	0	0	1	0	0	1	0	1	0	3
44217	CJ015707	1.82814e-06	0.596791	0.83043	0.79893	0.00065778	0.164446	0.551895	0.00622351	0.931204	2.87715e-06	0.00489457	0	0	0	1	0	0	0	0	1	0	2
18401	SFXN4	1.83107e-06	0.914307	0.000609266	0.781058	0.0144551	2.4298e-05	0.914978	0.00432926	0.380524	0.314286	0.416824	0	1	0	0	1	0	0	0	0	0	2
10636	HSD17B4	1.85283e-06	0.777471	0.228657	0.598107	4.40978e-05	0.32831	0.87062	1.50925e-05	0.987284	0.00153171	0.119004	0	0	0	1	0	0	1	0	0	0	2
9306	TC265898	1.98272e-06	0.989041	0.858069	0.175515	0.00943252	0.753513	0.213885	0.00218207	0.506101	0.000169617	0.00016472	0	0	0	0	0	0	0	0	1	1	2
14918	BI343700	1.98326e-06	0.982493	0.0108866	0.00140603	0.401747	0.000402992	0.00105011	0.238506	0.511936	0.0378084	0.0070709	0	0	0	0	1	0	0	0	0	0	1
43508	BTBD9	1.99954e-06	0.877425	0.372882	0.909077	0.00191044	0.0930194	0.993667	0.00284089	0.670697	1.20852e-07	0.161848	0	0	0	0	0	0	0	0	1	0	1
23046	S100A11	1.99954e-06	0.962521	0.00268521	0.667259	0.065762	4.01706e-06	0.686733	0.00429867	0.583451	0.219428	0.767109	0	0	0	0	1	0	0	0	0	0	1
5001	PARK2	2.01454e-06	0.121889	1.23618e-06	0.0166657	0.000585851	0.00292081	0.45519	0.182092	0.909877	0.11087	0.784678	0	1	0	1	0	0	0	0	0	0	2
10448	TC272198	2.01468e-06	0.25596	0.427479	0.540067	0.00793363	0.00266836	0.11631	0.323406	0.929261	2.75936e-06	0.00482766	0	0	0	0	0	0	0	0	1	0	1
18451	SFRS2IP	2.04499e-06	0.37231	0.432282	0.816584	0.048892	0.841857	0.929128	3.43443e-06	0.951403	1.07745e-05	0.059967	0	0	0	0	0	0	1	0	1	0	2
3968	TBC1D7	2.05852e-06	0.000162868	0.110338	0.187692	1.87158e-06	0.030772	0.767607	0.639134	0.87624	0.00132927	0.370896	1	0	0	1	0	0	0	0	0	0	2
624	UTP18	2.1487e-06	0.210125	1.76716e-05	0.000931146	0.000664996	0.00672551	0.0582871	0.0984794	0.810841	0.325478	0.282638	0	1	1	1	0	0	0	0	0	0	3
25892	GUSB	2.16938e-06	0.917568	0.266737	0.952931	0.00112913	0.034549	0.924078	4.51455e-06	0.794127	0.0235411	0.060962	0	0	0	0	0	0	1	0	0	0	1
13104	S100A11	2.21111e-06	0.986636	0.00171868	0.635744	0.0426069	6.86036e-06	0.716221	0.00438735	0.57551	0.25424	0.724718	0	0	0	0	1	0	0	0	0	0	1
16874	CELA2A	2.23331e-06	0.178163	2.47798e-06	0.0866339	0.138688	0.00215239	0.700622	0.894243	0.775609	0.000209484	0.434877	0	1	0	0	0	0	0	0	1	0	2
33425	TC274812	2.23331e-06	0.203207	0.896216	0.702826	0.000445041	0.0348073	0.179751	0.0788301	0.850473	5.19417e-06	0.00235267	0	0	0	1	0	0	0	0	1	0	2
11181	DB790720	2.23331e-06	0.549751	0.596907	0.69114	0.00228311	0.0253585	0.364906	2.21819e-07	0.947057	0.00509815	0.329294	0	0	0	0	0	0	1	0	0	0	1
35236	TC241675	2.26427e-06	0.0096525	5.7022e-07	0.0074998	0.000151905	0.0430275	0.694606	0.563525	0.936886	0.16578	0.784184	0	1	0	1	0	0	0	0	0	0	2
25253	TC275538	2.26427e-06	0.859034	0.825347	0.417684	0.00241491	0.308599	0.302557	1.34141e-06	0.714136	0.000249789	0.562605	0	0	0	0	0	0	1	0	1	0	2
39874	TC295547	2.26427e-06	0.00891986	0.718901	0.998248	0.150903	0.0120582	0.179183	1.14466e-07	0.908569	0.00881248	0.481038	0	0	0	0	0	0	1	0	0	0	1
39183	LCMT1	2.30042e-06	0.00164704	0.0266194	0.26987	0.947822	0.272355	0.784381	4.91228e-06	0.987284	0.00100611	0.14944	0	0	0	0	0	0	1	0	0	0	1
13430	C1QC	2.30999e-06	0.59333	0.525005	0.967832	4.88415e-05	0.984846	0.900332	0.000248178	0.881177	0.000154945	0.0132124	0	0	0	1	0	0	1	0	1	0	3
20489	SLC43A2	2.31172e-06	0.880612	0.0464586	0.0171899	0.688942	0.000771085	0.00667145	0.917016	0.655312	0.000256672	0.00167257	0	0	0	0	1	0	0	0	1	0	2
16358	SCYL1	2.31172e-06	0.953942	0.415073	0.639207	0.000378826	0.123366	0.661353	1.6796e-06	0.979071	0.00206741	0.206185	0	0	0	1	0	0	1	0	0	0	2
24399	TMSB4X	2.31894e-06	0.896701	0.491591	0.979721	0.000384143	0.138823	0.984737	2.98268e-06	0.796571	0.00257291	0.019404	0	0	0	1	0	0	1	0	0	0	2
7807	FOLR1	2.3297e-06	0.468629	0.540603	0.818297	0.0122175	0.00799467	0.961537	1.1942e-06	0.638153	0.0419804	0.0249877	0	0	0	0	0	0	1	0	0	0	1
43249	S100A16	2.33433e-06	0.605859	0.283593	0.735745	4.02512e-06	0.694189	0.987596	4.4657e-05	0.958109	0.000248492	0.0457186	0	0	0	1	0	0	1	0	1	0	3
39749	AMD1	2.3427e-06	0.000912396	0.0687033	0.310547	2.05732e-06	0.0570652	0.677671	0.199972	0.98631	0.000395246	0.11916	1	0	0	1	0	0	0	0	1	0	3
1750	PET112	2.39295e-06	0.927797	0.000369902	0.0998385	0.0134453	5.89177e-05	0.179751	0.00821155	0.927694	0.23107	0.849324	0	1	0	0	1	0	0	0	0	0	2
5413	F2R	2.46295e-06	0.925627	0.00674562	0.157442	0.0015989	0.000228111	0.135651	4.42448e-05	0.990889	0.837816	0.930574	0	0	0	0	1	0	1	0	0	0	2
23443	MAN2A2	2.47772e-06	2.99789e-05	0.115462	0.0170984	0.000160776	0.00364335	0.963917	0.540867	0.558627	0.0303607	0.931379	1	0	0	1	0	0	0	0	0	0	2
13838	TC256943	2.53644e-06	0.00873578	0.0307919	0.31406	2.47698e-06	0.584487	0.889026	0.0681253	0.979263	0.00583845	0.173537	0	0	0	1	0	0	0	0	0	0	1
25700	TUSC3	2.55252e-06	0.0462909	0.00232135	0.00450701	2.60743e-06	0.494116	0.450436	0.00432625	0.756412	0.0492511	0.936912	0	0	0	1	0	0	0	0	0	0	1
38582	NCAM1	2.56384e-06	0.0919052	6.66993e-06	0.152124	9.95336e-06	0.015248	0.901117	0.0205946	0.733753	0.890493	0.566264	0	1	0	1	0	0	0	0	0	0	2
39496	POP4	2.56384e-06	0.00202874	0.167674	0.911143	2.39452e-05	0.0346312	0.129347	0.412427	0.77223	0.00103601	0.00989771	0	0	0	1	0	0	0	0	0	0	1
27089	PROSC	2.62758e-06	5.5456e-05	0.00143692	0.00119986	2.03226e-06	0.410829	0.835368	0.809979	0.635971	0.162443	0.830366	1	0	0	1	0	0	0	0	0	0	2
21866	IFNGR2	2.69454e-06	0.281178	0.0665281	0.0424816	0.433063	0.618527	0.457448	0.00269083	0.736038	8.90618e-05	0.00185228	0	0	0	0	0	0	0	0	1	0	1
27703	MIPEP	2.70937e-06	0.942513	0.00477338	0.0203535	0.949049	0.000716196	0.0354322	0.956355	0.836217	0.000256681	0.0105217	0	0	0	0	1	0	0	0	1	0	2
30762	NLE1	2.79376e-06	0.496313	0.769596	0.781058	0.00228814	0.0528116	0.429715	0.0225052	0.939877	3.12064e-06	0.00618898	0	0	0	0	0	0	0	0	1	0	1
35776	MRPL13	2.85926e-06	0.00399696	0.980068	0.617126	0.988306	9.3838e-06	0.493052	2.14322e-05	0.720766	0.983771	0.509115	0	0	0	0	1	0	1	0	0	0	2
9276	SAMHD1	2.85926e-06	0.148798	0.272743	0.926118	0.0176819	0.00016973	0.383509	5.16749e-07	0.82834	0.330405	0.321358	0	0	0	0	1	0	1	0	0	0	2
11571	ADPRHL1	2.86156e-06	0.232777	0.00020366	0.45689	0.811464	0.00889399	0.993667	0.124777	0.57551	7.71785e-06	0.501754	0	1	0	0	0	0	0	0	1	0	2
11232	TC298740	2.86156e-06	0.0736509	0.000315716	0.161973	0.947134	0.169032	0.933158	0.00842949	0.87624	3.55232e-06	0.0844008	0	1	0	0	0	0	0	0	1	0	2
9083	COIL	2.8745e-06	0.0370386	0.0789305	0.362013	2.47698e-06	0.677589	0.953969	0.01223	0.995799	0.00106635	0.130449	0	0	0	1	0	0	0	0	0	0	1
43061	SPARCL1	2.90683e-06	0.000149957	0.676457	0.681169	0.522603	0.000241571	0.0012994	0.000195569	0.607838	0.958049	0.286616	1	0	0	0	1	0	1	0	0	0	3
18832	HIST1H2BF	2.91318e-06	1.2902e-05	0.00732056	0.320728	0.00401343	0.0441036	0.327903	0.0561157	0.902663	0.954794	0.812023	1	0	0	0	0	0	0	0	0	0	1
26532	TEAD1	2.91588e-06	0.116735	0.929768	0.563993	0.0226095	0.0181289	0.957772	3.98093e-07	0.659575	0.0119187	0.0118945	0	0	0	0	0	0	1	0	0	0	1
21599	TC289180	2.92495e-06	0.762665	0.930863	0.669884	0.00383046	0.350028	0.473103	1.40659e-06	0.80542	0.000182666	0.361363	0	0	0	0	0	0	1	0	1	0	2
43069	TWISTNB	2.96079e-06	2.01853e-05	9.97734e-05	0.190861	1.27411e-05	0.570437	0.505364	0.922764	0.774938	0.656553	0.385074	1	1	0	1	0	0	0	0	0	0	3
15975	UTP14A	3.01473e-06	0.84624	0.486179	0.77133	0.000670722	0.0810311	0.68064	1.05342e-06	0.989583	0.00301086	0.160069	0	0	0	1	0	0	1	0	0	0	2
10360	CD163	3.01473e-06	0.485152	0.954074	0.661672	0.0205522	0.252454	0.993667	2.84834e-06	0.796571	0.000762847	0.0111385	0	0	0	0	0	0	1	0	1	0	2
26814	ATP6V1C1	3.07453e-06	0.00117644	0.962548	0.939355	0.518813	1.65627e-06	0.0927846	0.000594633	0.92853	0.294361	0.885193	0	0	0	0	1	0	1	0	0	0	2
39883	CD302	3.10342e-06	0.918597	0.964665	0.737162	0.000322762	0.76376	0.882603	7.43874e-05	0.796571	3.75373e-06	0.1625	0	0	0	1	0	0	1	0	1	0	3
23341	TC290251	3.18238e-06	0.964136	0.205603	0.757742	0.000183868	0.047144	0.786832	2.28097e-06	0.907765	0.0106966	0.111436	0	0	0	1	0	0	1	0	0	0	2
14424	EW188873	3.27913e-06	0.537573	0.834787	0.115608	0.00106246	0.118726	0.495715	0.0121389	0.174337	4.11663e-06	0.951675	0	0	0	0	0	0	0	0	1	0	1
6070	ALDH4A1	3.27913e-06	0.00148767	0.25575	0.689151	3.81175e-05	0.0191598	0.363831	0.629996	0.963994	0.00120497	0.0841312	0	0	0	1	0	0	0	0	0	0	1
40007	NID1	3.2876e-06	0.726928	0.000267919	0.175515	0.0524461	2.1378e-05	0.458231	0.0691357	0.81198	0.0632894	0.889149	0	1	0	0	1	0	0	0	0	0	2
6065	EW161078	3.48712e-06	1.97478e-06	0.00501971	0.113885	0.00379118	0.026142	0.501341	0.019499	0.991781	0.973433	0.978052	1	0	0	0	0	0	0	0	0	0	1
19769	PTEN	3.49622e-06	0.764874	0.00284821	0.181418	2.12466e-05	0.00789187	0.456955	5.9542e-05	0.952324	0.306709	0.573838	0	0	0	1	0	0	1	0	0	0	2
15429	EW148700	3.50614e-06	0.0658286	0.375814	0.40343	0.020684	6.76997e-05	0.98017	0.9738	0.234438	8.60948e-06	0.931744	0	0	0	0	1	0	0	0	1	0	2
8276	FAM151B	3.55254e-06	0.275946	0.00574598	0.878361	7.25945e-05	0.150221	0.83853	0.00623008	0.511936	0.293557	0.0388371	0	0	0	1	0	0	0	0	0	0	1
16624	MYST4	3.60528e-06	0.277904	0.771833	0.967717	0.0247365	0.0076142	0.53028	3.01058e-07	0.953389	0.0196124	0.221272	0	0	0	0	0	0	1	0	0	0	1
24801	THBS2	3.62374e-06	0.0388531	0.488951	0.925756	0.871821	8.00654e-07	0.12825	0.000261688	0.895679	0.385129	0.965365	0	0	0	0	1	0	1	0	0	0	2
18626	nsfl1c	3.62423e-06	0.569308	0.287237	0.918512	0.0112389	0.00740291	0.700622	0.0957082	0.840026	6.95277e-07	0.0711954	0	0	0	0	0	0	0	0	1	0	1
9551	HIST1H2BD	3.66581e-06	0.5952	0.0141397	0.414999	0.648365	2.13297e-05	0.179751	0.802252	0.891436	4.22412e-05	0.141818	0	0	0	0	1	0	0	0	1	0	2
10545	GLUD1	3.69476e-06	2.34704e-06	0.000143404	0.0440432	1.41245e-05	0.338102	0.785444	0.560339	0.982956	0.761242	0.88062	1	1	0	1	0	0	0	0	0	0	3
20294	WAC	3.70805e-06	0.281928	0.0623492	0.274719	0.241432	0.602808	0.877491	0.000579749	0.972399	1.02683e-05	0.0157471	0	0	0	0	0	0	1	0	1	0	2
38500	NUDT15	3.7646e-06	0.000932442	0.873521	0.876887	0.460269	2.55754e-05	0.00951069	0.000770414	0.838238	0.550902	0.469501	1	0	0	0	1	0	1	0	0	0	3
25722	HMOX1	3.77062e-06	0.107324	0.360471	0.912242	0.646366	1.06083e-06	0.217752	0.000225725	0.858199	0.493682	0.960135	0	0	0	0	1	0	1	0	0	0	2
26811	RPL14	3.77062e-06	0.272155	0.755057	0.479757	0.000119434	0.203255	0.992143	0.00135415	0.783224	2.77839e-06	0.19172	0	0	0	1	0	0	0	0	1	0	2
965	OPCML	3.77062e-06	0.0283272	0.00209019	0.161973	2.71722e-07	0.65309	0.984804	0.00858798	0.952352	0.0400775	0.271016	0	0	0	1	0	0	0	0	0	0	1
23621	DCUN1D2	3.79465e-06	0.769186	0.0665281	0.64324	0.0771368	0.126025	0.900635	0.00405326	0.883512	6.252e-07	0.0473558	0	0	0	0	0	0	0	0	1	0	1
8420	CA3	3.84184e-06	8.81944e-05	0.000175411	0.00395807	4.81961e-05	0.753931	0.95956	0.933517	0.865521	0.832404	0.86468	1	1	0	1	0	0	0	0	0	0	3
25565	SESN1	3.8479e-06	0.957914	0.0317001	0.828444	0.000384083	0.00541315	0.919742	1.38588e-05	0.67328	0.177399	0.0858055	0	0	0	1	0	0	1	0	0	0	2
22352	CCNG2	3.8479e-06	0.327383	0.128877	0.859059	0.184238	2.13297e-05	0.407722	0.97788	0.792126	1.22667e-05	0.223875	0	0	0	0	1	0	0	0	1	0	2
16456	KLHL29	3.86134e-06	0.587392	0.043311	0.143087	0.466337	4.85277e-06	0.0233291	0.0150347	0.919058	0.100344	0.325809	0	0	0	0	1	0	0	0	0	0	1
37081	SLA-DMB	3.92309e-06	0.939233	0.187778	0.596744	0.000169654	0.0857422	0.745677	3.76628e-06	0.970432	0.00670534	0.175309	0	0	0	1	0	0	1	0	0	0	2
25850	TAX1BP1	3.94553e-06	0.989334	0.639416	0.792458	0.00159339	0.531329	0.861952	0.000317005	0.982398	1.93003e-06	0.00917514	0	0	0	0	0	0	1	0	1	0	2
21614	DR083052	4.01062e-06	0.490515	0.742067	0.47657	4.7911e-05	0.618323	0.924078	0.000339422	0.796086	8.66017e-06	0.201874	0	0	0	1	0	0	1	0	1	0	3
40156	CK450094	4.01403e-06	0.014896	0.845254	0.482353	4.68509e-05	0.00908115	0.835768	0.294674	0.758261	1.31979e-05	0.278332	0	0	0	1	0	0	0	0	1	0	2
28590	Fam83h	4.01799e-06	0.926469	0.00297322	0.897439	0.62032	0.000180777	0.974393	0.78147	0.159034	3.71773e-06	0.980698	0	0	0	0	1	0	0	0	1	0	2
40128	DB789514	4.07268e-06	0.62876	0.00269312	0.820966	0.947065	4.85277e-06	0.614516	0.497435	0.538005	6.58982e-05	0.73144	0	0	0	0	1	0	0	0	1	0	2
27153	DN113733	4.0781e-06	3.71428e-05	0.16263	0.0757887	0.000734184	0.000514513	0.777914	0.328246	0.708178	0.0322003	0.95153	1	0	0	1	1	0	0	0	0	0	3
10362	YAP1	4.15302e-06	0.477445	0.0222142	0.323447	0.0156855	3.02652e-05	0.0871755	2.63477e-05	0.969804	0.950526	0.967511	0	0	0	0	1	0	1	0	0	0	2
30384	PPP1R3G	4.22221e-06	0.880874	0.254443	0.0556889	0.066117	0.303652	0.133782	0.00942724	0.583451	2.20688e-05	0.00016472	0	0	0	0	0	0	0	0	1	1	2
19505	PPARGC-1	4.27576e-06	0.124895	0.620282	0.106247	6.63369e-05	0.107073	0.830619	0.00458351	0.499488	3.53099e-06	0.608019	0	0	0	1	0	0	0	0	1	0	2
19847	TC294587	4.27971e-06	0.0908356	0.185688	0.469565	5.48289e-06	0.587565	0.954894	0.000934106	0.987715	3.89877e-05	0.0649381	0	0	0	1	0	0	1	0	1	0	3
33163	EIF4ENIF1	4.27971e-06	0.203812	0.238127	0.985544	2.53381e-05	0.8782	0.609308	0.00354144	0.733753	0.000914888	0.0055372	0	0	0	1	0	0	0	0	1	0	2
14913	SVIL	4.27971e-06	0.293746	0.830298	0.507019	0.0120245	0.309128	0.984737	2.40696e-06	0.778703	0.000308639	0.00515221	0	0	0	0	0	0	1	0	1	0	2
36251	AK239728	4.31357e-06	0.905123	0.00141839	0.777924	0.925025	0.000329271	0.919742	0.695853	0.504932	1.04123e-05	0.644852	0	0	0	0	1	0	0	0	1	0	2
9156	TC289689	4.36114e-06	0.00724718	3.1672e-05	0.0650279	1.01156e-06	0.325908	0.962877	0.0827515	0.902199	0.583814	0.610526	0	1	0	1	0	0	0	0	0	0	2
33370	GAR1	4.40735e-06	0.984094	0.0509917	0.19823	0.347472	0.00555871	0.251613	0.171186	0.948152	7.68812e-06	0.0111504	0	0	0	0	0	0	0	0	1	0	1
4930	tpp2	4.4306e-06	0.94103	0.000315046	0.181026	0.0401829	1.2554e-05	0.179751	0.00926062	0.859256	0.0840099	0.844531	0	1	0	0	1	0	0	0	0	0	2
13080	5S_rRNA	4.46582e-06	0.000524697	0.416221	0.49378	0.00032307	0.00148516	0.44258	0.891315	0.916422	0.00249775	0.334342	1	0	0	1	0	0	0	0	0	0	2
30631	PDCD2	4.50061e-06	0.013241	0.921989	0.981225	0.00120398	0.000665144	0.244568	0.84687	0.953388	3.16908e-05	0.0748056	0	0	0	0	1	0	0	0	1	0	2
35429	U6	4.50204e-06	0.782358	0.0723613	0.417698	0.109055	0.118724	0.731498	0.00636972	0.982561	1.45438e-06	0.0177646	0	0	0	0	0	0	0	0	1	0	1
29418	ST3GAL4	4.58637e-06	0.159197	0.965984	0.864994	0.01197	0.0689741	0.302691	3.03611e-07	0.883512	0.00153171	0.37095	0	0	0	0	0	0	1	0	0	0	1
2188	HSD11B1	4.59752e-06	0.581089	0.00585944	0.548663	0.978682	5.54663e-06	0.27992	0.3797	0.781971	0.000249789	0.434528	0	0	0	0	1	0	0	0	1	0	2
32680	TMSB10	4.60283e-06	0.839642	0.00663291	0.639207	0.000789268	0.00174353	0.860862	0.000107728	0.700631	0.538681	0.239355	0	0	0	1	0	0	1	0	0	0	2
5909	LUC7L	4.62525e-06	0.10838	0.703209	0.87625	4.7738e-05	0.171086	0.257333	0.0466598	0.783224	6.68546e-05	0.0028868	0	0	0	1	0	0	0	0	1	0	2
35655	fam69a	4.66512e-06	0.536313	0.973697	0.959967	0.00182036	0.373512	0.893649	1.64598e-06	0.975802	0.000124754	0.0440108	0	0	0	0	0	0	1	0	1	0	2
10871	acp6	4.70688e-06	0.18734	0.0065499	0.00729675	3.25752e-05	0.212212	0.261292	0.00133076	0.724534	0.0812919	0.997813	0	0	0	1	0	0	0	0	0	0	1
11852	TC301164	4.72853e-06	0.224561	0.828276	0.96871	0.055361	0.00426433	0.462538	3.05567e-07	0.969921	0.0293532	0.298014	0	0	0	0	0	0	1	0	0	0	1
12273	SUN2	4.7295e-06	0.0128021	0.175104	0.0953714	4.01256e-06	0.127079	0.992143	0.0233177	0.736083	4.20391e-05	0.402717	0	0	0	1	0	0	0	0	1	0	2
10583	RGS10	4.73922e-06	0.969537	0.19951	0.977549	0.00126509	0.0404384	0.995909	2.39948e-05	0.638049	0.0514713	0.0279196	0	0	0	0	0	0	1	0	0	0	1
33744	EW198790	4.78497e-06	0.0337672	0.761956	0.49378	0.630986	6.45944e-05	0.00755924	4.62623e-05	0.796571	0.94954	0.659255	0	0	0	0	1	0	1	0	0	0	2
13807	PPARGC-1	4.79474e-06	0.119719	0.603702	0.101325	6.70789e-05	0.107241	0.825946	0.00518833	0.498245	4.11663e-06	0.624649	0	0	0	1	0	0	0	0	1	0	2
2231	SORBS1	4.8074e-06	2.98675e-05	0.175104	0.870438	0.000300607	0.00394896	0.0528202	0.430659	0.826205	0.0378265	0.101219	1	0	0	1	0	0	0	0	0	0	2
11650	CYP51	4.88755e-06	0.0277859	0.000764591	0.381556	2.67581e-06	0.422936	0.914978	0.0116078	0.732435	0.130041	0.101352	0	1	0	1	0	0	0	0	0	0	2
42555	TC273519	4.90719e-06	0.0810849	0.991529	0.782095	0.0030209	0.00302073	0.713346	0.351874	0.835139	3.30243e-05	0.218073	0	0	0	0	0	0	0	0	1	0	1
26378	CALM1	4.9078e-06	0.395906	0.566497	0.97458	0.0116587	0.00174155	0.757274	0.0907242	0.797341	7.47528e-07	0.120692	0	0	0	0	0	0	0	0	1	0	1
5597	HMOX1	4.96641e-06	0.0899254	0.393093	0.965474	0.662499	1.52567e-06	0.267562	0.000203823	0.821797	0.525177	0.911892	0	0	0	0	1	0	1	0	0	0	2
22135	U6	4.96771e-06	0.950599	0.910441	0.546652	0.000108478	0.959872	0.700622	3.31517e-05	0.767658	1.69826e-05	0.28179	0	0	0	1	0	0	1	0	1	0	3
8456	DNAJA1	4.99968e-06	0.0713599	0.688373	0.801618	5.58453e-05	0.0878633	0.708288	0.0603532	0.977666	3.84919e-05	0.0599423	0	0	0	1	0	0	0	0	1	0	2
14454	BRD8	5.04156e-06	0.065438	0.323133	0.764988	0.197202	2.35713e-06	0.717858	0.405583	0.484551	0.000268593	0.884306	0	0	0	0	1	0	0	0	1	0	2
35022	TGFBRAP1	5.04387e-06	0.0449938	0.397616	0.989142	0.163899	2.35713e-06	0.306164	0.361041	0.771585	0.000358524	0.481774	0	0	0	0	1	0	0	0	1	0	2
36136	ALDH4A1	5.04387e-06	0.0020785	0.27833	0.741513	7.21241e-05	0.0205389	0.32909	0.675414	0.94447	0.00179248	0.0814689	0	0	0	1	0	0	0	0	0	0	1
33244	LGMN	5.09922e-06	0.0112078	2.10113e-05	0.00118022	0.0211058	0.176233	0.410245	0.641016	0.850473	0.0283502	0.107282	0	1	0	0	0	0	0	0	0	0	1
40057	MTHFR	5.11682e-06	0.0005481	0.0720543	0.0377276	3.81247e-05	0.0272789	0.979865	0.714114	0.708391	0.00549907	0.820848	1	0	0	1	0	0	0	0	0	0	2
2488	CLIC2	5.12283e-06	0.0686053	0.940851	0.92111	0.281247	0.000604748	0.17603	1.14861e-06	0.964586	0.167802	0.731357	0	0	0	0	1	0	1	0	0	0	2
29671	SEP8	5.14268e-06	0.12321	0.415073	0.976601	1.18873e-05	0.478384	0.44258	0.0143739	0.776031	0.000204393	0.00425328	0	0	0	1	0	0	0	0	1	0	2
2783	HSP70.2	5.14314e-06	0.00427873	0.320957	0.192082	8.46526e-06	0.0484921	0.943359	0.277611	0.775609	0.000258478	0.448815	0	0	0	1	0	0	0	0	1	0	2
28426	MARC2	5.16242e-06	0.000693078	0.111455	0.175515	1.82335e-05	0.0361904	0.819642	0.637992	0.869996	0.00331907	0.452134	1	0	0	1	0	0	0	0	0	0	2
2796	PIK3R4	5.16242e-06	0.123378	0.871816	0.368826	0.0636825	0.0828556	0.0199269	2.55389e-06	0.49326	0.0056326	0.965365	0	0	0	0	0	0	1	0	0	0	1
27718	MLL5	5.16664e-06	0.752902	0.473957	0.129037	0.0675778	0.747879	0.383509	0.00190642	0.635971	0.000141744	0.000751306	0	0	0	0	0	0	0	0	1	1	2
20110	AKIRIN1	5.16664e-06	0.0181943	0.00151059	0.143087	0.900738	0.673148	0.997738	0.00105672	0.931204	5.826e-05	0.114631	0	0	0	0	0	0	0	0	1	0	1
29076	MTHFR	5.26117e-06	0.0191989	8.53969e-07	0.129909	0.0171348	0.0296485	0.983743	0.815542	0.655312	0.00376947	0.85863	0	1	0	0	0	0	0	0	0	0	1
20717	TC249175	5.36671e-06	0.17135	0.773598	0.800454	0.125456	0.0742599	0.166355	4.77374e-07	0.722167	0.00166789	0.71678	0	0	0	0	0	0	1	0	0	0	1
13253	PWP1	5.6081e-06	0.00792409	0.899942	0.121955	0.104729	1.43777e-05	0.991615	0.158433	0.193964	0.00910638	0.641503	0	0	0	0	1	0	0	0	0	0	1
39507	TRIM24	5.75725e-06	0.00354977	1.11593e-05	0.00391907	6.63369e-05	0.306517	0.713346	0.612217	0.953388	0.673423	0.784529	0	1	0	1	0	0	0	0	0	0	2
41107	Ndrg2	5.79394e-06	0.540505	0.0513384	0.347053	0.210179	0.223775	0.805001	0.00295309	0.989583	3.25618e-06	0.0203649	0	0	0	0	0	0	0	0	1	0	1
19450	CCND2	5.85916e-06	0.884117	0.0226548	0.275435	0.000564633	0.00593968	0.465884	3.75432e-05	0.975402	0.234635	0.593898	0	0	0	1	0	0	1	0	0	0	2
10325	NFRKB	6.00232e-06	0.521602	0.714829	0.969414	4.06512e-05	0.746904	0.755704	0.00101779	0.8643	4.48132e-05	0.00671963	0	0	0	1	0	0	0	0	1	0	2
4310	CHCHD3	6.05034e-06	0.759462	0.996565	0.782095	0.00528195	0.514685	0.974393	5.91068e-06	0.82834	0.000192089	0.00934354	0	0	0	0	0	0	1	0	1	0	2
37763	CH242-58J12.2	6.10625e-06	0.995478	0.764754	0.35241	0.00365582	0.674978	0.435772	0.00098311	0.708178	2.39111e-05	0.000636295	0	0	0	0	0	0	1	0	1	1	3
17300	PVALB1	6.12893e-06	0.00409677	2.81667e-05	0.519681	0.352761	0.408581	0.691293	0.0184851	0.50993	0.000168949	0.845559	0	1	0	0	0	0	0	0	1	0	2
16646	GMFG	6.35644e-06	0.863731	0.0606377	0.976074	0.000423144	0.0476237	0.97663	0.000156931	0.573123	0.121946	0.0325271	0	0	0	1	0	0	1	0	0	0	2
29700	PPARGC-1	6.46889e-06	0.135412	0.626931	0.108322	8.84162e-05	0.118724	0.819906	0.00514467	0.504932	5.00648e-06	0.630134	0	0	0	1	0	0	0	0	1	0	2
38546	ARNTL	6.57303e-06	0.916036	0.562401	0.987297	0.000736827	0.206335	0.964337	7.44264e-06	0.86222	0.00251679	0.039506	0	0	0	1	0	0	1	0	0	0	2
9220	CD1.1	6.60027e-06	0.495393	0.00204957	0.813145	1.92053e-05	0.0305542	0.979865	0.000601588	0.529145	0.344251	0.0514437	0	0	0	1	0	0	1	0	0	0	2
7254	TC262018	6.60027e-06	0.0126541	0.279137	0.605098	0.400833	0.128589	0.700622	2.41152e-06	0.996487	0.00252511	0.161317	0	0	0	0	0	0	1	0	0	0	1
10593	TC286904	6.62951e-06	0.267785	0.378199	0.362037	0.0338177	0.00103001	0.0446001	4.51167e-06	0.858583	0.30371	0.980663	0	0	0	0	0	0	1	0	0	0	1
38262	ACTR10	6.6505e-06	0.765119	0.083672	0.787765	0.227359	0.000343834	0.975381	0.430862	0.240629	4.11663e-06	0.872897	0	0	0	0	1	0	0	0	1	0	2
5229	PSMA4	6.73088e-06	0.000695445	0.000169646	0.00336222	4.27257e-05	0.950913	0.834499	0.828376	0.850818	0.866845	0.819313	1	1	0	1	0	0	0	0	0	0	3
26656	PPARGC-1	6.74851e-06	0.145	0.658457	0.108773	0.000108478	0.112701	0.811887	0.00549169	0.490134	4.95053e-06	0.646856	0	0	0	1	0	0	0	0	1	0	2
33599	OPTN	6.74851e-06	0.954897	0.00107959	0.0224441	0.660204	0.000374007	0.0387689	0.752703	0.906423	0.000718466	0.0357435	0	0	0	0	1	0	0	0	1	0	2
19853	HOXA4	6.83815e-06	7.26572e-05	1.67488e-05	0.000812835	0.00163898	0.958962	0.83568	0.314612	0.817105	0.337072	0.351153	1	1	1	0	0	0	0	0	0	0	3
38952	BLMH	6.85774e-06	0.93884	0.00410426	0.335524	0.654717	0.000324892	0.332035	0.792272	0.883512	8.1124e-06	0.10157	0	0	0	0	1	0	0	0	1	0	2
27452	GP91-PHOX	7.07091e-06	0.909635	0.0745066	0.969414	4.9514e-05	0.0700246	0.993667	2.91209e-05	0.648812	0.0355294	0.0206449	0	0	0	1	0	0	1	0	0	0	2
20940	TC295056	7.07091e-06	2.98675e-05	0.0284231	0.281147	0.00313163	0.0202799	0.434547	0.114823	0.987284	0.581044	0.822453	1	0	0	0	0	0	0	0	0	0	1
28952	CASKIN2	7.1792e-06	0.321721	0.590515	0.989966	0.0121318	0.0085412	0.70615	1.34141e-06	0.845819	0.0491192	0.131038	0	0	0	0	0	0	1	0	0	0	1
44581	fam168b	7.20061e-06	0.000524697	0.000126424	0.0010199	0.000211464	0.954077	0.684072	0.923569	0.756412	0.843784	0.434877	1	1	0	1	0	0	0	0	0	0	3
38660	CD2BP2	7.2709e-06	0.000168053	0.00924116	0.136496	1.24059e-06	0.255322	0.834491	0.574642	0.979444	0.0292735	0.427456	1	0	0	1	0	0	0	0	0	0	2
30581	TGM1	7.28027e-06	0.957456	0.91814	0.29714	0.000830088	0.953255	0.407722	4.16428e-05	0.558627	4.20391e-05	0.648744	0	0	0	1	0	0	1	0	1	0	3
7624	PIP4K2A	7.29281e-06	0.373904	0.947603	0.96663	0.0194242	0.205349	0.63624	3.59512e-06	0.944302	0.00139252	0.235714	0	0	0	0	0	0	1	0	0	0	1
27250	SEMA5A	7.48538e-06	0.738102	0.898476	0.522115	0.000210091	0.720376	0.838928	0.000220673	0.75331	1.11198e-05	0.273166	0	0	0	1	0	0	1	0	1	0	3
32917	ATF1	7.66604e-06	0.46543	0.036763	0.0949191	4.37497e-06	0.27414	0.481863	0.000196476	0.863588	0.0151443	0.636205	0	0	0	1	0	0	1	0	0	0	2
6787	AK230743	7.66604e-06	0.837178	0.00145078	0.0170559	0.106098	0.000739048	0.0582871	0.169701	0.886357	0.0728367	0.215127	0	0	0	0	1	0	0	0	0	0	1
22530	MVK	7.81211e-06	0.117011	0.410039	0.701335	0.164757	0.407069	0.866117	9.33527e-06	0.999646	0.000553476	0.102567	0	0	0	0	0	0	1	0	1	0	2
7373	PRDX1	7.96015e-06	0.275437	0.0297696	0.571942	0.316032	0.448437	0.139754	0.00194802	0.0905235	9.40886e-06	0.905003	0	0	0	0	0	0	0	0	1	0	1
792	ARRDC2	8.05966e-06	0.0017325	0.881572	0.707968	0.00348718	0.000218695	0.383509	0.65544	0.858605	0.00129399	0.395239	0	0	0	0	1	0	0	0	0	0	1
26996	CD572099	8.07429e-06	0.544855	0.0495998	0.260355	0.565693	0.000114308	0.0711285	0.823249	0.978294	0.000202679	0.053161	0	0	0	0	1	0	0	0	1	0	2
15070	TC277629	8.07429e-06	0.300445	0.894041	0.841793	0.00123849	0.025431	0.874856	0.032214	0.817105	2.42356e-06	0.121002	0	0	0	0	0	0	0	0	1	0	1
37883	THAP5	8.0868e-06	0.891341	0.282703	0.727809	0.0001689	0.0633058	0.684195	2.98621e-06	0.96425	0.00915283	0.174335	0	0	0	1	0	0	1	0	0	0	2
17513	CIZ1	8.0868e-06	0.9767	0.492593	0.0451571	0.000726055	0.350015	0.0642149	8.79945e-05	0.437558	0.00525864	0.946245	0	0	0	1	0	0	1	0	0	0	2
11540	AGXT2L2	8.14583e-06	0.00042224	0.000272707	0.00149608	7.30308e-06	0.90186	0.792663	0.534946	0.771046	0.367234	0.894745	1	1	0	1	0	0	0	0	0	0	3
32341	TC274088	8.29757e-06	0.905123	0.641562	0.874469	0.00368609	0.728172	0.973818	0.000181742	0.983114	5.36298e-06	0.0285984	0	0	0	0	0	0	1	0	1	0	2
7682	CYTH4	8.29757e-06	0.822623	0.159469	0.903024	0.00658437	0.00395044	0.811417	1.62104e-05	0.775609	0.218537	0.184979	0	0	0	0	0	0	1	0	0	0	1
17944	NCK2	8.31195e-06	0.0407011	0.525277	0.835375	0.153015	1.2554e-05	0.0927425	0.361451	0.969804	0.00118211	0.184106	0	0	0	0	1	0	0	0	0	0	1
42879	TMEM47	8.42241e-06	0.718445	0.00661801	0.169808	0.462636	0.0239628	0.467669	0.0873271	0.990445	3.25618e-06	0.0203229	0	0	0	0	0	0	0	0	1	0	1
33429	prex1	8.42496e-06	0.977697	0.0660778	0.726492	0.000979238	0.00827292	0.811417	1.52124e-05	0.812191	0.132163	0.191062	0	0	0	1	0	0	1	0	0	0	2
31670	PUM2	8.43114e-06	0.602614	0.737279	0.980407	0.0118147	0.800742	0.882793	1.65173e-05	0.931031	5.31393e-05	0.108494	0	0	0	0	0	0	1	0	1	0	2
4520	SLC7A10	8.48022e-06	0.154857	0.969202	0.885839	0.0156507	0.0393413	0.328248	4.67683e-07	0.929261	0.00491935	0.370223	0	0	0	0	0	0	1	0	0	0	1
37634	CLP1	8.73571e-06	0.0629708	0.00407414	0.0776334	9.09983e-06	0.510327	0.851389	0.0112881	0.972471	0.0930125	0.606754	0	0	0	1	0	0	0	0	0	0	1
33586	TRAK1	8.73571e-06	0.171884	0.572262	0.697303	0.00845824	0.00112691	0.921343	0.429307	0.558627	5.15441e-06	0.503453	0	0	0	0	0	0	0	0	1	0	1
33435	C5orf35	8.75387e-06	0.34745	0.000314809	0.108773	0.00131083	0.010447	0.632351	0.0453271	0.907765	0.665762	0.966416	0	1	0	0	0	0	0	0	0	0	1
21691	C21orf59	8.77881e-06	0.986636	0.0214403	0.878833	0.389051	0.00104254	0.91609	0.280338	0.57551	2.62425e-06	0.413283	0	0	0	0	0	0	0	0	1	0	1
32801	EMC3	9.23498e-06	0.578096	0.0202677	0.146489	0.305618	0.115207	0.526659	0.0170545	0.951945	3.97672e-06	0.00789673	0	0	0	0	0	0	0	0	1	0	1
6137	SGMS1	9.27136e-06	0.0662941	0.000989923	0.0347374	6.61155e-06	0.219925	0.717666	0.00262143	0.96425	0.116792	0.670772	0	1	0	1	0	0	0	0	0	0	2
35124	PET112	9.628e-06	0.988882	0.00482803	0.212469	0.0606679	9.10298e-05	0.262512	0.0113531	0.932542	0.32097	0.892289	0	0	0	0	1	0	0	0	0	0	1
10839	Ube4b	9.79479e-06	0.000643527	4.24012e-05	0.00109225	2.88791e-05	0.792665	0.662926	0.821452	0.796571	0.97884	0.601441	1	1	0	1	0	0	0	0	0	0	3
14955	AGBL3	9.82311e-06	0.000621519	0.00280204	0.0223629	1.04464e-06	0.642886	0.974393	0.355409	0.859636	0.0727441	0.825707	1	0	0	1	0	0	0	0	0	0	2
3263	H6pd	9.90423e-06	0.000816294	6.77267e-05	0.672679	0.000454661	0.813689	0.328743	0.895175	0.370023	0.627931	0.230483	1	1	0	1	0	0	0	0	0	0	3
44642	CCDC141	9.9494e-06	5.09723e-05	0.00410426	0.00395807	0.0820314	0.224212	0.961537	0.00585934	0.701265	0.199012	0.100847	1	0	0	0	0	0	0	0	0	0	1
22693	ARHGAP30	9.99772e-06	0.454241	0.00464967	0.317796	9.76253e-05	0.0235697	0.82991	0.00022393	0.865521	0.213149	0.337856	0	0	0	1	0	0	1	0	0	0	2
9125	TC289080	1.00823e-05	0.0115651	0.00121166	0.16757	2.2544e-06	0.750031	0.991615	0.0629681	0.915894	0.150968	0.355667	0	0	0	1	0	0	0	0	0	0	1
33355	CTH	1.03149e-05	0.905123	0.38083	0.872466	0.0202931	0.0520264	0.973818	0.00658285	0.590097	7.68793e-07	0.322725	0	0	0	0	0	0	0	0	1	0	1
26969	ANGPTL1	1.04096e-05	0.986636	0.761567	0.537907	0.000158095	0.62764	0.61879	1.63508e-05	0.816844	0.000152903	0.322214	0	0	0	1	0	0	1	0	1	0	3
24179	Sfrs5	1.08362e-05	0.558948	0.927893	0.90905	0.00352926	0.476865	0.681283	4.05309e-06	0.89277	0.000133227	0.193645	0	0	0	0	0	0	1	0	1	0	2
13445	BICC1	1.08495e-05	0.816566	0.364443	0.470753	0.00681809	0.0135369	0.307152	2.84742e-06	0.921002	0.0362785	0.623622	0	0	0	0	0	0	1	0	0	0	1
10604	TC242393	1.08905e-05	0.641739	0.000152745	0.0369202	0.0682241	0.000338499	0.199523	0.255062	0.979071	0.0255874	0.415009	0	1	0	0	1	0	0	0	0	0	2
6993	NOLA1	1.08905e-05	0.964379	0.0764421	0.410991	0.367035	0.0202837	0.537273	0.187134	0.983114	4.20252e-05	0.0586384	0	0	0	0	0	0	0	0	1	0	1
37941	LOC396781	1.09308e-05	0.458626	0.000339233	0.734521	0.000898012	0.00347614	0.992529	0.0114769	0.409699	0.797527	0.211252	0	1	0	1	0	0	0	0	0	0	2
16168	TC244242	1.0937e-05	0.000912396	0.00466275	0.00059013	5.7753e-05	0.495678	0.597566	0.747297	0.48416	0.215159	0.579999	1	0	1	1	0	0	0	0	0	0	3
38943	FASTKD1	1.0937e-05	0.000850357	0.00197946	0.00452536	7.91058e-06	0.749658	0.838481	0.557098	0.756412	0.229486	0.931912	1	0	0	1	0	0	0	0	0	0	2
39824	LOC396781	1.09643e-05	0.267116	0.000205864	0.664524	0.00027295	0.0116386	0.973136	0.017559	0.451871	0.927462	0.188911	0	1	0	1	0	0	0	0	0	0	2
26457	EHD1	1.10492e-05	0.00150534	4.24012e-05	0.0413763	2.45033e-06	0.647166	0.986318	0.317214	0.950993	0.673423	0.777132	0	1	0	1	0	0	0	0	0	0	2
18273	ATL2	1.10988e-05	0.905123	0.302736	0.914821	0.0110116	0.320648	0.992143	0.00100467	0.854125	1.13262e-06	0.0748056	0	0	0	0	0	0	0	0	1	0	1
10555	BNIP1	1.1155e-05	0.218184	0.920192	0.960183	9.38967e-05	0.142028	0.713346	0.0236887	0.991275	1.21286e-05	0.0317659	0	0	0	1	0	0	0	0	1	0	2
34838	TC261058	1.12821e-05	0.148333	0.699409	0.841267	0.000144915	0.179677	0.771334	0.0330518	0.991275	8.18889e-05	0.0602948	0	0	0	1	0	0	0	0	1	0	2
42334	RAD1	1.12821e-05	0.0219007	0.115352	3.20148e-05	0.0249676	0.432087	0.052712	0.766907	0.0329224	0.686603	0.00789673	0	0	1	0	0	0	0	0	0	0	1
2991	DNM2	1.13886e-05	4.5981e-05	0.439711	0.524149	0.00136051	0.000535851	0.301471	0.264083	0.919238	0.0196963	0.54134	1	0	0	0	1	0	0	0	0	0	2
37361	SLC16A8	1.1555e-05	6.76658e-06	0.000870072	0.321613	0.0179806	0.108167	0.242984	0.00521759	0.781971	0.327621	0.922667	1	1	0	0	0	0	0	0	0	0	2
43033	TSC22D3	1.17605e-05	0.945498	0.603727	0.948273	0.00249385	0.596477	0.944836	0.000262068	0.800138	2.62425e-06	0.138875	0	0	0	0	0	0	1	0	1	0	2
26221	LYN	1.18224e-05	0.621505	0.197249	0.722529	0.0429934	0.000314344	0.418889	1.60501e-05	0.916422	0.492536	0.619282	0	0	0	0	1	0	1	0	0	0	2
34525	FAM101B	1.19374e-05	0.809469	0.0497649	0.591254	0.000251546	0.0346111	0.845561	2.67842e-05	0.865521	0.0590688	0.187309	0	0	0	1	0	0	1	0	0	0	2
35366	FBXO3	1.19396e-05	0.583772	0.0279075	0.805103	0.854526	6.86036e-06	0.512811	0.508855	0.689071	0.000404871	0.627065	0	0	0	0	1	0	0	0	1	0	2
32305	GMPR2	1.20079e-05	0.947525	0.988407	0.967832	0.00300481	0.898952	0.957772	6.48329e-06	0.965515	1.49564e-05	0.0652276	0	0	0	0	0	0	1	0	1	0	2
23664	dmd	1.20248e-05	0.526663	0.253717	0.553025	0.0486919	0.00340943	0.944691	0.331577	0.252891	6.7273e-06	0.88897	0	0	0	0	0	0	0	0	1	0	1
41769	CCND2	1.20248e-05	0.988882	0.0644247	0.197306	0.00321948	0.0038452	0.236553	2.70153e-05	0.931204	0.23261	0.852663	0	0	0	0	0	0	1	0	0	0	1
36410	TC282690	1.22517e-05	0.817449	0.996981	0.925989	0.0014152	0.614786	0.835198	0.000553278	0.936886	1.83225e-05	0.0134628	0	0	0	0	0	0	1	0	1	0	2
5914	IGG2B	1.22562e-05	0.259252	0.000989923	0.812041	0.000102707	0.046012	0.893547	0.00897954	0.423411	0.673709	0.0683134	0	1	0	1	0	0	0	0	0	0	2
30040	U6	1.24355e-05	0.680492	0.764997	0.539682	0.0164917	0.858795	0.877875	7.85096e-05	0.814247	0.000149415	0.00621002	0	0	0	0	0	0	1	0	1	0	2
38129	HNRNPK	1.24772e-05	0.0310329	0.823285	0.684634	0.00215749	0.000858935	0.748292	0.759501	0.687883	2.0264e-05	0.415009	0	0	0	0	1	0	0	0	1	0	2
5926	CUL1	1.26301e-05	0.587906	0.108718	0.0252309	0.000148977	0.283467	0.166355	0.00016708	0.592919	0.0131427	0.979478	0	0	0	1	0	0	1	0	0	0	2
29257	TC283052	1.27832e-05	0.187545	0.26781	0.935196	0.19574	0.755482	0.37152	1.07451e-05	0.598296	6.72524e-05	0.620931	0	0	0	0	0	0	1	0	1	0	2
30894	THBS2	1.27909e-05	0.0645455	0.476599	0.953739	0.749993	3.84202e-06	0.212492	0.000296888	0.865974	0.529033	0.964588	0	0	0	0	1	0	1	0	0	0	2
3694	AGTPBP1	1.28123e-05	0.936412	0.491844	0.10808	0.111732	0.428896	0.186134	0.0215582	0.57551	0.0004027	0.000830481	0	0	0	0	0	0	0	0	1	1	2
2316	ACY1	1.28535e-05	0.0960503	2.18047e-05	0.10265	0.328627	0.0296485	0.831134	0.349658	0.82834	0.000159872	0.298977	0	1	0	0	0	0	0	0	1	0	2
11086	TC265655	1.2937e-05	0.993328	0.0887028	0.792995	0.000836955	0.0213749	0.859054	4.62623e-05	0.804675	0.13316	0.169807	0	0	0	1	0	0	1	0	0	0	2
10239	FBP	1.29972e-05	0.44512	0.753582	0.892467	0.0226471	0.0280507	0.903938	2.97548e-06	0.796571	0.0227013	0.0648412	0	0	0	0	0	0	1	0	0	0	1
21593	DUSP26	1.30161e-05	0.12351	0.966239	0.820382	0.000462756	0.0245401	0.766311	0.0992978	0.885103	1.21286e-05	0.109341	0	0	0	1	0	0	0	0	1	0	2
8732	VGLL2	1.3263e-05	0.200704	0.627124	0.746833	2.07902e-05	0.396105	0.92022	0.0084275	0.96425	4.62607e-05	0.0763939	0	0	0	1	0	0	0	0	1	0	2
44921	TC255003	1.3263e-05	0.0665045	0.0138666	0.553762	3.47623e-06	0.777752	0.913139	0.0121523	0.817105	0.0315896	0.0855485	0	0	0	1	0	0	0	0	0	0	1
18048	FOXO3	1.34122e-05	0.935264	0.106746	0.754298	0.140804	0.00680907	0.738939	0.0984176	0.840026	2.40791e-06	0.102816	0	0	0	0	0	0	0	0	1	0	1
13267	PPP2R5A	1.35419e-05	0.893471	0.930779	0.195409	0.000279493	0.915082	0.383509	0.00026632	0.484805	4.20252e-05	0.783228	0	0	0	1	0	0	1	0	1	0	3
16193	SPG20	1.35419e-05	0.00489635	9.35439e-05	0.00454706	4.16995e-05	0.52177	0.713346	0.444696	0.899323	0.944604	0.860275	0	1	0	1	0	0	0	0	0	0	2
43727	FAS	1.35419e-05	0.0606049	0.120937	0.0267981	0.739013	0.707901	0.686724	0.00074834	0.603902	0.00380729	0.00406489	0	0	0	0	0	0	1	0	0	0	1
35209	CD9	1.37332e-05	0.0134802	0.329862	0.292836	0.660695	0.0473523	0.914978	3.3516e-06	0.82834	0.0123506	0.0709838	0	0	0	0	0	0	1	0	0	0	1
12483	PPARGC-1	1.38102e-05	0.136221	0.507627	0.141555	6.20014e-05	0.22712	0.867129	0.00400418	0.603902	1.42917e-05	0.526977	0	0	0	1	0	0	0	0	1	0	2
35109	ARHGAP6	1.38102e-05	0.180791	0.434428	0.161878	0.386494	0.522483	0.00466147	0.00032145	0.0857001	0.0056886	0.40327	0	0	0	0	0	0	1	0	0	0	1
15059	TC240086	1.40106e-05	4.40559e-05	0.0832168	0.800454	0.000717574	0.00216036	0.0480079	0.365905	0.790856	0.0729337	0.113136	1	0	0	1	0	0	0	0	0	0	2
12793	Pgm2	1.40139e-05	6.41116e-06	0.000638478	0.0810887	6.4529e-05	0.122118	0.626012	0.501709	0.958109	0.532909	0.735236	1	1	0	1	0	0	0	0	0	0	3
34355	CYBB	1.40139e-05	0.782445	0.0640939	0.799423	4.05806e-05	0.118883	0.974393	8.35887e-05	0.796086	0.0340764	0.0685617	0	0	0	1	0	0	1	0	0	0	2
26736	ANAPC13	1.40139e-05	0.0859054	0.834572	0.0660358	0.000117128	0.0720614	0.762571	0.109266	0.287571	4.69703e-05	0.946277	0	0	0	1	0	0	0	0	1	0	2
42065	MBNL1	1.40139e-05	0.388498	0.969015	0.692319	0.0683368	0.124242	0.991615	7.56661e-06	0.796571	0.00605528	0.0358209	0	0	0	0	0	0	1	0	0	0	1
33442	AY609420	1.41789e-05	8.54585e-05	0.237747	0.0325397	0.000248821	0.00541315	0.974393	0.641528	0.541467	0.0188206	0.940016	1	0	0	1	0	0	0	0	0	0	2
23402	prcp	1.41891e-05	0.674498	0.598147	0.807083	0.0120245	0.0290229	0.567226	2.28423e-06	0.997999	0.0165753	0.327195	0	0	0	0	0	0	1	0	0	0	1
24043	LMF1	1.41997e-05	0.724175	0.38021	0.70719	2.39452e-05	0.686463	0.952679	0.000101418	0.994607	0.00058318	0.0986422	0	0	0	1	0	0	1	0	1	0	3
21126	EW429511	1.42244e-05	0.214956	4.73856e-05	0.0699095	7.02748e-05	0.0130894	0.622685	0.0199422	0.909765	0.866537	0.908242	0	1	0	1	0	0	0	0	0	0	2
7570	AJ656079	1.42244e-05	0.188779	0.957629	0.154362	0.00119891	0.0379226	0.822318	0.138688	0.287571	3.30447e-05	0.922392	0	0	0	0	0	0	0	0	1	0	1
1832	ACSL4	1.42806e-05	0.553232	0.000329827	0.591835	0.000144015	0.0048067	0.949806	0.00269601	0.57551	0.985157	0.267333	0	1	0	1	0	0	0	0	0	0	2
9562	TXLNB	1.42806e-05	0.0576874	0.22141	0.0031248	8.83418e-05	0.48359	0.343749	0.118202	0.237462	0.00664872	0.730187	0	0	0	1	0	0	0	0	0	0	1
20668	SLC13A4	1.42823e-05	0.000216352	3.49004e-06	0.0946024	0.0121239	0.618323	0.827749	0.114872	0.715253	0.0219445	0.928053	1	1	0	0	0	0	0	0	0	0	2
42078	RPL9	1.44581e-05	0.769025	0.000366485	0.264198	0.354084	0.000166415	0.567306	0.682062	0.778703	0.00156653	0.586619	0	1	0	0	1	0	0	0	0	0	2
44320	CPSF3	1.44581e-05	0.0593253	8.63294e-05	0.445853	0.671719	0.114115	0.95956	0.0556181	0.603902	3.38016e-05	0.566826	0	1	0	0	0	0	0	0	1	0	2
7942	TC261870	1.4465e-05	0.129673	3.30562e-05	0.0544532	0.000802362	0.0125752	0.680276	0.137554	0.898715	0.418862	0.974481	0	1	0	1	0	0	0	0	0	0	2
8033	MARCKS	1.45729e-05	0.16714	0.265023	0.1807	2.00827e-05	0.719239	0.886023	0.00204754	0.790856	0.000195255	0.40417	0	0	0	1	0	0	0	0	1	0	2
18320	TC282742	1.47315e-05	0.402176	0.980486	0.778347	0.0246209	0.13265	0.340909	1.2191e-06	0.817105	0.00140187	0.493482	0	0	0	0	0	0	1	0	0	0	1
7999	CTBP2	1.48491e-05	0.455469	0.712456	0.612406	0.000132769	0.584741	0.987596	0.000934481	0.867747	2.65568e-05	0.153624	0	0	0	1	0	0	1	0	1	0	3
613	HRH1	1.50945e-05	0.0656168	0.887563	0.93709	0.262362	0.000747173	0.20164	2.7079e-06	0.990859	0.241999	0.705202	0	0	0	0	1	0	1	0	0	0	2
21239	POLR2G	1.5106e-05	1.16541e-05	0.000610074	0.00948389	8.04472e-05	0.325908	0.990943	0.505284	0.861207	0.806113	0.857329	1	1	0	1	0	0	0	0	0	0	3
4645	IGFBP2	1.52102e-05	0.971932	0.241681	0.356401	0.000729817	0.0997339	0.45519	2.70444e-05	0.910587	0.0206466	0.559337	0	0	0	1	0	0	1	0	0	0	2
19115	UCHL1	1.52279e-05	0.110929	0.111692	0.154201	0.269207	0.933766	0.884751	0.000124885	0.843881	9.48359e-05	0.00716206	0	0	0	0	0	0	1	0	1	0	2
23620	G3BP1	1.52498e-05	0.0168848	0.0250117	0.455079	5.54306e-06	0.815201	0.83925	0.0658379	0.900111	0.0179305	0.126172	0	0	0	1	0	0	0	0	0	0	1
19246	COIL	1.5324e-05	0.121889	0.16546	0.402581	1.33606e-05	0.815813	0.994336	0.00523305	0.969804	0.000971833	0.175368	0	0	0	1	0	0	0	0	1	0	2
22143	SAMD4A	1.57579e-05	0.0293673	0.61906	0.602393	0.000169599	0.00793643	0.728548	0.102851	0.894946	1.04616e-05	0.123851	0	0	0	1	0	0	0	0	1	0	2
32397	PBD-2	1.59597e-05	0.0835968	0.000471146	0.566965	5.79761e-05	0.154649	0.919742	0.0534628	0.57551	0.742895	0.184979	0	1	0	1	0	0	0	0	0	0	2
27926	DDX46	1.59654e-05	0.556917	0.605778	0.341199	2.99419e-05	0.909662	0.782441	0.00056405	0.764023	9.3714e-05	0.395239	0	0	0	1	0	0	1	0	1	0	3
31743	TTC32	1.6193e-05	0.91665	0.0687033	0.59759	0.284932	0.0269722	0.558126	0.0682222	0.118822	9.19095e-06	0.959979	0	0	0	0	0	0	0	0	1	0	1
23241	LOC396781	1.62692e-05	0.273673	0.000497322	0.801677	0.000275372	0.0246732	0.909715	0.018325	0.374626	0.966977	0.106117	0	1	0	1	0	0	0	0	0	0	2
27139	DR082251	1.62885e-05	0.925627	0.916453	0.409778	0.00107141	0.699759	0.399628	4.11345e-05	0.659575	0.00023683	0.619282	0	0	0	0	0	0	1	0	1	0	2
15815	RNF10	1.64119e-05	0.00640714	0.847031	0.0353908	0.00589799	0.00187565	0.930161	0.801868	0.200085	0.00379622	0.723068	0	0	0	0	0	0	0	0	0	0	0
20235	CD163	1.64161e-05	0.754188	0.97377	0.903361	0.00143655	0.644166	0.790276	1.10277e-05	0.914512	9.13391e-05	0.14944	0	0	0	0	0	0	1	0	1	0	2
22110	TFDP2	1.64161e-05	0.000694976	0.910717	0.564934	0.281436	8.1559e-06	0.465758	0.00579659	0.655312	0.0960021	0.918329	1	0	0	0	1	0	0	0	0	0	2
26829	TTC28	1.64161e-05	0.887702	0.985539	0.244812	0.00131899	0.75778	0.195618	4.26171e-05	0.498245	0.000146712	0.850433	0	0	0	0	0	0	1	0	1	0	2
20198	ANXA8	1.64666e-05	0.00800917	0.792202	0.801811	0.997476	0.000233511	0.343938	2.68695e-05	0.943159	0.598375	0.738759	0	0	0	0	1	0	1	0	0	0	2
17404	AKAP9	1.72091e-05	0.283552	0.525277	0.0077516	0.280384	0.663346	0.194176	0.00154194	0.18363	0.0085352	9.64946e-05	0	0	0	0	0	0	0	0	0	1	1
30244	TC281586	1.77154e-05	0.746503	0.741859	0.693384	0.000326957	0.956033	0.938751	0.0006236	0.904661	0.000228105	0.201387	0	0	0	1	0	0	1	0	1	0	3
17103	TC244795	1.78245e-05	0.798262	0.903369	0.646807	0.00746745	0.351	0.473422	8.82804e-06	0.806567	0.000889498	0.481543	0	0	0	0	0	0	1	0	1	0	2
1953	TTC4	1.79503e-05	7.95047e-05	2.49615e-05	0.115482	4.27257e-05	0.980867	0.825758	0.900648	0.817105	0.853587	0.765699	1	1	0	1	0	0	0	0	0	0	3
29275	prcp	1.79503e-05	0.744751	0.518142	0.840633	0.00894165	0.0300814	0.679979	3.76175e-06	0.962073	0.0220647	0.254042	0	0	0	0	0	0	1	0	0	0	1
25301	COL14A1	1.81025e-05	0.757207	0.874234	0.889852	0.0120035	0.789542	0.993667	3.28129e-05	0.969804	0.000135926	0.0440108	0	0	0	0	0	0	1	0	1	0	2
20094	ZNF839	1.83286e-05	0.910209	0.00121166	0.998853	0.981894	0.000718286	0.973136	0.851622	0.21019	4.23879e-05	0.990837	0	0	0	0	1	0	0	0	1	0	2
24786	Phkb	1.83398e-05	0.000277369	0.470762	0.484884	0.0567755	2.54986e-05	0.331151	0.0195825	0.890308	0.188063	0.894442	1	0	0	0	1	0	0	0	0	0	2
41701	PCYOX1	1.866e-05	0.226199	0.976699	0.807178	0.0865821	0.0361904	0.86721	5.11862e-06	0.840026	0.0242236	0.0944141	0	0	0	0	0	0	1	0	0	0	1
1005	KCTD9	1.87442e-05	0.00193754	6.66993e-06	0.00735274	0.00134084	0.350719	0.831725	0.843783	0.995799	0.148	0.573842	0	1	0	0	0	0	0	0	0	0	1
40587	PCYOX1	1.88038e-05	0.583772	0.00248194	0.436199	0.92474	0.0058748	0.855167	0.204338	0.761201	1.24747e-05	0.272271	0	0	0	0	0	0	0	0	1	0	1
24496	DOK7	1.88038e-05	0.89469	0.329354	0.885839	0.0427196	0.0393093	0.83925	0.0279192	0.865521	3.65052e-06	0.0900414	0	0	0	0	0	0	0	0	1	0	1
11009	UBAC2	1.89103e-05	0.92908	0.238213	0.99789	0.0429062	0.0271852	0.978174	0.0163452	0.704588	8.04932e-07	0.211085	0	0	0	0	0	0	0	0	1	0	1
29163	CRY	1.895e-05	0.0724728	0.241275	0.465551	0.441833	1.87492e-05	0.0233291	0.000238116	0.955668	0.558994	0.735238	0	0	0	0	1	0	1	0	0	0	2
19941	NDUFA4	1.895e-05	0.622806	0.731004	0.971356	0.00387905	0.0901888	0.799322	0.017559	0.937645	5.31655e-06	0.0518089	0	0	0	0	0	0	0	0	1	0	1
11076	SLA-DQA1	1.895e-05	0.173646	0.0876957	0.103243	1.85788e-05	0.899452	0.765713	0.00235028	0.817105	0.00390168	0.583478	0	0	0	1	0	0	0	0	0	0	1
5896	BRIX1	1.895e-05	0.643658	0.104257	0.00729675	0.293007	0.00105376	0.000933383	0.0170233	0.484551	0.452544	0.0508015	0	0	0	0	0	1	0	0	0	0	1
15999	EW319552	1.89651e-05	0.882257	0.863894	0.917419	0.00249387	0.505734	0.872364	0.00217544	0.988024	2.39189e-05	0.0285984	0	0	0	0	0	0	0	0	1	0	1
9384	PPM1L	1.90983e-05	0.395906	0.963724	0.823377	0.045576	0.0661047	0.930905	1.96826e-06	0.840026	0.00575211	0.0563732	0	0	0	0	0	0	1	0	0	0	1
22306	TC288417	1.92009e-05	0.0698875	2.81667e-05	0.0886804	0.000140645	0.0164096	0.872041	0.0426498	0.812191	0.879633	0.760786	0	1	0	1	0	0	0	0	0	0	2
1687	CASP13	1.92009e-05	0.178023	0.0698345	0.758382	0.814051	2.422e-06	0.187757	0.0127163	0.81237	0.0359987	0.820848	0	0	0	0	1	0	0	0	0	0	1
30717	BX669608	1.92171e-05	0.245877	0.308118	0.738265	0.000136315	0.846318	0.93368	0.0115463	0.955542	0.00286131	0.107522	0	0	0	1	0	0	0	0	0	0	1
24909	PTPN21	1.92171e-05	0.119433	0.0165208	0.49426	2.31628e-06	0.638779	0.98387	0.00456189	0.865521	0.0248112	0.114631	0	0	0	1	0	0	0	0	0	0	1
12347	EH008384	1.92171e-05	0.622806	0.025609	0.88116	0.630986	5.60615e-06	0.661827	0.0632879	0.58293	0.0227184	0.984483	0	0	0	0	1	0	0	0	0	0	1
37664	MFF	1.93029e-05	0.0737914	4.351e-05	0.491119	0.361508	0.0572937	0.953969	0.241183	0.533828	0.000228324	0.818547	0	1	0	0	0	0	0	0	1	0	2
21753	C19orf42	1.94263e-05	0.0033032	0.558815	0.397158	0.00112997	0.00505286	0.729699	0.973003	0.812191	0.00392806	0.588992	0	0	0	0	0	0	0	0	0	0	0
39506	EXOC4	1.94686e-05	0.986893	0.520334	0.880199	0.00492921	0.341325	0.922095	0.00182581	0.948742	3.25618e-06	0.0386734	0	0	0	0	0	0	0	0	1	0	1
39781	PSMB4	1.96914e-05	0.000274299	0.00684724	0.00735274	8.03322e-06	0.350715	0.933784	0.771156	0.715253	0.110056	0.96032	1	0	0	1	0	0	0	0	0	0	2
28547	AK238379	1.9953e-05	0.0653889	0.393209	0.862495	5.58453e-05	0.180675	0.569736	0.0260661	0.909765	0.000102432	0.0213545	0	0	0	1	0	0	0	0	1	0	2
43154	NCOR2	2.00312e-05	0.273339	0.225383	0.893058	0.0564011	0.000512148	0.453673	0.751774	0.835393	1.01103e-05	0.154524	0	0	0	0	1	0	0	0	1	0	2
8472	ZC3H3	2.00312e-05	0.57921	0.0364025	0.734753	0.350604	0.000202167	0.992143	0.948741	0.181303	2.0264e-05	0.991896	0	0	0	0	1	0	0	0	1	0	2
10855	BX917247	2.00312e-05	0.46543	0.00250815	0.0592723	0.00106566	0.0113973	0.383509	0.00496449	0.968933	0.811408	0.990225	0	0	0	0	0	0	0	0	0	0	0
9171	JMJD6	2.02461e-05	0.000643527	0.0543867	0.14853	8.08357e-06	0.129076	0.885845	0.613348	0.899437	0.0122087	0.533674	1	0	0	1	0	0	0	0	0	0	2
25194	BMP4	2.065e-05	0.689865	0.780592	0.500753	0.000966185	0.208626	0.84139	0.00619751	0.538005	3.85691e-06	0.532908	0	0	0	1	0	0	0	0	1	0	2
23817	C19orf42	2.07322e-05	0.00151504	0.661531	0.226143	0.000313142	0.00306268	0.864368	0.994316	0.655312	0.000866603	0.74466	0	0	0	1	0	0	0	0	1	0	2
22763	AK238885	2.07322e-05	0.199281	0.911474	0.949122	0.105948	0.0695725	0.412472	4.17516e-06	0.909765	0.00946241	0.485486	0	0	0	0	0	0	1	0	0	0	1
27645	AJ956332	2.11228e-05	0.057704	0.470632	0.347053	0.380814	0.000117475	0.00755924	8.03579e-05	0.811134	0.976411	0.639919	0	0	0	0	1	0	1	0	0	0	2
19528	UNC50	2.1217e-05	0.046119	0.916706	0.455079	0.522575	0.000813755	0.914978	3.41888e-05	0.558627	0.550902	0.113855	0	0	0	0	1	0	1	0	0	0	2
24260	KLF9	2.12367e-05	0.141724	0.593404	0.915752	7.85739e-05	0.323191	0.36121	0.0428335	0.778032	0.000317616	0.00515221	0	0	0	1	0	0	0	0	1	0	2
41021	CYP51	2.12466e-05	0.0158167	0.00296715	0.317116	5.97245e-06	0.842251	0.919433	0.0428083	0.84781	0.0801717	0.181696	0	0	0	1	0	0	0	0	0	0	1
16496	FMO1	2.14734e-05	0.226979	0.00268589	0.301007	5.93843e-06	0.149106	0.917085	0.00229915	0.883512	0.181337	0.313153	0	0	0	1	0	0	0	0	0	0	1
5301	ZAK	2.16435e-05	0.320662	0.763994	0.724802	0.0669939	0.0146785	0.964337	1.26484e-05	0.659575	0.0889087	0.0513842	0	0	0	0	0	0	1	0	0	0	1
13765	EEA1	2.17242e-05	0.0802991	0.811336	0.821242	0.175535	0.000417807	0.117182	0.51675	0.951403	0.0101038	0.171694	0	0	0	0	1	0	0	0	0	0	1
21035	COL4A1	2.20583e-05	0.817673	0.764477	0.977552	0.00561944	0.177504	0.957772	0.00158982	0.883512	2.21346e-06	0.0817246	0	0	0	0	0	0	0	0	1	0	1
7496	PLEKHO2	2.21102e-05	0.110929	0.759004	0.973619	0.335627	0.000278815	0.465884	1.30027e-05	0.869559	0.501807	0.527938	0	0	0	0	1	0	1	0	0	0	2
37841	SRPK3	2.21102e-05	0.512505	0.0807914	0.919655	0.107706	0.390088	0.677197	0.00123207	0.484805	3.12064e-06	0.60103	0	0	0	0	0	0	0	0	1	0	1
26571	APH1A	2.21102e-05	0.786786	0.881572	0.70991	0.00297325	0.382448	0.569736	1.63665e-05	0.859636	0.00105625	0.376417	0	0	0	0	0	0	1	0	0	0	1
28593	RAB3A	2.22275e-05	0.287005	0.889333	0.588065	0.00024578	0.217729	0.99729	0.0221438	0.796571	4.20252e-05	0.28176	0	0	0	1	0	0	0	0	1	0	2
34669	SLC25A27	2.23624e-05	0.622204	0.94258	0.938819	0.00132671	0.261224	0.936958	0.00543446	0.91978	1.31662e-05	0.0817246	0	0	0	0	0	0	0	0	1	0	1
12095	KRT10	2.25319e-05	0.000912396	3.81381e-05	0.0136793	0.000327774	0.711053	0.941692	0.948002	0.991221	0.576661	0.836398	1	1	0	1	0	0	0	0	0	0	3
17057	BW961514	2.28883e-05	0.483445	0.282703	0.971752	0.00994048	0.00347614	0.723902	6.96542e-06	0.790856	0.20206	0.183502	0	0	0	0	0	0	1	0	0	0	1
4124	DNMT3A	2.29169e-05	0.431729	0.0346647	0.0930217	4.08419e-05	0.271583	0.511491	0.00127671	0.866356	0.0597006	0.778213	0	0	0	1	0	0	0	0	0	0	1
4070	BACH1	2.30917e-05	0.00842397	0.990508	0.979357	0.085841	5.57218e-05	0.0912579	0.205131	0.979444	0.0172013	0.259904	0	0	0	0	1	0	0	0	0	0	1
21213	CLIC2	2.32204e-05	0.186689	0.827236	0.897439	0.175337	0.00192922	0.297696	3.83617e-06	0.987715	0.153094	0.652792	0	0	0	0	0	0	1	0	0	0	1
7625	NUDT2	2.33471e-05	0.0593253	0.595009	0.941659	0.760563	2.85236e-06	0.174265	0.0124399	0.91964	0.105233	0.770851	0	0	0	0	1	0	0	0	0	0	1
11897	S100A11	2.35774e-05	0.972716	0.00553161	0.776318	0.0724127	6.37672e-05	0.852191	0.0123345	0.558627	0.314286	0.65004	0	0	0	0	1	0	0	0	0	0	1
2669	SAPS3	2.37784e-05	0.33996	0.913039	0.548246	0.000103712	0.262147	0.986759	0.00990536	0.764783	1.50106e-05	0.277605	0	0	0	1	0	0	0	0	1	0	2
19885	ccdc53	2.37859e-05	0.347689	0.0687033	0.0759871	0.557564	7.10652e-05	0.00494837	0.0175297	0.795032	0.123067	0.13749	0	0	0	0	1	0	0	0	0	0	1
35961	TC288016	2.38814e-05	5.58399e-05	0.0110111	0.00454706	0.00126036	0.0520264	0.990966	0.299604	0.64029	0.530329	0.632888	1	0	0	0	0	0	0	0	0	0	1
12367	MEF2A	2.4436e-05	0.935434	0.269147	0.943513	0.000313142	0.17099	0.993667	2.20638e-05	0.797341	0.00763364	0.0374373	0	0	0	1	0	0	1	0	0	0	2
33170	JAK3	2.44925e-05	0.65424	0.0137347	0.598107	0.000286015	0.0283156	0.92437	0.000394465	0.781971	0.26261	0.21393	0	0	0	1	0	0	1	0	0	0	2
8978	TCF4	2.45102e-05	0.989188	0.70214	0.771489	0.00357421	0.557224	0.830702	0.00116903	0.953389	1.15507e-05	0.0125658	0	0	0	0	0	0	0	0	1	0	1
37746	RPP25L	2.45388e-05	0.000304772	0.0648817	0.03536	4.48331e-05	0.0344399	0.975928	0.900412	0.715253	0.0150362	0.890571	1	0	0	1	0	0	0	0	0	0	2
29506	NHLRC2	2.46225e-05	0.0025218	0.111133	0.792995	5.84309e-05	0.112875	0.298709	0.61388	0.822348	0.0127821	0.0599423	0	0	0	1	0	0	0	0	0	0	1
6992	VAV2	2.47492e-05	3.71428e-05	0.0677487	0.095352	0.0657074	0.00439676	0.725492	0.00329015	0.827544	0.943685	0.65952	1	0	0	0	0	0	0	0	0	0	1
20433	CERCAM	2.50254e-05	0.671098	0.523344	0.75091	0.00990102	0.0235034	0.495448	3.80758e-06	0.991275	0.030008	0.395239	0	0	0	0	0	0	1	0	0	0	1
9336	AS3MT	2.52499e-05	0.391268	0.374657	0.701852	0.0262813	0.00504632	0.302691	0.382881	0.994731	1.24675e-05	0.0307024	0	0	0	0	0	0	0	0	1	0	1
3634	MCM4	2.54529e-05	0.785787	0.0379817	0.825643	7.32776e-05	0.0731225	0.987212	0.000178213	0.731429	0.0936142	0.0744083	0	0	0	1	0	0	1	0	0	0	2
44044	AK236120	2.55494e-05	0.605576	0.000136088	0.0735506	0.00230521	0.00144552	0.331151	0.0234126	0.939877	0.389247	0.907629	0	1	0	0	0	0	0	0	0	0	1
40379	AK239441	2.55513e-05	0.00490586	0.875784	0.931461	0.687975	8.67408e-05	0.238194	1.54132e-05	0.889632	0.871301	0.733974	0	0	0	0	1	0	1	0	0	0	2
4169	Rab3gap1	2.55568e-05	0.61668	0.218419	0.0369202	0.73486	0.00292081	0.0053262	0.722849	0.565092	0.011118	0.00525201	0	0	0	0	0	0	0	0	0	0	0
12429	ZMIZ1	2.57596e-05	0.9569	0.596907	0.988736	0.0125397	0.277685	0.984737	0.0020049	0.865521	5.31655e-06	0.10369	0	0	0	0	0	0	0	0	1	0	1
11667	ALDH3A2	2.58929e-05	0.0772179	0.718901	0.635537	5.5e-05	0.10998	0.887763	0.0788602	0.883512	6.20672e-05	0.174335	0	0	0	1	0	0	0	0	1	0	2
7019	GPD1L	2.59359e-05	0.341422	0.693513	0.546122	0.000111301	0.503987	0.991158	0.00581884	0.84781	9.77027e-05	0.239224	0	0	0	1	0	0	0	0	1	0	2
20206	GTF2IRD2	2.59506e-05	0.94103	0.691032	0.657438	0.02219	0.655359	0.796773	0.000778648	0.906142	3.73812e-05	0.0114054	0	0	0	0	0	0	1	0	1	0	2
11394	C8orf76	2.63429e-05	0.859833	0.0379131	0.903346	0.00673633	0.00087026	0.83925	9.20181e-05	0.635971	0.712488	0.215729	0	0	0	0	1	0	1	0	0	0	2
17614	LPIN1	2.64677e-05	0.871749	0.02205	0.0559008	0.000196215	0.0266865	0.139754	0.000238032	0.830618	0.255481	0.990225	0	0	0	1	0	0	1	0	0	0	2
9853	TC294581	2.65714e-05	0.00795674	0.67052	0.825666	0.876247	0.00636087	0.0299355	5.04401e-05	0.719666	0.290761	0.864307	0	0	0	0	0	0	1	0	0	0	1
33911	TC292435	2.72438e-05	0.92908	0.973723	0.771489	0.0012299	0.816685	0.897169	0.000576667	0.817105	4.95452e-05	0.247595	0	0	0	0	0	0	1	0	1	0	2
5323	MCPH1	2.72874e-05	0.135059	0.675102	0.180828	0.176552	0.00378073	0.89116	6.40876e-05	0.181303	0.443818	0.00552962	0	0	0	0	0	0	1	0	0	0	1
39566	IGFBP1	2.75258e-05	0.649564	0.965459	0.945596	0.00127211	0.328979	0.94106	0.00432823	0.936736	1.89333e-05	0.0775502	0	0	0	0	0	0	0	0	1	0	1
21246	DIAPH1	2.76208e-05	0.00746183	0.832265	0.906399	0.600992	9.77008e-05	0.30618	1.38588e-05	0.850473	0.837142	0.634747	0	0	0	0	1	0	1	0	0	0	2
4073	NLRC5	2.7672e-05	0.236818	0.000314809	0.699782	0.147919	0.0374096	0.200934	0.96403	0.0270657	0.013973	0.107522	0	1	0	0	0	0	0	0	0	0	1
31343	BRP44	2.77075e-05	0.896263	0.437513	0.867234	0.000669702	0.422936	0.974393	7.47933e-05	0.922091	0.00309809	0.0841312	0	0	0	1	0	0	1	0	0	0	2
37919	FCER1G	2.78892e-05	0.929806	0.497981	0.868923	0.00286003	0.178857	0.961537	8.12827e-05	0.675479	0.0179123	0.0186822	0	0	0	0	0	0	1	0	0	0	1
23099	NANOS1	2.79929e-05	0.00240268	0.20997	0.22397	0.977518	0.0394345	0.85431	1.79602e-05	0.849583	0.0463019	0.134559	0	0	0	0	0	0	1	0	0	0	1
19583	HSPD1	2.84882e-05	0.488434	0.650881	0.965474	9.38967e-05	0.788349	0.719128	0.00296542	0.834474	0.000241687	0.00946294	0	0	0	1	0	0	0	0	1	0	2
36133	TRIM32	2.87977e-05	0.128605	0.834572	0.0592723	0.0714298	0.00127464	0.700622	0.999889	0.0857001	0.00152492	0.535925	0	0	0	0	0	0	0	0	0	0	0
29125	NUDCD2	2.90002e-05	0.0718409	0.792514	0.120925	0.000118683	0.0737362	0.893649	0.133781	0.48416	7.99023e-05	0.831063	0	0	0	1	0	0	0	0	1	0	2
24318	MEF2C	2.90247e-05	0.738758	0.503601	0.580299	0.00102916	0.0814489	0.41181	5.52286e-06	0.922738	0.00987275	0.450646	0	0	0	0	0	0	1	0	0	0	1
15706	TC258285	2.91825e-05	0.605576	0.000840287	0.711037	0.00128328	0.0035524	0.98387	0.00759762	0.518816	0.856164	0.278332	0	1	0	0	0	0	0	0	0	0	1
42965	AK233731	2.94956e-05	0.782358	0.416936	0.782482	0.0100639	0.0205463	0.628265	8.49866e-06	0.967641	0.0500031	0.344078	0	0	0	0	0	0	1	0	0	0	1
1259	AAK1	2.95561e-05	0.489872	0.234276	0.609458	1.58883e-05	0.763793	0.972705	0.000525346	0.989583	0.00166197	0.12858	0	0	0	1	0	0	1	0	0	0	2
20779	RASGEF1B	2.95561e-05	0.746139	0.595009	0.965474	0.0152991	0.0588052	0.838928	0.0195154	0.901869	5.00648e-06	0.0810307	0	0	0	0	0	0	0	0	1	0	1
3252	FAM129A	2.95578e-05	0.239641	0.963335	0.96871	0.0616584	0.0383021	0.681283	3.59512e-06	0.953389	0.0183268	0.211827	0	0	0	0	0	0	1	0	0	0	1
11908	ERBB2	2.96534e-05	0.00506032	0.84284	0.969119	0.014259	0.000254743	0.127655	0.568523	0.975786	0.00525339	0.166846	0	0	0	0	1	0	0	0	0	0	1
27425	ADCK5	2.96592e-05	0.949632	0.202169	0.811497	0.0316123	0.0634173	0.829456	0.0259766	0.885726	2.18528e-06	0.0669529	0	0	0	0	0	0	0	0	1	0	1
28903	MYST4	2.96592e-05	0.94103	0.367368	0.742287	0.0012484	0.0951676	0.738983	1.45469e-05	0.974389	0.0142947	0.226091	0	0	0	0	0	0	1	0	0	0	1
24715	ARPC1B	2.96592e-05	0.742617	0.43456	0.919661	0.00880429	0.0217289	0.784381	7.44264e-06	0.883512	0.046973	0.181566	0	0	0	0	0	0	1	0	0	0	1
16370	PANX2	2.99534e-05	0.744297	0.0122084	0.195522	0.000782812	0.00795411	0.476405	0.000230184	0.985857	0.377244	0.724571	0	0	0	1	0	0	1	0	0	0	2
37521	ITGB3	3.03854e-05	0.450094	0.528309	0.973298	0.0416124	0.00680907	0.689699	1.42212e-05	0.865521	0.156292	0.278051	0	0	0	0	0	0	1	0	0	0	1
20969	B4GALT3	3.06092e-05	0.159589	0.364563	0.840573	5.461e-05	0.560212	0.775582	0.00983613	0.916422	0.000393274	0.0337495	0	0	0	1	0	0	0	0	1	0	2
8912	BIVM	3.06092e-05	0.00520648	0.921989	0.943513	0.781089	3.95845e-05	0.145804	0.000255426	0.984416	0.869311	0.98471	0	0	0	0	1	0	1	0	0	0	2
19133	SYNGR1	3.06092e-05	0.215798	0.0301784	0.820382	0.468901	0.536315	0.86343	0.0023179	0.708178	3.21634e-05	0.408305	0	0	0	0	0	0	0	0	1	0	1
41023	ZBTB16	3.09807e-05	0.388498	0.903241	0.755271	0.025597	0.299187	0.974393	1.30027e-05	0.878733	0.00159276	0.0368351	0	0	0	0	0	0	1	0	0	0	1
24566	FAM129A	3.112e-05	0.912744	0.290277	0.958095	0.00492994	0.034549	0.997126	3.01535e-05	0.655312	0.0660247	0.0397368	0	0	0	0	0	0	1	0	0	0	1
13262	LMTK2	3.19159e-05	0.136501	0.0491111	0.059268	4.19732e-05	0.828481	0.68064	0.0184899	0.796571	0.0370128	0.860324	0	0	0	1	0	0	0	0	0	0	1
41602	B4GALT3	3.20915e-05	0.12533	0.390516	0.765711	4.4337e-05	0.476865	0.834499	0.0228355	0.972255	0.000548463	0.0696602	0	0	0	1	0	0	0	0	1	0	2
11332	SERGEF	3.22432e-05	9.78943e-06	0.0708493	0.604029	0.012997	0.00743296	0.145804	0.0203231	0.910016	0.737847	0.711179	1	0	0	0	0	0	0	0	0	0	1
13953	PALLD	3.23448e-05	0.299211	0.507774	0.6138	0.000113534	0.57689	0.991615	0.000967319	0.939877	3.99594e-05	0.110599	0	0	0	1	0	0	1	0	1	0	3
14711	UNC50	3.25658e-05	0.0370386	0.943765	0.321613	0.29838	0.00340814	0.984515	1.38588e-05	0.499488	0.273573	0.031318	0	0	0	0	0	0	1	0	0	0	1
40360	RIPK2	3.26953e-05	0.0388003	0.723496	0.986414	0.103584	2.48257e-05	0.220431	0.483907	0.915169	0.00152492	0.308282	0	0	0	0	1	0	0	0	0	0	1
37968	GMPR2	3.2697e-05	0.928374	0.964665	0.8688	0.00172693	0.924193	0.86087	8.44615e-05	0.883512	7.9222e-05	0.181026	0	0	0	0	0	0	1	0	1	0	2
38492	AJ961017	3.31271e-05	0.725817	0.611127	0.993368	0.000587333	0.942698	0.901117	0.000174335	0.863791	0.000241687	0.0191589	0	0	0	1	0	0	1	0	1	0	3
15469	MAP1B	3.32301e-05	0.361492	0.258317	0.588501	0.1827	0.949487	0.994336	0.00022393	0.996487	8.96138e-05	0.0600054	0	0	0	0	0	0	1	0	1	0	2
32193	BW962091	3.32312e-05	0.00600487	0.213653	0.154362	4.4337e-05	0.0622215	0.961537	0.312798	0.792126	0.00118863	0.539774	0	0	0	1	0	0	0	0	0	0	1
28251	EXOC8	3.3247e-05	0.616788	0.113328	0.991455	0.601552	2.80471e-05	0.84852	0.881881	0.558627	0.000311659	0.815237	0	0	0	0	1	0	0	0	1	0	2
27245	TEX2	3.34771e-05	0.0778607	0.0905102	0.248041	1.02161e-05	0.823003	0.992143	0.0035659	0.939877	0.0008519	0.232121	0	0	0	1	0	0	0	0	1	0	2
25784	BTC	3.34771e-05	0.416179	0.426475	0.755381	0.0524469	0.00118538	0.974056	0.386148	0.518816	1.14056e-05	0.634451	0	0	0	0	0	0	0	0	1	0	1
8275	ZBTB4	3.35358e-05	0.578096	0.905824	0.690025	0.00077145	0.476918	0.984001	0.00343214	0.829384	5.39717e-05	0.231177	0	0	0	1	0	0	0	0	1	0	2
33092	C5orf23	3.36222e-05	0.218053	0.0173743	0.106692	2.52789e-05	0.397291	0.717674	0.0048701	0.932419	0.0794186	0.677146	0	0	0	1	0	0	0	0	0	0	1
42955	OXCT1	3.36519e-05	0.0011149	0.54529	0.991175	0.0795605	6.01496e-05	0.0315741	0.0372826	0.840026	0.179885	0.28179	0	0	0	0	1	0	0	0	0	0	1
14176	NDUFA4	3.36574e-05	0.217103	0.937458	0.656002	0.000503627	0.0759565	0.957772	0.0389051	0.797341	1.8291e-05	0.226275	0	0	0	1	0	0	0	0	1	0	2
41002	TC299102	3.38799e-05	0.583268	0.818416	0.925989	0.0108402	0.107089	0.700622	5.30101e-06	0.992247	0.00630526	0.212609	0	0	0	0	0	0	1	0	0	0	1
15142	FTL	3.41047e-05	0.691726	0.259708	0.00450701	0.000496845	0.547345	0.035564	0.00283671	0.252891	0.0266811	0.599596	0	0	0	1	0	0	0	0	0	0	1
32857	MYH1	3.41087e-05	0.399991	0.000107784	0.162936	0.000394905	0.00574889	0.68342	0.0195524	0.82834	0.6886	0.85572	0	1	0	1	0	0	0	0	0	0	2
12553	DIS3	3.41679e-05	0.138736	0.818275	0.214047	0.020684	0.0729465	0.00494837	0.67464	0.243112	0.0118014	0.000398866	0	0	0	0	0	0	0	0	0	1	1
12448	FBXL2	3.46758e-05	0.132979	0.074748	0.773033	7.10355e-06	0.937521	0.851077	0.00848818	0.821797	0.00792723	0.0455841	0	0	0	1	0	0	0	0	0	0	1
39978	DCHS1	3.52332e-05	0.989334	0.121639	0.40229	0.00277458	0.0134884	0.465758	2.37408e-05	0.989583	0.10778	0.586825	0	0	0	0	0	0	1	0	0	0	1
36103	MARVELD1	3.52809e-05	0.0316554	0.000284551	0.105954	1.22179e-05	0.304266	0.941259	0.0803262	0.920051	0.604621	0.665965	0	1	0	1	0	0	0	0	0	0	2
25137	DST	3.57378e-05	0.750708	0.590385	0.65413	0.00110188	0.125632	0.48484	6.99424e-06	0.931204	0.00578489	0.382261	0	0	0	0	0	0	1	0	0	0	1
24964	CCDC141	3.60908e-05	0.196717	0.0132614	0.0267373	0.793201	0.409234	0.448997	0.0188632	0.796571	0.000175813	0.00511231	0	0	0	0	0	0	0	0	1	0	1
27640	CPSF6	3.75371e-05	0.746787	0.833082	0.99579	0.000227499	0.863989	0.914515	0.000933813	0.93864	0.000109045	0.0253648	0	0	0	1	0	0	1	0	1	0	3
33469	PAAF1	3.76053e-05	0.106988	0.476515	0.129837	0.316645	0.310157	0.87641	6.9416e-05	0.635971	0.00573302	0.00590042	0	0	0	0	0	0	1	0	0	0	1
15845	BI339314	3.77076e-05	0.179584	0.000228082	0.501224	0.503895	0.0374335	0.994336	0.34087	0.588128	0.000318583	0.741604	0	1	0	0	0	0	0	0	1	0	2
30823	FAM174B	3.77831e-05	0.000286588	0.0046861	0.00167378	0.0896764	0.432087	0.788129	0.022964	0.57551	0.20099	0.0502121	1	0	0	0	0	0	0	0	0	0	1
13632	RPL15	3.82283e-05	0.0474821	0.890509	0.285707	0.000274019	0.0242562	0.996636	0.295672	0.57551	6.97259e-05	0.659308	0	0	0	1	0	0	0	0	1	0	2
37750	PBD-2	3.83137e-05	0.109331	0.000471146	0.693384	0.000327774	0.104536	0.86343	0.0989601	0.498245	0.994099	0.184979	0	1	0	1	0	0	0	0	0	0	2
16955	MARCH5	3.83467e-05	0.545841	0.030857	0.367706	4.68509e-05	0.146508	0.820893	0.00040626	0.953395	0.0658354	0.331494	0	0	0	1	0	0	1	0	0	0	2
14386	HOXD1	3.83467e-05	6.81276e-05	0.027253	0.827024	0.117429	0.0393093	0.0599642	0.00239293	0.657998	0.453454	0.708385	1	0	0	0	0	0	0	0	0	0	1
25903	CKAP4	3.84257e-05	0.359166	0.361127	0.654101	0.213678	0.00012963	0.179651	8.79945e-05	0.995799	0.851228	0.956249	0	0	0	0	1	0	1	0	0	0	2
29401	DNAJA1	3.8528e-05	0.0775547	0.759004	0.767513	0.000251546	0.0596533	0.752615	0.128269	0.936886	9.64116e-05	0.118643	0	0	0	1	0	0	0	0	1	0	2
25173	C2H19orf42	3.88242e-05	0.00552321	0.752292	0.994959	0.00116064	0.005908	0.133782	0.987338	0.910587	0.0017824	0.0563732	0	0	0	0	0	0	0	0	0	0	0
10204	igfbp2	3.95472e-05	0.964379	0.338753	0.371487	0.00235542	0.0873423	0.39117	2.84062e-05	0.883512	0.0245877	0.648744	0	0	0	0	0	0	1	0	0	0	1
35508	Dynll2	3.99754e-05	0.109331	7.83474e-05	0.00988464	0.00456404	0.0441036	0.407722	0.504307	0.951403	0.220075	0.508719	0	1	0	0	0	0	0	0	0	0	1
28492	IBA57	4.01024e-05	0.0133228	0.405208	0.277533	2.71426e-05	0.0941239	0.957772	0.2506	0.796571	0.000547568	0.462531	0	0	0	1	0	0	0	0	1	0	2
24884	CDH13	4.03222e-05	0.673177	0.498046	0.725624	0.0273562	0.0358315	0.48654	0.100018	0.988822	2.0264e-05	0.0279196	0	0	0	0	0	0	0	0	1	0	1
20022	CYBA	4.08005e-05	0.784576	0.0468334	0.950729	0.000445457	0.0711164	0.974393	0.00065853	0.597104	0.185331	0.0537516	0	0	0	1	0	0	1	0	0	0	2
19950	CF792846	4.1306e-05	0.70126	0.32496	0.40229	0.148338	0.0093928	0.196357	0.383391	0.904138	0.000108321	0.0175656	0	0	0	0	0	0	0	0	1	0	1
23267	FADD	4.16015e-05	3.53512e-05	0.00281155	0.202564	4.82436e-05	0.254868	0.644008	0.758957	0.936886	0.427741	0.613095	1	0	0	1	0	0	0	0	0	0	2
14990	MACF1	4.1719e-05	0.571816	0.00284821	0.802733	0.956038	0.00723554	0.992143	0.335497	0.504932	7.00673e-05	0.783228	0	0	0	0	0	0	0	0	1	0	1
15144	ANK2	4.23067e-05	0.00105243	8.63294e-05	0.0366942	0.0241621	0.81362	0.998986	0.17398	0.955914	0.065981	0.596333	0	1	0	0	0	0	0	0	0	0	1
18936	HSPA2	4.25424e-05	0.158029	0.0258322	0.0874093	4.45366e-05	0.587274	0.746748	0.0054776	0.891077	0.0406749	0.690611	0	0	0	1	0	0	0	0	0	0	1
22969	EHD1	4.25993e-05	0.254263	0.0130975	0.341199	7.91058e-06	0.318516	0.927592	0.00224505	0.936886	0.0661349	0.292229	0	0	0	1	0	0	0	0	0	0	1
23360	CRIM1	4.25993e-05	0.474593	0.0273488	0.461555	0.518332	0.144359	0.924078	0.0128608	0.89277	1.50106e-05	0.112271	0	0	0	0	0	0	0	0	1	0	1
6092	TC258310	4.25993e-05	0.0265086	0.18004	0.366987	0.666356	0.296062	0.924078	3.29522e-05	0.944508	0.00380729	0.109341	0	0	0	0	0	0	1	0	0	0	1
2494	SCCPDH	4.28564e-05	0.253441	7.86449e-05	0.233521	0.0474871	0.00214283	0.875238	0.593252	0.707662	0.0299057	0.948808	0	1	0	0	0	0	0	0	0	0	1
22782	PPP2CB	4.28998e-05	0.335816	0.129252	9.85505e-05	0.104742	0.752597	0.00584551	0.827507	0.0749616	0.943174	0.00425328	0	0	1	0	0	0	0	0	0	0	1
13273	BTAF1	4.29712e-05	0.584879	0.799603	0.409731	0.0818202	0.655419	0.835263	0.000220382	0.725815	0.00196328	0.00847347	0	0	0	0	0	0	1	0	0	0	1
12996	DNMT3A	4.31602e-05	0.42818	0.0279332	0.0923789	1.85788e-05	0.261091	0.506734	0.00104999	0.882417	0.0556477	0.759384	0	0	0	1	0	0	0	0	0	0	1
2001	OBFC2A	4.31604e-05	0.0117105	0.457975	0.355724	0.000157935	0.0146785	0.850857	0.310929	0.817293	0.000192089	0.344147	0	0	0	1	0	0	0	0	1	0	2
9472	TC243676	4.33816e-05	0.782358	0.821642	0.789317	0.00232937	0.328978	0.676046	0.00784497	0.928732	2.20688e-05	0.0111504	0	0	0	0	0	0	0	0	1	0	1
29788	ABLIM3	4.33816e-05	0.384327	0.416975	0.970867	0.0557313	0.00172281	0.647148	1.52124e-05	0.82834	0.32722	0.328201	0	0	0	0	0	0	1	0	0	0	1
7223	HOMER2	4.34787e-05	0.637547	0.0136906	0.65286	0.371098	0.0648782	0.951129	0.0359103	0.782685	4.07625e-06	0.188278	0	0	0	0	0	0	0	0	1	0	1
32245	TMEM47	4.44857e-05	0.968181	0.14527	0.233278	0.129232	0.0489345	0.269238	0.109362	0.886069	2.18727e-05	0.00637748	0	0	0	0	0	0	0	0	1	0	1
19264	TC245274	4.45731e-05	0.216523	0.7044	0.834028	0.000176774	0.265818	0.835263	0.0166702	0.989435	7.9222e-05	0.0651186	0	0	0	1	0	0	0	0	1	0	2
13042	A1BG	4.45731e-05	0.0580599	0.00416521	0.109616	8.88477e-06	0.570488	0.913428	0.0255713	0.995799	0.136934	0.582658	0	0	0	1	0	0	0	0	0	0	1
39047	MLLT11	4.45731e-05	0.727648	0.711504	0.560897	0.00651371	0.18051	0.389944	0.0296625	0.84781	3.38016e-05	0.00482766	0	0	0	0	0	0	0	0	1	0	1
27048	EIF4EBP2	4.45731e-05	0.578911	0.368762	0.958095	0.000126251	0.840785	0.761841	0.00163243	0.72278	0.00316646	0.00901905	0	0	0	1	0	0	0	0	0	0	1
29636	GRK5	4.49507e-05	0.0260649	0.913039	0.977985	0.678995	0.000994158	0.238194	1.50758e-05	0.988024	0.356135	0.798847	0	0	0	0	1	0	1	0	0	0	2
29300	TC277064	4.50596e-05	0.861291	0.566029	0.643099	0.0301175	0.71029	0.852191	0.00152839	0.934302	7.66545e-05	0.0205271	0	0	0	0	0	0	0	0	1	0	1
27654	MAP1B	4.51422e-05	0.408289	0.594425	0.606411	0.0716179	0.710355	0.992143	6.51372e-05	0.909765	0.000394725	0.0302865	0	0	0	0	0	0	1	0	1	0	2
15355	RND3	4.54637e-05	0.0079585	0.969202	0.467982	0.266753	1.82713e-05	0.71648	0.0322619	0.588128	0.0840099	0.893407	0	0	0	0	1	0	0	0	0	0	1
1695	MITF	4.57053e-05	0.837657	0.69997	0.960183	0.00502904	0.250374	0.893649	0.0083873	0.943086	1.31751e-05	0.0639626	0	0	0	0	0	0	0	0	1	0	1
10472	C12orf4	4.59179e-05	0.469829	0.696101	0.109878	0.152165	0.0101523	0.00755924	9.50104e-05	0.474879	0.234279	0.564593	0	0	0	0	0	0	1	0	0	0	1
28562	VBP1	4.62533e-05	0.00261535	0.0141397	0.0031248	0.00106768	0.469471	0.736659	0.969541	0.566501	0.487953	0.550811	0	0	0	0	0	0	0	0	0	0	0
21701	DDIT4	4.64666e-05	0.114761	0.759157	0.80709	0.011455	0.0013601	0.769376	0.634141	0.736391	4.35485e-05	0.381633	0	0	0	0	0	0	0	0	1	0	1
32246	ECHS1	4.65145e-05	0.133583	0.0698365	0.526999	0.292295	0.92317	0.979865	0.000254449	0.941867	4.23879e-05	0.0917658	0	0	0	0	0	0	1	0	1	0	2
14527	BCAP31	4.69198e-05	0.0605195	0.00146288	0.00540617	2.96792e-05	0.321935	0.435534	0.0255038	0.796571	0.296804	0.956249	0	0	0	1	0	0	0	0	0	0	1
33923	TOPOII	4.71901e-05	0.186528	0.0185666	0.564934	0.000284938	0.442546	0.975042	0.0299276	0.812191	0.228954	0.24699	0	0	0	1	0	0	0	0	0	0	1
4291	VCAN	4.72942e-05	0.999728	0.630699	0.394402	0.0178709	0.415826	0.458231	0.00183241	0.304247	0.0365884	0.00185228	0	0	0	0	0	0	0	0	0	0	0
23405	ZKSCAN5	4.7869e-05	0.971784	0.0127156	0.34778	0.00880344	0.00147596	0.449473	0.00141049	0.914902	0.998206	0.857794	0	0	0	0	0	0	0	0	0	0	0
40996	TC273138	4.84423e-05	0.863731	0.882039	0.868211	0.00265732	0.937856	0.814266	8.21125e-05	0.841449	5.75609e-05	0.222722	0	0	0	0	0	0	1	0	1	0	2
17851	THY1	4.89477e-05	0.677251	0.0606377	0.400905	0.000279493	0.114887	0.781682	0.000261688	0.971998	0.0658967	0.382481	0	0	0	1	0	0	1	0	0	0	2
40579	CD14	4.89477e-05	0.557479	0.625389	0.639053	0.0455555	0.0244993	0.972705	3.72121e-05	0.529145	0.0994179	0.0200072	0	0	0	0	0	0	1	0	0	0	1
42745	AUH	4.90269e-05	0.212633	0.709683	0.417415	0.0673423	0.328673	0.979865	2.23787e-05	0.778703	0.0018144	0.0120314	0	0	0	0	0	0	1	0	0	0	1
30474	PSENEN	4.92976e-05	0.149805	0.886661	0.824268	0.00119135	0.0197483	0.818933	0.2111	0.812191	1.88504e-05	0.211085	0	0	0	0	0	0	0	0	1	0	1
28321	TC244618	5.04616e-05	0.791388	0.88909	0.335267	0.00249387	0.433561	0.212875	3.28129e-05	0.62799	0.00120497	0.817599	0	0	0	0	0	0	1	0	0	0	1
20428	HECA	5.04759e-05	0.970908	0.00445499	0.0150597	0.101716	0.000889168	0.0238941	0.0685773	0.810841	0.168461	0.196738	0	0	0	0	1	0	0	0	0	0	1
23276	CJ031114	5.04759e-05	0.002521	0.0661277	0.985654	0.000388425	0.140226	0.0516594	0.885754	0.513388	0.075124	0.0125658	0	0	0	1	0	0	0	0	0	0	1
34439	C7H6orf153	5.10006e-05	0.000599161	0.595912	0.418658	0.182456	0.000792826	0.561362	0.00919537	0.81237	0.532937	0.89475	1	0	0	0	1	0	0	0	0	0	2
23383	JPH3	5.10505e-05	0.0421256	0.603702	0.804415	0.000590985	0.0733329	0.638233	0.39485	0.994389	0.00166197	0.153611	0	0	0	1	0	0	0	0	0	0	1
37955	TC262959	5.13282e-05	0.942932	0.0541524	0.00129531	0.449007	0.0214522	0.00266965	0.503301	0.301964	0.143414	0.00513268	0	0	0	0	0	0	0	0	0	0	0
25704	DAK	5.15702e-05	0.000288019	0.321618	0.373488	0.207103	0.00155999	0.506734	0.0024576	0.888959	0.946128	0.849025	1	0	0	0	0	0	0	0	0	0	1
20729	DYNC1I2	5.15702e-05	0.062115	0.471062	0.918753	0.000144015	0.239479	0.235732	0.171547	0.733753	0.00175881	0.00739789	0	0	0	1	0	0	0	0	0	0	1
29941	NR3C1	5.15727e-05	0.962559	0.368667	0.820966	0.000193147	0.285365	0.912629	5.17107e-05	0.940056	0.00529728	0.113696	0	0	0	1	0	0	1	0	0	0	2
40173	FAM129A	5.16319e-05	0.623729	0.524058	0.923966	0.00663751	0.0435262	0.953969	1.72084e-05	0.756402	0.0434769	0.0563732	0	0	0	0	0	0	1	0	0	0	1
1671	TUBA4A	5.18345e-05	0.943962	0.00250815	0.756576	0.220295	8.18103e-05	0.871044	0.157072	0.532627	0.0340545	0.896987	0	0	0	0	1	0	0	0	0	0	1
27874	ARL8A	5.18345e-05	0.925627	0.882039	0.958095	0.00513423	0.971238	0.936958	0.00122829	0.907765	0.00111994	0.0465394	0	0	0	0	0	0	0	0	0	0	0
29814	SPP1	5.23859e-05	0.967171	0.103787	0.90309	0.00387633	0.0280972	0.923294	0.000369164	0.431429	0.261784	0.0238367	0	0	0	0	0	0	1	0	0	0	1
34365	SLC2A3	5.31139e-05	0.788089	0.864093	0.386214	0.00143292	0.826942	0.693207	0.000425905	0.655312	7.97845e-05	0.550309	0	0	0	0	0	0	1	0	1	0	2
38420	DGKD	5.33702e-05	0.00150534	0.00278175	0.00167378	2.35135e-05	0.659545	0.717666	0.370428	0.635971	0.114467	0.890701	0	0	0	1	0	0	0	0	0	0	1
1975	SH3BP5	5.33702e-05	0.437791	0.000272707	0.0559008	0.209052	0.00385456	0.396185	0.907077	0.969804	0.00525339	0.280662	0	1	0	0	0	0	0	0	0	0	1
17746	FBN1	5.40614e-05	0.734987	0.997023	0.978531	0.00646252	0.535577	0.874014	3.74387e-05	0.983912	0.00075588	0.136536	0	0	0	0	0	0	1	0	1	0	2
42431	ZXDC	5.45126e-05	0.981386	0.00987629	0.645287	0.935345	0.000114722	0.68925	0.881542	0.72278	0.000537217	0.606754	0	0	0	0	1	0	0	0	1	0	2
11244	CYP51	5.45204e-05	0.0514239	0.00314436	0.410991	2.35366e-05	0.52887	0.941259	0.0270378	0.794235	0.165027	0.177577	0	0	0	1	0	0	0	0	0	0	1
43534	EXOC4	5.46844e-05	0.829301	0.851505	0.803281	0.0162109	0.920197	0.964702	9.52604e-05	0.922256	0.000142163	0.0255647	0	0	0	0	0	0	1	0	1	0	2
11840	YPEL1	5.55148e-05	0.00097001	0.00329624	0.87625	0.0656494	0.690146	0.0175655	0.0782863	0.145963	0.216648	0.154896	1	0	0	0	0	0	0	0	0	0	1
24471	ZNF212	5.55148e-05	0.492155	0.922995	0.844344	0.00141408	0.32149	0.503188	0.0114626	0.836217	8.84701e-05	0.00704028	0	0	0	0	0	0	0	0	1	0	1
11039	ZFP1	5.60923e-05	0.848348	0.00121166	0.383632	0.306254	0.000176061	0.647148	0.448098	0.756412	0.00787579	0.783848	0	0	0	0	1	0	0	0	0	0	1
8111	RBM6	5.71407e-05	0.761379	0.902399	0.965474	0.00288733	0.305631	0.849147	0.00191064	0.994986	8.1329e-06	0.0298081	0	0	0	0	0	0	0	0	1	0	1
21022	GHR	5.75962e-05	0.123219	0.925503	0.864957	0.0607566	0.0192813	0.74482	3.59512e-06	0.859636	0.042534	0.136079	0	0	0	0	0	0	1	0	0	0	1
7934	IL13RA1	5.82999e-05	0.440925	0.346882	0.841793	0.0483793	0.961117	0.953969	0.000135223	0.920051	3.25866e-05	0.105824	0	0	0	0	0	0	1	0	1	0	2
4909	Nr6a1	5.82999e-05	0.27706	0.107845	0.299663	4.3365e-05	0.764219	0.902674	0.00243502	0.95148	0.00853351	0.368971	0	0	0	1	0	0	0	0	0	0	1
14346	NANS	5.82999e-05	0.98102	0.897457	0.364414	0.038102	0.755266	0.39117	0.00458351	0.624241	0.000718466	0.00243663	0	0	0	0	0	0	0	0	1	0	1
25012	FARS2	5.82999e-05	0.549751	0.0716389	0.0306602	0.485414	0.000520213	0.00408613	0.0407548	0.678771	0.168813	0.0790739	0	0	0	0	1	0	0	0	0	0	1
3886	TN-X	5.86327e-05	0.863731	0.937458	0.962549	0.00766386	0.54017	0.987212	2.37408e-05	0.934302	0.00058287	0.0530558	0	0	0	0	0	0	1	0	1	0	2
14875	CD48	5.90362e-05	0.74096	0.054101	0.87625	0.000266467	0.11191	0.994336	0.000678562	0.708178	0.126001	0.0775502	0	0	0	1	0	0	1	0	0	0	2
1821	ADAMTSL3	5.96723e-05	0.901505	0.911474	0.729071	0.00633734	0.587274	0.681283	6.14514e-05	0.853324	0.000966487	0.386363	0	0	0	0	0	0	1	0	1	0	2
5313	PTPN11	5.98888e-05	0.229426	0.832588	0.815033	0.00154694	0.0289228	0.890884	0.144273	0.790856	1.45003e-05	0.241868	0	0	0	0	0	0	0	0	1	0	1
7609	CXCR7	6.04371e-05	0.192067	0.519192	0.788855	0.0640274	0.00128542	0.230878	0.900987	0.991221	0.00020496	0.0814689	0	0	0	0	0	0	0	0	1	0	1
3188	SLC35B4	6.07354e-05	0.410328	0.660809	0.969119	0.00760565	0.0211439	0.808684	0.131917	0.839654	1.24675e-05	0.15539	0	0	0	0	0	0	0	0	1	0	1
32904	AK239601	6.12935e-05	0.220615	0.00110486	0.231773	0.00048505	0.0364349	0.893649	0.0158099	0.840026	0.791509	0.607839	0	0	0	1	0	0	0	0	0	0	1
14822	MTUS2	6.12935e-05	0.384987	0.24622	0.29714	0.190407	0.907108	0.0536051	0.00144375	0.113766	0.000271478	0.741198	0	0	0	0	0	0	0	0	1	0	1
34031	C19orf24	6.19801e-05	0.936638	0.933077	0.888662	0.00613054	0.689947	0.876452	2.356e-05	0.943086	0.000232063	0.166846	0	0	0	0	0	0	1	0	1	0	2
9047	TC292254	6.24741e-05	0.0461861	0.233215	0.155862	0.816448	0.371388	0.971666	0.000654576	0.783666	0.0215373	0.0516619	0	0	0	0	0	0	1	0	0	0	1
35157	TC274594	6.24741e-05	0.454302	0.42801	0.535631	0.0468129	0.00314782	0.171441	1.80715e-05	0.931204	0.263982	0.863887	0	0	0	0	0	0	1	0	0	0	1
9307	AK239973	6.297e-05	0.968049	0.0126851	0.660131	0.00185411	0.00224853	0.706215	0.000272483	0.77223	0.77022	0.424852	0	0	0	0	0	0	1	0	0	0	1
2310	SH3YL1	6.34613e-05	0.00261535	0.000372502	0.487057	4.57634e-05	0.857053	0.67386	0.631004	0.655312	0.784374	0.26129	0	1	0	1	0	0	0	0	0	0	2
11220	GLRX5	6.47016e-05	0.73238	0.824305	0.878905	0.00321802	0.283786	0.993907	2.63066e-05	0.827014	0.00309809	0.0298081	0	0	0	0	0	0	1	0	0	0	1
41752	ECM1	6.47016e-05	0.276728	0.725168	0.580299	0.162273	0.312045	0.994102	5.9542e-05	0.850473	0.00520512	0.0529324	0	0	0	0	0	0	1	0	0	0	1
35668	IKZF4	6.5604e-05	0.516568	0.781696	0.976807	0.00708992	0.0414875	0.832417	0.0361643	0.887683	8.34512e-06	0.103114	0	0	0	0	0	0	0	0	1	0	1
14674	CCPG1	6.56813e-05	0.654963	0.145704	0.410991	0.333564	0.00120918	0.185538	0.821522	0.982956	0.000155356	0.0531105	0	0	0	0	0	0	0	0	1	0	1
15721	KIF3C	6.58983e-05	0.840038	0.00372823	0.340639	0.636571	0.000323444	0.581357	0.900648	0.840026	0.00159976	0.487011	0	0	0	0	1	0	0	0	0	0	1
39540	AGBL3	6.63641e-05	0.850139	0.179628	0.90905	0.00635536	0.0102993	0.838481	5.04401e-05	0.790856	0.219081	0.196738	0	0	0	0	0	0	1	0	0	0	1
37008	FOXO1	6.64164e-05	0.802297	0.396655	0.973619	0.030604	0.03876	0.961537	0.0487894	0.747807	6.65053e-06	0.254042	0	0	0	0	0	0	0	0	1	0	1
7594	FGL2	6.64164e-05	0.0476689	0.00644579	0.00825182	0.628353	0.713483	0.542769	0.0293235	0.747859	0.00464504	0.017189	0	0	0	0	0	0	0	0	0	0	0
17060	ANKRD42	6.66326e-05	0.897791	0.407906	0.699641	0.0859057	0.355132	0.86639	0.00352182	0.996487	3.09077e-05	0.0473545	0	0	0	0	0	0	0	0	1	0	1
41083	LSM6	6.66661e-05	4.64443e-05	0.0150759	0.227303	0.202403	0.105628	0.628265	0.00111499	0.990047	0.176437	0.644845	1	0	0	0	0	0	0	0	0	0	1
9203	HSPE1	6.67421e-05	0.863719	0.715217	0.878352	0.000699078	0.880676	0.991615	0.000246785	0.991781	0.000452109	0.0884366	0	0	0	1	0	0	1	0	1	0	3
4153	TC265223	6.67421e-05	0.535795	0.23196	0.530947	0.0819664	0.70284	0.928084	0.000872373	0.987137	2.65373e-05	0.0292305	0	0	0	0	0	0	1	0	1	0	2
41493	NISCH	6.69834e-05	0.687996	0.382579	0.893058	8.04472e-05	0.729827	0.986759	0.000525346	0.901869	0.00204811	0.0535099	0	0	0	1	0	0	1	0	0	0	2
11046	CYP51	6.69972e-05	0.0200911	0.00209019	0.178709	1.33466e-05	0.709905	0.993667	0.0520381	0.918104	0.15263	0.374996	0	0	0	1	0	0	0	0	0	0	1
13988	NCOR1	6.69977e-05	0.834128	0.905824	0.984335	0.000832373	0.869621	0.961537	0.00116767	0.982033	0.000179123	0.0535099	0	0	0	1	0	0	0	0	1	0	2
17574	TC283413	6.69977e-05	0.778781	0.865499	0.670616	0.0121222	0.330078	0.510893	0.023885	0.84222	0.00021475	0.0103432	0	0	0	0	0	0	0	0	1	0	1
14517	GNAI2	6.73254e-05	0.911805	0.53509	0.880199	0.00473507	0.172303	0.974393	9.31154e-05	0.708178	0.0208765	0.0255647	0	0	0	0	0	0	1	0	0	0	1
23714	DBNDD2	6.73443e-05	0.957095	0.214137	0.976807	0.0914443	0.0451717	0.973818	0.0511574	0.733753	9.62318e-06	0.286616	0	0	0	0	0	0	0	0	1	0	1
10879	TC288737	6.73443e-05	0.914307	0.00663291	0.113598	0.00143292	0.00484064	0.229553	0.00116767	0.976964	0.851835	0.991133	0	0	0	0	0	0	0	0	0	0	0
3877	ZNF3	6.8014e-05	0.0100383	0.391666	0.00346216	0.0049073	0.0582258	0.605036	0.926827	0.171519	0.062441	0.35005	0	0	0	0	0	0	0	0	0	0	0
19192	DHRS7	6.84923e-05	0.570672	0.995401	0.72417	0.0341842	0.287988	0.407722	3.0678e-05	0.796571	0.00380729	0.626438	0	0	0	0	0	0	1	0	0	0	1
6987	PRKD1	6.93766e-05	0.0144559	0.93077	0.92111	0.474374	0.000856747	0.11631	1.52884e-05	0.969804	0.509089	0.901993	0	0	0	0	1	0	1	0	0	0	2
34913	FXYD6	6.95357e-05	0.550756	0.619663	0.218101	0.00959117	0.0572566	0.0599642	2.37408e-05	0.658719	0.0395398	0.99542	0	0	0	0	0	0	1	0	0	0	1
27079	CASP10	7.02185e-05	0.00890609	0.321575	0.105954	0.000159477	0.0325396	0.996817	0.395847	0.655312	0.00099831	0.751453	0	0	0	1	0	0	0	0	1	0	2
13739	GMFG	7.08961e-05	0.569555	0.032518	0.817645	0.000405052	0.102777	0.986759	0.0010317	0.687319	0.15464	0.0862548	0	0	0	1	0	0	0	0	0	0	1
18304	KIAA1143	7.10892e-05	0.750942	0.0115773	0.638194	0.527257	1.63652e-05	0.450436	0.0925588	0.754345	0.0189556	0.863439	0	0	0	0	1	0	0	0	0	0	1
29285	DN107111	7.11201e-05	0.00106379	0.590616	0.411105	0.0202815	0.000151764	0.555283	0.199123	0.805914	0.0386827	0.845768	0	0	0	0	1	0	0	0	0	0	1
5561	AK239240	7.11229e-05	0.989334	0.758231	0.491826	0.00268132	0.559558	0.552704	5.5025e-05	0.796319	0.00107717	0.527568	0	0	0	0	0	0	1	0	0	0	1
21226	PANX1	7.11229e-05	0.553232	0.497981	0.843279	0.0237285	0.0164339	0.973136	2.72002e-05	0.654976	0.125479	0.0554133	0	0	0	0	0	0	1	0	0	0	1
30861	RIC8A	7.11229e-05	0.896701	0.444888	0.0856197	0.178697	0.119944	0.0578522	0.245	0.561633	0.00119359	0.00128281	0	0	0	0	0	0	0	0	0	0	0
36122	TC283580	7.12713e-05	0.00016005	0.00020366	0.0610424	8.95692e-05	0.864223	0.951129	0.881599	0.970053	0.986511	0.943648	1	1	0	1	0	0	0	0	0	0	3
15065	CLU	7.16687e-05	0.804917	0.00592002	0.994797	0.00112997	0.0123389	0.933158	0.00311875	0.31513	0.835619	0.0551531	0	0	0	0	0	0	0	0	0	0	0
11321	PAPD4	7.17927e-05	0.133436	0.0579954	0.001431	0.000369212	0.879951	0.131505	0.0947391	0.31029	0.135549	0.47062	0	0	0	1	0	0	0	0	0	0	1
36766	PRKRA	7.19917e-05	0.937496	0.43435	0.693384	0.0462346	0.331912	0.830726	0.00352928	0.990889	1.77092e-05	0.0297252	0	0	0	0	0	0	0	0	1	0	1
43609	CF178442	7.20815e-05	0.000375982	0.111442	0.714764	0.000183459	0.0493093	0.27583	0.897548	0.887572	0.0515183	0.185418	1	0	0	1	0	0	0	0	0	0	2
42887	CH242-134A11.1	7.22572e-05	0.687037	0.121399	0.757919	0.127798	0.00387955	0.566705	0.435937	0.866356	1.29079e-05	0.124238	0	0	0	0	0	0	0	0	1	0	1
36616	BCAT1	7.27882e-05	0.896263	0.222692	0.867438	0.000996061	0.164444	0.974393	0.000158076	0.834779	0.0303366	0.102816	0	0	0	1	0	0	1	0	0	0	2
43927	ADA	7.27882e-05	0.130949	0.942992	0.850688	0.253498	0.0048067	0.192713	1.0019e-05	0.917738	0.152415	0.81789	0	0	0	0	0	0	1	0	0	0	1
13040	SLAIN2	7.27882e-05	0.567124	0.487452	0.559687	0.0524469	0.0199142	0.267562	0.286808	0.922091	8.45705e-05	0.0191589	0	0	0	0	0	0	0	0	1	0	1
10010	AMIGO2	7.31941e-05	0.00324408	0.00132057	0.193796	0.0292199	0.998453	0.90616	0.2955	0.887683	0.261413	0.928357	0	0	0	0	0	0	0	0	0	0	0
20789	G3BP1	7.32039e-05	0.968181	0.112633	0.698359	0.246893	0.0352157	0.798268	0.104845	0.885103	2.69825e-05	0.134119	0	0	0	0	0	0	0	0	1	0	1
23944	TC294229	7.33061e-05	0.00795674	0.227631	0.994797	0.000133476	0.147599	0.175833	0.589352	0.733753	0.0124503	0.0228731	0	0	0	1	0	0	0	0	0	0	1
41927	ATXN10	7.38627e-05	0.874996	0.0827292	0.972678	0.242185	0.0574924	0.924078	0.0362361	0.51722	9.74875e-06	0.617527	0	0	0	0	0	0	0	0	1	0	1
19	Ccar1	7.57797e-05	0.99471	0.706339	0.958672	0.132914	0.522565	0.978658	0.0372826	0.94149	0.00225488	0.28179	0	0	0	0	0	0	0	0	0	0	0
19851	SEC24D	7.60629e-05	0.218299	0.0437068	0.104693	4.51213e-05	0.611383	0.716221	0.00611354	0.870684	0.0389978	0.717273	0	0	0	1	0	0	0	0	0	0	1
43057	SDS	7.66705e-05	0.121995	0.00554245	0.0240203	0.759576	0.356686	0.544254	0.0661894	0.84222	0.00159162	0.0281985	0	0	0	0	0	0	0	0	0	0	0
28275	C19orf38	7.68748e-05	0.962521	0.964603	0.991455	0.0033989	0.985864	0.989779	0.000859731	0.982033	0.000407386	0.0705703	0	0	0	0	0	0	1	0	1	0	2
33291	GALNS	7.68748e-05	0.956643	0.0670758	0.813745	0.00735257	0.0039161	0.830726	0.00016708	0.761201	0.479812	0.288757	0	0	0	0	0	0	1	0	0	0	1
32155	ADNP	7.68837e-05	0.0010195	0.00321178	0.019353	0.000639764	0.66596	0.964337	0.872606	0.850908	0.810676	0.846056	0	0	0	1	0	0	0	0	0	0	1
32578	RAB2A	7.70484e-05	0.772868	0.0326139	0.111368	0.000147549	0.0705018	0.331151	0.000468107	0.894946	0.164296	0.86468	0	0	0	1	0	0	1	0	0	0	2
18005	DDX18	7.75135e-05	0.955457	0.00435132	0.10265	0.180083	0.000323444	0.151443	0.120636	0.991275	0.0781672	0.468134	0	0	0	0	1	0	0	0	0	0	1
1077	DDOST	7.82061e-05	0.33654	0.124123	0.782095	0.690776	1.12532e-05	0.300418	0.0135993	0.838238	0.121008	0.908184	0	0	0	0	1	0	0	0	0	0	1
22156	DHX33	7.84303e-05	0.0869013	0.69997	0.0223629	0.354786	0.00149184	0.571751	0.287464	0.0270657	0.0397659	0.0882551	0	0	0	0	0	0	0	0	0	0	0
18024	MSRB2	7.87914e-05	0.0138177	0.000768817	0.62415	0.000176774	0.608704	0.647949	0.321068	0.555152	0.703803	0.148868	0	1	0	1	0	0	0	0	0	0	2
1927	CDC5L	7.96508e-05	0.531969	0.0156016	0.181559	0.00119135	0.0747223	0.633237	0.0084279	0.995799	0.520071	0.845559	0	0	0	0	0	0	0	0	0	0	0
2972	MARCKS	8.06929e-05	0.450451	0.131796	0.653187	3.15521e-05	0.617898	0.992143	0.00135149	0.931808	0.00975545	0.13238	0	0	0	1	0	0	0	0	0	0	1
21794	TMSB10	8.06929e-05	0.593679	0.00851504	0.299238	0.000486035	0.0237148	0.719128	0.00113215	0.916176	0.428863	0.568578	0	0	0	1	0	0	0	0	0	0	1
26880	TCP11L2	8.06929e-05	0.768784	0.0330982	0.718367	0.948297	4.8056e-05	0.542746	0.448098	0.771046	0.0034514	0.679246	0	0	0	0	1	0	0	0	0	0	1
311	UBA2	8.1207e-05	0.911805	0.461071	0.744346	0.000536107	0.466963	0.893547	0.000203823	0.995799	0.00491808	0.198688	0	0	0	1	0	0	1	0	0	0	2
9060	DUROC-SLA-11	8.1272e-05	0.305712	0.0747736	0.212516	0.000326957	0.588813	0.820893	0.00752044	0.932226	0.0513789	0.628691	0	0	0	1	0	0	0	0	0	0	1
12391	fbxo11	8.1522e-05	0.832839	0.010597	0.109684	0.97237	0.00769591	0.279628	0.624598	0.965402	0.000348901	0.0563732	0	0	0	0	0	0	0	0	1	0	1
34736	TRNT1	8.17257e-05	0.338482	0.296488	0.521944	0.592917	5.89177e-05	0.989394	0.457134	0.21019	0.00513961	0.729981	0	0	0	0	1	0	0	0	0	0	1
25547	BX923808	8.22817e-05	0.199735	0.953099	0.578821	0.00153106	0.0693504	0.979865	0.122849	0.754345	0.000115421	0.422062	0	0	0	0	0	0	0	0	1	0	1
17111	DBN1	8.24412e-05	0.887702	0.390516	0.222708	0.00131899	0.35215	0.407722	0.000104373	0.768602	0.00623717	0.7457	0	0	0	0	0	0	1	0	0	0	1
16799	TC246946	8.24566e-05	0.976774	0.708885	0.892052	0.00376266	0.422936	0.91609	3.01535e-05	0.987284	0.00154879	0.133302	0	0	0	0	0	0	1	0	0	0	1
8522	NCF2	8.32948e-05	0.692925	0.565791	0.810522	0.0296099	0.0331065	0.994886	3.70272e-05	0.635971	0.0741935	0.0388371	0	0	0	0	0	0	1	0	0	0	1
8664	METTL5	8.33975e-05	0.0480257	0.114503	0.763858	0.00155713	0.607994	0.676537	0.457134	0.840919	0.120988	0.211827	0	0	0	0	0	0	0	0	0	0	0
490	TC273374	8.35144e-05	0.872966	0.52257	0.97584	0.00024578	0.655789	0.98387	0.000293594	0.870913	0.0019953	0.0397368	0	0	0	1	0	0	1	0	0	0	2
33482	ARL6IP5	8.45628e-05	0.0145744	0.111455	0.236	1.07992e-05	0.419303	0.975381	0.152504	0.909765	0.00578585	0.430926	0	0	0	1	0	0	0	0	0	0	1
41675	U6	8.47295e-05	0.38859	0.85444	0.988937	0.00137482	0.207314	0.670704	0.00678543	0.931204	2.79144e-05	0.0213322	0	0	0	0	0	0	0	0	1	0	1
5883	DCN	8.51641e-05	0.860919	0.727931	0.911143	0.0263653	0.899406	0.844396	0.00039117	0.800138	0.000104497	0.319535	0	0	0	0	0	0	1	0	1	0	2
22435	DIAPH1	8.51641e-05	0.0184284	0.717212	0.418658	0.806051	0.000145765	0.893789	0.000325104	0.437558	0.8129	0.211827	0	0	0	0	1	0	1	0	0	0	2
9910	RI	8.51641e-05	0.592095	0.00147519	0.12206	0.830838	0.0108954	0.467694	0.589793	0.964586	0.000241687	0.120406	0	0	0	0	0	0	0	0	1	0	1
22733	PHF20L1	8.53304e-05	0.319106	0.137809	0.070428	2.99419e-05	0.804426	0.522762	0.00407843	0.71877	0.00906582	0.853875	0	0	0	1	0	0	0	0	0	0	1
25999	GNAI2	8.56931e-05	0.968328	0.375365	0.962178	0.00361011	0.126419	0.991615	0.000112655	0.711404	0.0362124	0.039506	0	0	0	0	0	0	1	0	0	0	1
19831	SYCP2	8.56931e-05	0.0717788	0.778141	0.586204	0.0938299	0.000144146	0.86721	0.730922	0.558627	0.00162561	0.900154	0	0	0	0	1	0	0	0	0	0	1
12100	KIF1B	8.58791e-05	0.68383	0.676262	0.754982	0.0467863	0.949487	0.984515	0.000141621	0.953731	0.000160228	0.0407174	0	0	0	0	0	0	1	0	1	0	2
1293	NOP2	8.60367e-05	0.960471	0.943545	0.795607	0.00263255	0.840375	0.827317	0.00122453	0.883512	0.000127466	0.0125658	0	0	0	0	0	0	0	0	1	0	1
30591	TTF1	8.67643e-05	0.327569	0.969202	0.919577	0.00174885	0.146658	0.830654	0.0682222	0.950993	0.000146575	0.118155	0	0	0	0	0	0	0	0	1	0	1
8154	GEMIN5	8.67643e-05	0.968049	0.0107477	0.0623306	0.0417987	0.00110032	0.0884959	0.0125494	0.901869	0.578862	0.611751	0	0	0	0	0	0	0	0	0	0	0
11559	TC270569	8.72091e-05	0.0848429	0.176377	0.00336222	0.000895886	0.692348	0.301185	0.275734	0.275275	0.0669014	0.532191	0	0	0	1	0	0	0	0	0	0	1
5321	KCNK13	8.72423e-05	0.930384	0.224016	0.756051	0.000223163	0.189418	0.887763	0.000101418	0.923306	0.0189898	0.163638	0	0	0	1	0	0	1	0	0	0	2
6122	RPL23	8.73725e-05	0.0102986	0.000634432	0.0255896	0.275732	0.65513	0.884363	0.0384973	0.955914	0.00530335	0.148151	0	1	0	0	0	0	0	0	0	0	1
29057	MIPEP	8.73725e-05	0.910796	0.0183978	0.0280259	0.896755	0.00863268	0.0641981	0.947442	0.795653	0.00316197	0.0203649	0	0	0	0	0	0	0	0	0	0	0
9417	CN156970	8.76864e-05	0.908837	0.562401	0.709842	0.0170483	0.632865	0.870973	0.00174572	0.965515	3.83627e-05	0.0242663	0	0	0	0	0	0	0	0	1	0	1
39333	PRDX4	8.77043e-05	0.906514	0.976461	0.0463958	0.0486774	0.851626	0.0300801	0.00510379	0.145129	0.009268	0.498456	0	0	0	0	0	0	0	0	0	0	0
21880	CTNNA3	8.84993e-05	0.0388003	0.58016	0.195444	0.000307547	0.0837301	0.992143	0.321068	0.655312	0.00110655	0.754089	0	0	0	1	0	0	0	0	0	0	1
37840	SLTM	8.92714e-05	0.180648	0.592743	0.90905	0.0734087	0.000226369	0.700622	0.899156	0.747859	0.000124754	0.460882	0	0	0	0	1	0	0	0	1	0	2
2430	PGM1	8.92714e-05	0.00984296	0.697953	0.0236794	0.00172381	0.0155915	0.835368	0.956456	0.23255	0.00437737	0.741907	0	0	0	0	0	0	0	0	0	0	0
6386	AK236215	9.03195e-05	0.977538	0.986773	0.731919	0.0125518	0.929448	0.811417	0.000136058	0.794614	0.000240673	0.00896946	0	0	0	0	0	0	1	0	1	0	2
35375	DEPTOR	9.03195e-05	0.958395	0.099065	0.226143	0.00705659	0.0155461	0.3075	0.00027981	0.920051	0.292011	0.900001	0	0	0	0	0	0	1	0	0	0	1
21902	CCDC71L	9.03195e-05	0.874225	0.0398981	0.746833	0.440963	0.00187565	0.686733	0.675985	0.790856	4.44002e-05	0.298014	0	0	0	0	0	0	0	0	1	0	1
6821	TC295856	9.08442e-05	0.0545548	0.0248651	0.606211	2.00827e-05	0.946166	0.851389	0.0510968	0.823628	0.0532967	0.118154	0	0	0	1	0	0	0	0	0	0	1
35722	CAPN6	9.11095e-05	0.77265	0.146999	0.175366	0.0179633	0.00495877	0.0857508	0.000202146	0.84222	0.517491	0.937894	0	0	0	0	0	0	1	0	0	0	1
17340	Ndrg2	9.11101e-05	0.780862	0.0279075	0.564934	0.329289	0.0587441	0.845561	0.061928	0.86386	9.40886e-06	0.12009	0	0	0	0	0	0	0	0	1	0	1
37583	TC259630	9.12771e-05	0.00164232	0.0185573	0.0016077	0.187063	0.443084	0.647148	0.0282379	0.484551	0.222272	0.0224509	0	0	0	0	0	0	0	0	0	0	0
28955	FAM217B	9.27577e-05	0.0634518	0.930813	0.669659	0.644603	0.000554263	0.787585	7.83912e-05	0.718508	0.658234	0.312103	0	0	0	0	1	0	1	0	0	0	2
23641	ZFHX3	9.32618e-05	0.368534	0.626294	0.903299	0.035174	0.00565413	0.481551	0.365755	0.956128	5.45833e-05	0.0871837	0	0	0	0	0	0	0	0	1	0	1
27405	TC262752	9.33268e-05	0.570672	0.520761	0.554361	0.0260545	0.0324744	0.930161	0.00010136	0.431429	0.145981	0.0111385	0	0	0	0	0	0	1	0	0	0	1
23302	RMND5B	9.41815e-05	0.764807	0.0230076	0.268947	0.781089	0.0192813	0.569736	0.24429	0.979071	0.000117508	0.0897931	0	0	0	0	0	0	0	0	1	0	1
29672	LAMA2	9.69033e-05	0.205258	0.741859	0.559686	0.000117084	0.288069	0.992872	0.0308975	0.835393	0.000129297	0.277598	0	0	0	1	0	0	0	0	1	0	2
2266	Vash2	9.70867e-05	0.0118177	0.00105916	0.945046	0.000348236	0.72008	0.269238	0.61147	0.266043	0.912148	0.0508279	0	0	0	1	0	0	0	0	0	0	1
32907	TMEM126B	9.72705e-05	0.955074	0.0307919	0.591835	0.632632	0.00129238	0.614516	0.675414	0.834779	7.15595e-05	0.244531	0	0	0	0	0	0	0	0	1	0	1
31641	PSMC1	9.81903e-05	0.993622	0.472261	0.545441	0.00122546	0.278749	0.647148	8.07352e-05	0.921002	0.00809379	0.430926	0	0	0	0	0	0	1	0	0	0	1
33004	CN158171	9.83463e-05	0.410911	0.228785	0.658752	0.306454	0.000616784	0.999046	0.951913	0.30048	0.000501946	0.976311	0	0	0	0	1	0	0	0	1	0	2
18665	C19orf24	9.83969e-05	0.964379	0.874234	0.9261	0.00526369	0.655789	0.937083	3.01449e-05	0.989583	0.000370398	0.119004	0	0	0	0	0	0	1	0	1	0	2
41503	NMT1	9.83969e-05	0.041058	0.0333694	0.00229246	6.37978e-05	0.949487	0.334582	0.167948	0.46445	0.100136	0.664071	0	0	0	1	0	0	0	0	0	0	1
34980	AK237669	9.90262e-05	0.00640503	0.0130222	0.0810887	0.499494	0.734333	0.992143	0.00802176	0.916422	0.0272839	0.17583	0	0	0	0	0	0	0	0	0	0	0
26413	DYNC1I2	9.9088e-05	0.373635	0.978163	0.70719	0.00248788	0.159659	0.297696	0.0914814	0.810774	0.000204393	0.00654382	0	0	0	0	0	0	0	0	1	0	1
31368	GALNS	0.000100681	0.357038	0.00145438	0.313814	0.00059949	0.0155461	0.874867	0.00650769	0.802484	0.805622	0.542829	0	0	0	1	0	0	0	0	0	0	1
31284	HSF2BP	0.0001025	0.918597	0.622757	0.635537	0.0120245	0.67976	0.627393	0.00117718	0.558627	3.47248e-05	0.656237	0	0	0	0	0	0	0	0	1	0	1
33062	SAMD4A	0.00010263	0.0862287	0.626153	0.595775	0.000379433	0.0478161	0.874868	0.045792	0.888959	3.43767e-05	0.176815	0	0	0	1	0	0	0	0	1	0	2
7727	TC259056	0.000102845	0.233705	0.167985	0.925989	0.990915	9.53943e-06	0.42319	0.0511648	0.758261	0.0320765	0.899079	0	0	0	0	1	0	0	0	0	0	1
42417	CTNNAL1	0.000102845	0.0184929	6.28973e-05	0.025942	0.00427824	0.199432	0.821568	0.942413	0.978476	0.22298	0.730519	0	1	0	0	0	0	0	0	0	0	1
20508	LIPT1	0.000104065	0.069826	0.099065	0.00492078	0.000225906	0.800742	0.394952	0.122066	0.421691	0.038869	0.777192	0	0	0	1	0	0	0	0	0	0	1
1261	TC268112	0.000104447	0.927662	0.747651	0.539682	0.0126551	0.815065	0.716768	0.00164274	0.821797	0.000146575	0.00670991	0	0	0	0	0	0	0	0	1	0	1
9025	AMZ2	0.000105298	0.00247786	0.776817	0.971056	0.626701	0.000714793	0.05294	0.00101233	0.883512	0.935073	0.76368	0	0	0	0	1	0	0	0	0	0	1
37566	P15RS	0.00010552	0.945088	0.0349796	0.14853	0.959776	0.000369808	0.120893	0.943094	0.935161	0.00113746	0.0740973	0	0	0	0	1	0	0	0	0	0	1
11935	SAMD4A	0.000105946	0.0819951	0.720759	0.558602	0.000632769	0.0272789	0.893627	0.0920077	0.834779	4.19881e-05	0.248824	0	0	0	1	0	0	0	0	1	0	2
26711	ATP6AP1L	0.000105946	0.866677	0.374964	0.366378	0.13412	0.0211163	0.244568	0.103723	0.858199	3.59052e-05	0.0089285	0	0	0	0	0	0	0	0	1	0	1
694	DB801903	0.00010622	0.115931	0.0647324	0.640671	4.35651e-05	0.951141	0.906532	0.019991	0.865974	0.0209496	0.109341	0	0	0	1	0	0	0	0	0	0	1
4900	TC239484	0.00010632	0.154857	0.949261	0.976089	0.0900635	0.0225819	0.456955	6.46666e-06	0.996778	0.0481756	0.424967	0	0	0	0	0	0	1	0	0	0	1
37947	ABHD13	0.000106556	0.521586	0.411842	0.866681	0.0252135	0.0159179	0.604505	0.236278	0.924946	1.77709e-05	0.0841312	0	0	0	0	0	0	0	0	1	0	1
25610	TC288358	0.000106875	0.868194	0.00444103	0.702303	0.953087	0.00388912	0.893547	0.673877	0.655312	0.000113157	0.580678	0	0	0	0	0	0	0	0	1	0	1
39718	CALCR	0.000107308	0.757439	0.164782	0.402581	0.239414	0.261091	0.727579	0.0174184	0.969804	7.39282e-05	0.0333644	0	0	0	0	0	0	0	0	1	0	1
23723	FBLIM1	0.00011072	0.488434	0.863894	0.993926	0.0162833	0.499481	0.788379	2.869e-05	0.945215	0.0006834	0.196738	0	0	0	0	0	0	1	0	1	0	2
15254	TC241667	0.00011072	0.0926504	0.97318	0.466986	0.31873	0.00827292	0.965208	3.41888e-05	0.612362	0.21518	0.0657827	0	0	0	0	0	0	1	0	0	0	1
25202	LUC7L2	0.000111813	0.0175145	0.0222142	0.976074	0.000323521	0.809585	0.129347	0.399772	0.319036	0.19171	0.00944416	0	0	0	1	0	0	0	0	0	0	1
32817	MYOF	0.000111873	0.87986	0.996441	0.507214	0.0460378	0.724516	0.728934	0.000934106	0.655312	0.00481159	0.00808706	0	0	0	0	0	0	1	0	0	0	1
11003	AQP1	0.000114713	0.581861	0.991529	0.654727	0.0152991	0.345436	0.379424	4.22558e-05	0.775609	0.00295453	0.651798	0	0	0	0	0	0	1	0	0	0	1
14630	ACADSB	0.000114909	0.638499	0.822809	0.89848	0.0459562	0.717192	0.967351	0.000210393	0.989435	0.00118361	0.113309	0	0	0	0	0	0	1	0	0	0	1
4382	CSNK1E	0.000115513	0.587392	0.912947	0.899237	0.046513	0.427192	0.651313	2.70444e-05	0.865521	0.00135219	0.395239	0	0	0	0	0	0	1	0	0	0	1
13288	BAG3	0.000116071	0.00838748	0.745188	0.0874093	0.0129341	0.00175404	0.993667	0.707061	0.380524	0.011037	0.864307	0	0	0	0	0	0	0	0	0	0	0
23737	TC257180	0.000117347	0.00489635	0.957447	0.78898	0.23885	9.77008e-05	0.394952	0.0385061	0.817105	0.0915186	0.907629	0	0	0	0	1	0	0	0	0	0	1
14587	TC257571	0.000117358	0.752375	0.163998	0.124364	0.219946	0.317937	0.379424	0.0260962	0.790856	0.000133227	0.00424085	0	0	0	0	0	0	0	0	1	0	1
29872	ZNF655	0.000122616	0.693819	0.00060549	0.213797	0.552758	0.00306268	0.558837	0.988188	0.863087	0.000818055	0.356275	0	1	0	0	0	0	0	0	1	0	2
13637	DUS2L	0.00012361	0.946815	0.0889066	0.0139792	0.929832	0.00724351	0.00940665	0.800697	0.558627	0.0211239	0.00789673	0	0	0	0	0	0	0	0	0	0	0
774	comP	0.000124278	0.480644	0.591718	0.430604	0.171794	0.800692	0.903171	0.000576628	0.81886	0.00194671	0.0248212	0	0	0	0	0	0	1	0	0	0	1
21814	GRK5	0.000124523	0.504774	0.0873982	0.323447	0.000190172	0.345765	0.802256	0.0010351	0.977915	0.0339324	0.458389	0	0	0	1	0	0	0	0	0	0	1
43049	TC249420	0.000124523	0.485152	0.00974837	0.18899	0.000496845	0.0428073	0.676537	0.00162436	0.981119	0.343028	0.689162	0	0	0	1	0	0	0	0	0	0	1
7405	FBXO7	0.000124523	0.925085	0.0311985	0.742329	0.0211058	0.00372589	0.882098	0.00312261	0.179824	0.961198	0.0344812	0	0	0	0	0	0	0	0	0	0	0
27240	LY96	0.000126219	0.073764	0.00020366	0.309921	0.00032307	0.0673853	0.994336	0.0804963	0.704588	0.994652	0.469807	0	1	0	1	0	0	0	0	0	0	2
36311	COX19	0.000127158	0.800729	0.439711	0.973298	0.0446633	0.0592524	0.893547	0.0880122	0.840026	3.60968e-05	0.198869	0	0	0	0	0	0	0	0	1	0	1
24741	G3BP1	0.000127178	0.955074	0.199368	0.714683	0.110894	0.124011	0.832741	0.0368231	0.931838	2.58346e-05	0.0858055	0	0	0	0	0	0	0	0	1	0	1
27604	EIF4G2	0.000128652	6.78876e-05	0.00262367	0.629673	0.00226316	0.341863	0.242984	0.244989	0.689071	0.916792	0.483254	1	0	0	0	0	0	0	0	0	0	1
28363	TANC2	0.000129924	0.403367	0.312381	0.495018	0.000278109	0.962652	0.95956	0.00735606	0.950993	0.00663348	0.343235	0	0	0	1	0	0	0	0	0	0	1
1929	FASTKD3	0.000131549	0.677346	0.897457	0.797548	0.0292199	0.20161	0.994336	3.01535e-05	0.790856	0.00733242	0.0349936	0	0	0	0	0	0	1	0	0	0	1
28349	MED19	0.00013281	0.852878	0.492185	0.254216	0.00321802	0.127299	0.179751	7.45656e-05	0.754345	0.0286058	0.900001	0	0	0	0	0	0	1	0	0	0	1
2526	TC272903	0.000134493	0.740085	0.00597939	0.328996	0.00053256	0.0175413	0.670529	0.00218135	0.904661	0.678728	0.664071	0	0	0	1	0	0	0	0	0	0	1
33542	RALB	0.000134493	0.96006	0.234351	0.25677	0.00573049	0.0390721	0.257333	0.000104159	0.858199	0.111819	0.876114	0	0	0	0	0	0	1	0	0	0	1
27247	AY609435	0.000135291	0.0265771	0.524788	0.580299	0.000111301	0.0959887	0.819214	0.294854	0.91889	0.000876205	0.258469	0	0	0	1	0	0	0	0	1	0	2
18255	TACC2	0.000135349	0.809091	0.0947076	0.519168	0.000313142	0.13663	0.796773	0.000432232	0.959206	0.0762018	0.360921	0	0	0	1	0	0	1	0	0	0	2
557	ZEB1	0.000136824	0.957257	0.554571	0.896726	0.0136053	0.316992	0.913598	0.00839289	0.949794	2.31323e-05	0.0711954	0	0	0	0	0	0	0	0	1	0	1
18171	ISCA2	0.000137559	0.00193018	0.142135	0.0353908	0.0928637	0.0701301	0.98387	0.0701773	0.627625	0.989476	0.34506	0	0	0	0	0	0	0	0	0	0	0
30235	CLCN5	0.000137685	0.511737	0.457459	0.907505	0.111958	0.00281996	0.605029	9.09396e-05	0.900932	0.423485	0.542188	0	0	0	0	0	0	1	0	0	0	1
28727	CLSTN1	0.00013799	0.580852	0.503906	0.903835	0.0875702	0.978162	0.676537	0.000444009	0.711404	0.000225117	0.541009	0	0	0	0	0	0	1	0	1	0	2
40193	SH3BGRL2	0.000138268	0.914218	0.028407	0.994959	0.762202	9.61072e-05	0.974393	0.426758	0.397619	0.00946503	0.881513	0	0	0	0	1	0	0	0	0	0	1
24865	BDH2	0.000138782	0.508093	0.079916	0.729071	0.419321	0.0004355	0.996636	0.933894	0.246416	0.00020126	0.961353	0	0	0	0	1	0	0	0	1	0	2
11557	ZNF629	0.000139187	0.266295	0.116407	0.802395	0.492575	9.38715e-05	0.917878	0.525536	0.374406	0.000865681	0.986759	0	0	0	0	1	0	0	0	1	0	2
2961	HIST2H2AA3	0.000139187	0.0138177	0.962816	0.854434	0.010751	0.00114026	0.450436	0.840765	0.868611	0.00121818	0.371485	0	0	0	0	0	0	0	0	0	0	0
9330	C1H6orf35	0.000139578	0.452837	0.592743	0.976881	0.0630527	0.00192922	0.782574	0.292978	0.810991	2.66656e-05	0.274002	0	0	0	0	0	0	0	0	1	0	1
1719	AIF1	0.000139578	0.996123	0.130367	0.927726	0.00278759	0.0415953	0.961537	0.000342826	0.743546	0.207075	0.134665	0	0	0	0	0	0	1	0	0	0	1
1580	Jam2	0.00014353	0.958395	0.133921	0.364981	0.0170696	0.0069563	0.358165	0.000210729	0.968339	0.370115	0.856605	0	0	0	0	0	0	1	0	0	0	1
29479	C10orf97	0.000143885	0.0182897	0.000460608	0.0797773	0.386494	0.495078	0.935049	0.0638064	0.974312	0.00221514	0.215127	0	1	0	0	0	0	0	0	0	0	1
27940	DN109128	0.000144663	6.26569e-05	0.243225	0.502773	0.0737798	0.00372204	0.343111	0.0097494	0.972932	0.759891	0.972471	1	0	0	0	0	0	0	0	0	0	1
4873	C14orf118	0.000145036	0.00324408	0.000158621	0.0147909	0.00111006	0.678114	0.903436	0.993002	0.969695	0.639819	0.807397	0	1	0	0	0	0	0	0	0	0	1
16761	TC299611	0.000145431	0.0963456	0.707445	0.918753	0.000569079	0.146658	0.294009	0.229713	0.812191	0.0011809	0.0160883	0	0	0	1	0	0	0	0	0	0	1
26282	NTRK2	0.000146116	0.473083	0.399883	0.99243	0.0275857	0.0106479	0.777914	0.302624	0.805914	1.87224e-05	0.219351	0	0	0	0	0	0	0	0	1	0	1
25385	mtss1	0.000146485	0.675313	0.272637	0.908877	0.000126251	0.596758	0.974393	0.000946929	0.847311	0.00784008	0.0563732	0	0	0	1	0	0	1	0	0	0	2
16033	TC253546	0.000146832	0.0904324	0.707445	0.976601	0.474899	0.000554263	0.458231	0.00016015	0.86386	0.84926	0.669697	0	0	0	0	1	0	1	0	0	0	2
35032	PIGY	0.000146832	0.260798	0.0303338	0.00167378	0.630986	0.418978	0.0848716	0.321328	0.426026	0.0302864	0.00374781	0	0	0	0	0	0	0	0	0	0	0
20665	VAV3	0.000146935	0.879426	0.286658	0.0162622	0.164051	0.021266	0.00570294	0.0122928	0.376296	0.882597	0.169807	0	0	0	0	0	0	0	0	0	0	0
7217	SNAPC5	0.00014719	0.374143	0.930372	0.108773	0.0105398	0.0958339	0.611535	0.202117	0.21019	0.000494964	0.893867	0	0	0	0	0	0	0	0	1	0	1
26238	ARL2BP	0.00014793	0.136213	0.764022	0.440461	0.010107	0.0537814	0.0180614	0.384547	0.42124	0.00263269	0.000996179	0	0	0	0	0	0	0	0	0	1	1
3207	WHSC1L1	0.000148648	0.910796	0.969202	0.609616	0.00499464	0.882961	0.584203	0.00461537	0.723294	0.000961723	0.00489457	0	0	0	0	0	0	0	0	1	0	1
11234	HMBOX1	0.000148648	0.0221303	0.23196	0.41375	9.29996e-05	0.247149	0.893649	0.260723	0.94354	0.00575719	0.344046	0	0	0	1	0	0	0	0	0	0	1
18124	FNDC1	0.000148821	0.720792	0.943556	0.955082	0.034677	0.554507	0.806542	4.51316e-05	0.927505	0.000996591	0.264833	0	0	0	0	0	0	1	0	1	0	2
21643	GNAI2	0.000149406	0.910796	0.554417	0.824268	0.00770631	0.200343	0.949133	0.000289846	0.657998	0.0354413	0.0252438	0	0	0	0	0	0	1	0	0	0	1
32865	LNPEP	0.000151955	0.667494	0.61906	0.0904079	0.000522611	0.998746	0.349697	0.00352182	0.509055	0.00190103	0.96913	0	0	0	1	0	0	0	0	0	0	1
28332	FKBP4	0.000152327	0.686528	0.157096	0.873946	0.000555508	0.31351	0.990504	0.00100471	0.796571	0.0393615	0.0828738	0	0	0	1	0	0	0	0	0	0	1
33005	CA778613	0.000152433	0.224514	0.453072	0.741513	0.0823847	0.00160154	0.221297	0.917016	0.996261	0.000236588	0.0802707	0	0	0	0	0	0	0	0	1	0	1
3527	PAMR1	0.00015335	0.758016	0.538056	0.849068	0.0611526	0.811875	0.996636	0.000660024	0.965515	9.41842e-05	0.0947215	0	0	0	0	0	0	1	0	1	0	2
30125	ORC4	0.000153994	0.805391	0.976587	0.992153	0.0124135	0.556006	0.923511	7.03851e-05	0.996487	0.00128779	0.131239	0	0	0	0	0	0	1	0	0	0	1
40742	TLR1	0.000154466	0.893448	0.693017	0.65312	0.00464352	0.799218	0.59607	0.00251134	0.570941	0.00711583	0.00438576	0	0	0	0	0	0	0	0	0	0	0
24625	GUCY1A3	0.000156481	0.0443618	0.000418198	0.159837	0.000246656	0.278821	0.967935	0.272682	0.883512	0.991909	0.801952	0	1	0	1	0	0	0	0	0	0	2
33222	AK237342	0.000157251	0.799951	0.061567	0.0969194	0.00213998	0.0472146	0.259205	0.000678007	0.838642	0.224154	0.969298	0	0	0	0	0	0	1	0	0	0	1
11927	NOR-1	0.000157971	0.0221871	0.0373162	0.0650279	2.39452e-05	0.656691	0.933158	0.031272	0.817105	0.00487259	0.630134	0	0	0	1	0	0	0	0	0	0	1
19535	GPD1	0.000159576	0.382867	0.163688	0.352228	0.947134	0.000196746	0.0608328	0.108696	0.94292	0.0535066	0.2803	0	0	0	0	1	0	0	0	0	0	1
22474	NDUFC1	0.00015972	0.0117935	0.978383	0.830424	0.0348844	0.000512148	0.409723	0.522924	0.886357	0.00739934	0.504452	0	0	0	0	1	0	0	0	0	0	1
14438	ITGB3	0.000159882	0.513963	0.427962	0.9115	0.108489	0.00411293	0.914978	0.000202146	0.669708	0.500105	0.196738	0	0	0	0	0	0	1	0	0	0	1
25499	CC2D1B	0.000160058	0.774678	0.0454663	0.79893	0.56831	4.66187e-05	0.646973	0.0892147	0.732605	0.0615658	0.976377	0	0	0	0	1	0	0	0	0	0	1
4764	TIGD4	0.000160464	0.496684	0.00479082	0.019353	0.0862357	0.0371468	0.185039	0.505704	0.82834	0.21556	0.25871	0	0	0	0	0	0	0	0	0	0	0
21225	PRRC2B	0.000162031	0.244412	0.588885	0.573894	0.000639764	0.444455	0.992143	0.0386672	0.898877	0.00123906	0.317861	0	0	0	1	0	0	0	0	0	0	1
13461	TC250085	0.000162758	0.682788	0.843622	0.742329	0.00403898	0.713044	0.496786	0.0064704	0.719686	0.000759662	0.00525201	0	0	0	0	0	0	0	0	1	0	1
8255	BAP18	0.00016418	0.943052	0.187981	0.418351	0.00345192	0.0572826	0.56238	8.80602e-05	0.968933	0.0668883	0.589266	0	0	0	0	0	0	1	0	0	0	1
3318	AK232497	0.000164341	0.167631	0.00051585	0.0219618	0.0933375	0.0727412	0.450436	0.975894	0.94149	0.0417137	0.25299	0	1	0	0	0	0	0	0	0	0	1
43290	CYP51	0.000165711	0.0581618	0.00497943	0.379413	4.58232e-05	0.587386	0.962877	0.0357115	0.831431	0.168813	0.243295	0	0	0	1	0	0	0	0	0	0	1
1099	AK239973	0.000165711	0.910796	0.0404432	0.643099	0.00365949	0.00445217	0.625335	0.000238665	0.851327	0.611382	0.51886	0	0	0	0	0	0	1	0	0	0	1
10909	PSMB4	0.000166035	0.0624291	0.000279248	0.0031248	0.00601269	0.118299	0.340909	0.639543	0.826205	0.387373	0.36926	0	1	0	0	0	0	0	0	0	0	1
1793	DCN	0.000169982	0.882866	0.626153	0.991132	0.0228658	0.753234	0.956824	0.00141049	0.860725	9.11765e-05	0.215747	0	0	0	0	0	0	0	0	1	0	1
30055	AK239593	0.000170876	0.219887	0.977565	0.895438	0.00745828	0.0368556	0.366431	0.272765	0.9261	0.000292269	0.0343416	0	0	0	0	0	0	0	0	1	0	1
12113	TC273083	0.00017093	0.592382	0.127826	0.472506	0.469766	6.82386e-05	0.179183	0.0140858	0.988814	0.299875	0.769521	0	0	0	0	1	0	0	0	0	0	1
44641	DDX3X	0.000171536	0.110929	0.39826	0.708943	0.363069	0.307078	0.832741	1.60501e-05	0.990889	0.00197178	0.187919	0	0	0	0	0	0	1	0	0	0	1
35744	NCKAP1L	0.000172774	0.991162	0.910441	0.522345	0.00880429	0.847654	0.610611	0.00344417	0.754345	0.000465761	0.00466848	0	0	0	0	0	0	0	0	1	0	1
17165	CDK5RAP1	0.000174268	0.370122	0.0143808	0.0727747	0.831397	0.217093	0.484544	0.0736963	0.887572	0.000269113	0.0199888	0	0	0	0	0	0	0	0	1	0	1
40781	MARCKS	0.000174735	0.894578	0.379755	0.708943	0.00108495	0.390366	0.882324	0.000461447	0.989583	0.0146633	0.26452	0	0	0	0	0	0	1	0	0	0	1
5079	NQO1	0.000179249	0.711596	0.0472595	0.415393	0.02353	0.000935462	0.246244	0.000440782	0.96626	0.980364	0.931912	0	0	0	0	1	0	1	0	0	0	2
28345	SULF2	0.000181462	0.924413	0.861718	0.570046	0.006946	0.548103	0.542746	9.24815e-05	0.794926	0.00175881	0.56799	0	0	0	0	0	0	1	0	0	0	1
7850	DTD1	0.000185664	0.00894568	0.0844041	0.00932357	0.472853	0.35013	0.744708	0.0146623	0.528192	0.200591	0.0311543	0	0	0	0	0	0	0	0	0	0	0
38768	LRRC33	0.000186187	0.897463	0.0260637	0.275376	0.0122932	0.00332748	0.448997	0.00153617	0.982033	0.806325	0.900251	0	0	0	0	0	0	0	0	0	0	0
2539	UBTF	0.000188044	0.374143	0.0115773	0.0766253	7.85739e-05	0.18412	0.496786	0.00607599	0.906948	0.249923	0.900251	0	0	0	1	0	0	0	0	0	0	1
18139	DB804450	0.000188753	0.835195	0.0368451	0.155609	0.674795	0.000335644	0.0860038	0.252187	0.936886	0.0300576	0.221144	0	0	0	0	1	0	0	0	0	0	1
19354	CAMK1D	0.000190397	0.97263	0.273358	0.897439	0.00228814	0.100769	0.924078	0.000192345	0.84781	0.0681015	0.158368	0	0	0	0	0	0	1	0	0	0	1
15252	PARP1	0.000191208	0.0138751	0.980678	0.48608	0.0554783	0.000311666	0.789048	0.429301	0.638153	0.00886933	0.927992	0	0	0	0	1	0	0	0	0	0	1
28090	OLA1	0.000191208	0.0357939	0.810737	0.950729	0.419451	4.38154e-05	0.343749	0.062792	0.865216	0.0688505	0.807481	0	0	0	0	1	0	0	0	0	0	1
18761	PIP4K2A	0.000191208	0.252679	0.866032	0.984946	0.164927	0.163407	0.57745	7.73023e-05	0.934302	0.0196963	0.50025	0	0	0	0	0	0	1	0	0	0	1
1509	WDYHV1	0.000191208	0.837911	0.0155751	0.589514	0.00170445	0.0171282	0.832417	0.00218716	0.805221	0.666808	0.458122	0	0	0	0	0	0	0	0	0	0	0
2684	P4HA1	0.000192483	0.693819	0.0173787	0.00720348	0.559764	0.0435842	0.0516594	0.986891	0.652573	0.0265372	0.0185706	0	0	0	0	0	0	0	0	0	0	0
32792	SUB1	0.000192616	0.880675	0.051018	0.849068	0.00351286	0.0323411	0.973136	0.00159728	0.708786	0.435925	0.202359	0	0	0	0	0	0	0	0	0	0	0
34841	ADAMTS15	0.000192972	0.0872532	0.628132	0.996384	0.966445	3.59379e-05	0.355738	0.00657474	0.8643	0.326999	0.979478	0	0	0	0	1	0	0	0	0	0	1
20422	EFR3A	0.000193628	0.0436422	0.751539	0.846837	0.000486035	0.0513785	0.611535	0.403531	0.982956	0.000664535	0.136206	0	0	0	1	0	0	0	0	1	0	2
39962	KLF3	0.000193628	0.279381	0.0762973	0.967889	0.48792	4.36536e-05	0.746748	0.00712966	0.533828	0.178268	0.675977	0	0	0	0	1	0	0	0	0	0	1
4519	MTRF1	0.0001978	0.0128457	0.196341	0.426003	0.000205357	0.139341	0.811417	0.391133	0.969077	0.00722833	0.319535	0	0	0	1	0	0	0	0	0	0	1
19032	LUC7L2	0.000197817	0.270776	0.488958	0.80709	0.075533	0.00257917	0.310271	0.817876	0.979071	0.000224053	0.101519	0	0	0	0	0	0	0	0	1	0	1
22476	C17H20orf108	0.000199418	0.784576	0.987172	0.0267086	0.00770631	0.653897	0.110924	0.0251912	0.113766	0.00154225	0.604549	0	0	0	0	0	0	0	0	0	0	0
19255	TEX11	0.000199474	0.590774	0.0632177	0.602393	0.638157	6.45944e-05	0.302557	0.0628534	0.885103	0.0683214	0.77292	0	0	0	0	1	0	0	0	0	0	1
4195	MYBPHL	0.000200103	0.00192235	0.827236	0.862603	0.0390436	0.000737915	0.235732	0.190513	0.968933	0.0459466	0.514915	0	0	0	0	1	0	0	0	0	0	1
23230	MAPRE3	0.000200733	0.558329	0.0233516	0.259057	0.734971	0.0946788	0.706215	0.0909559	0.986112	0.000126759	0.0797276	0	0	0	0	0	0	0	0	1	0	1
21548	KCMF1	0.000200733	0.25596	0.317674	0.599704	0.437613	0.000188336	0.121732	0.547077	0.989435	0.00342465	0.16398	0	0	0	0	1	0	0	0	0	0	1
5868	ATP7A	0.00020107	0.929063	0.942772	0.981225	0.00660176	0.955589	0.992872	0.000325104	0.992639	0.000263451	0.0858055	0	0	0	0	0	0	1	0	1	0	2
23693	SRSF2	0.000201134	0.0581618	0.4762	0.103779	0.000133838	0.219497	0.890168	0.178247	0.57551	0.00159469	0.878993	0	0	0	1	0	0	0	0	0	0	1
19704	ETS1	0.000201134	0.595881	0.113813	0.777303	0.333478	7.53877e-05	0.465884	0.00568161	0.828042	0.442152	0.946051	0	0	0	0	1	0	0	0	0	0	1
20745	CD74	0.000204902	0.587723	0.0222142	0.143087	0.00048668	0.0649885	0.511491	0.00129184	0.957598	0.25279	0.804827	0	0	0	1	0	0	0	0	0	0	1
43959	TC276920	0.000206288	0.797445	0.0409716	0.974528	0.552029	0.000857928	0.894692	0.912952	0.558627	0.000123637	0.730108	0	0	0	0	1	0	0	0	1	0	2
18212	STARD8	0.000206904	0.0949756	0.49531	0.872469	0.289696	0.000437122	0.697336	0.000103222	0.696222	0.899305	0.368627	0	0	0	0	1	0	1	0	0	0	2
13854	LOC780407	0.000208323	0.00106379	0.087652	0.102916	0.642071	0.123366	0.962417	0.000644033	0.810841	0.111483	0.154288	0	0	0	0	0	0	1	0	0	0	1
9137	HSP70.2	0.00020873	0.0150201	0.180116	0.406379	7.68513e-05	0.249686	0.868279	0.308921	0.962073	0.00831942	0.337384	0	0	0	1	0	0	0	0	0	0	1
9625	TPM3	0.000208772	0.746503	0.212128	0.893244	0.0769715	0.00129238	0.735914	0.000254382	0.800138	0.666718	0.481543	0	0	0	0	0	0	1	0	0	0	1
42364	MICU1	0.000208772	0.496313	0.912826	0.989552	0.0020804	0.179677	0.826906	0.0406527	0.959206	5.86451e-05	0.084608	0	0	0	0	0	0	0	0	1	0	1
34958	MLLT6	0.000210449	0.399874	0.765797	0.849068	0.0238692	0.0202368	0.439267	0.239843	0.982033	0.000105473	0.0487783	0	0	0	0	0	0	0	0	1	0	1
12008	TMEM222	0.000215547	0.0802482	0.00177964	0.105954	0.000132254	0.309128	0.871918	0.0885378	0.979071	0.613693	0.815918	0	0	0	1	0	0	0	0	0	0	1
10876	PPP1R3G	0.000215665	0.976549	0.638845	0.137687	0.0844086	0.553422	0.200934	0.03465	0.560005	0.00139252	0.00131231	0	0	0	0	0	0	0	0	0	0	0
32011	MEIS1	0.000216964	0.0508714	0.481919	0.133948	0.000483584	0.06962	0.961537	0.161577	0.613402	0.000499642	0.768963	0	0	0	1	0	0	0	0	1	0	2
19338	DNM1L	0.000216964	0.037068	0.121486	0.105964	0.748293	0.603948	0.929026	0.000639308	0.792126	0.00550019	0.0253648	0	0	0	0	0	0	1	0	0	0	1
19809	YWHAH	0.000217038	0.000367999	0.1594	0.470672	0.00218808	0.00365858	0.383509	0.499012	0.996374	0.0653261	0.491376	1	0	0	0	0	0	0	0	0	0	1
17255	U6	0.000218693	0.581089	0.854688	0.987512	0.000773089	0.62764	0.829141	0.0100154	0.936886	0.00036704	0.0407174	0	0	0	1	0	0	0	0	1	0	2
38468	ME1	0.000219455	0.500579	0.733845	0.965474	0.0741909	0.631533	0.700622	8.29417e-05	0.851694	0.000961723	0.388273	0	0	0	0	0	0	1	0	1	0	2
28083	GOPC	0.00022033	0.707292	0.0434099	0.0766253	0.00177983	0.0733329	0.27583	0.00285926	0.833534	0.337145	0.985406	0	0	0	0	0	0	0	0	0	0	0
3584	C20orf67	0.000220732	0.479227	0.965776	0.889723	0.0498654	0.175534	0.925017	5.9542e-05	0.897253	0.014736	0.11573	0	0	0	0	0	0	1	0	0	0	1
15587	AK236317	0.000222891	0.130833	0.399041	0.937405	0.961223	3.47232e-05	0.610845	0.0116731	0.693066	0.194908	0.893407	0	0	0	0	1	0	0	0	0	0	1
27167	CAST	0.000222906	0.308954	0.588885	0.802422	0.0333345	0.010438	0.358421	0.545581	0.995799	0.000153207	0.0647429	0	0	0	0	0	0	0	0	1	0	1
20265	TC296671	0.00022336	0.554652	0.834572	0.897439	0.0155586	0.0873423	0.632351	0.0754649	0.986112	0.000102841	0.0513842	0	0	0	0	0	0	0	0	1	0	1
36146	TC279376	0.000223564	0.610977	0.299241	0.633582	0.149398	0.693558	0.953969	0.00300259	0.996464	0.000163939	0.0705703	0	0	0	0	0	0	0	0	1	0	1
11124	ITGA1	0.000223744	0.118401	0.602169	0.967081	0.936898	3.5861e-05	0.490102	0.0129352	0.79951	0.252376	0.979478	0	0	0	0	1	0	0	0	0	0	1
4838	BLOC1S2	0.000224267	0.18751	0.00445499	0.510896	0.826024	0.221081	0.993907	0.112836	0.776735	0.000913233	0.542188	0	0	0	0	0	0	0	0	1	0	1
2050	ABI3BP	0.000225789	0.597118	0.966944	0.903746	0.0165426	0.328063	0.95956	6.58977e-05	0.909765	0.00468842	0.0802707	0	0	0	0	0	0	1	0	0	0	1
4081	MYOZ2	0.000225887	0.931347	0.969015	0.881469	0.00340743	0.927781	0.880492	0.000307041	0.897362	0.000261773	0.226091	0	0	0	0	0	0	1	0	1	0	2
38813	TTC14	0.000227337	0.504774	0.875584	0.394219	0.0986058	0.433214	0.861952	0.000254382	0.669939	0.00740843	0.0104478	0	0	0	0	0	0	1	0	0	0	1
33303	TC259524	0.000227762	0.0233827	0.786219	0.202564	0.140652	0.000386488	0.998446	0.295045	0.252891	0.012279	0.677146	0	0	0	0	1	0	0	0	0	0	1
37716	SIRT2	0.000229249	0.958395	0.0507706	0.75243	0.567691	0.00309572	0.77195	0.572559	0.786957	0.000104684	0.360388	0	0	0	0	0	0	0	0	1	0	1
4241	TC270905	0.000229397	0.985995	0.109259	0.0137395	0.915974	0.0345832	0.0180614	0.946446	0.541692	0.0345666	0.00828047	0	0	0	0	0	0	0	0	0	0	0
10620	TOR3A	0.000229466	0.05535	0.823285	0.392855	0.000585282	0.0446792	0.973818	0.374254	0.711404	0.00040473	0.601441	0	0	0	1	0	0	0	0	1	0	2
23193	PSEN1	0.000230734	0.00578668	0.542389	0.49342	0.00282462	0.00394896	0.670529	0.96305	0.865521	0.00573071	0.520467	0	0	0	0	0	0	0	0	0	0	0
7546	AK234942	0.000230787	0.742327	0.170876	0.955772	0.0322743	0.00357054	0.832417	0.000246785	0.737215	0.589452	0.294265	0	0	0	0	0	0	1	0	0	0	1
25520	ZBTB4	0.000231841	0.975945	0.996441	0.65312	0.00371162	0.953774	0.75801	0.00111073	0.768602	0.000348901	0.4899	0	0	0	0	0	0	0	0	1	0	1
37709	CXCL14	0.000231841	0.0675852	6.23218e-05	0.0369738	0.0131066	0.0836457	0.700622	0.891924	0.969804	0.090448	0.608019	0	1	0	0	0	0	0	0	0	0	1
23652	RUFY3	0.000231841	0.35496	0.614149	0.794815	0.000411676	0.625982	0.950064	0.0183422	0.989435	0.00107664	0.142106	0	0	0	1	0	0	0	0	0	0	1
7731	Phf2	0.000231841	0.482279	0.903369	0.961481	0.00959117	0.135828	0.700622	0.117419	0.999939	0.000314674	0.084582	0	0	0	0	0	0	0	0	1	0	1
18645	RPL23	0.000231841	0.00830119	0.00187411	0.0787895	0.325144	0.911741	0.992143	0.0226591	0.999097	0.0105165	0.272974	0	0	0	0	0	0	0	0	0	0	0
36722	SEPP1	0.000233666	0.709963	0.596907	0.959255	0.0679251	0.943882	0.825758	0.00103534	0.799925	0.000366148	0.408718	0	0	0	0	0	0	0	0	1	0	1
44486	MMAB	0.000234518	0.823066	0.0491111	0.494552	0.330036	0.0787796	0.767614	0.080625	0.934302	3.00171e-05	0.0893605	0	0	0	0	0	0	0	0	1	0	1
44566	BX920332	0.000234518	0.679067	0.862029	0.531201	0.0357747	0.211017	0.301471	0.112689	0.775609	0.00106148	0.00934354	0	0	0	0	0	0	0	0	0	0	0
18381	PAAF1	0.000235279	0.166776	0.383845	0.426564	0.311887	0.588412	0.995876	0.000238665	0.894946	0.00281469	0.0564594	0	0	0	0	0	0	1	0	0	0	1
26652	Ube4b	0.000235825	0.024031	0.000613717	0.00167378	0.0172984	0.479486	0.362793	0.859412	0.72278	0.243771	0.131038	0	1	0	0	0	0	0	0	0	0	1
22769	AK231953	0.000235825	0.00276487	0.53931	0.0253961	0.00701678	0.0112431	0.929206	0.589242	0.304247	0.046863	0.602668	0	0	0	0	0	0	0	0	0	0	0
37280	LRRTM3	0.000236848	0.0788703	0.79585	0.954117	0.371934	0.0395057	0.476778	2.68695e-05	0.976428	0.0564355	0.524333	0	0	0	0	0	0	1	0	0	0	1
38544	KIAA1671	0.000238131	0.132979	0.00375986	0.227937	0.814249	0.243007	0.949805	0.0500345	0.908829	0.000464998	0.244052	0	0	0	0	0	0	0	0	1	0	1
20610	HIST1H3D	0.000238229	0.00711097	0.0225708	0.00316367	0.201206	0.644143	0.627393	0.0693978	0.540556	0.23107	0.039506	0	0	0	0	0	0	0	0	0	0	0
39387	FAM125B	0.000238992	0.519501	0.000610074	0.368438	0.147919	0.00116821	0.835368	0.578129	0.719666	0.0218227	0.916399	0	1	0	0	0	0	0	0	0	0	1
4913	RCOR1	0.000239362	0.0265558	0.18046	0.154518	4.08357e-05	0.398897	0.98387	0.184484	0.798542	0.00700037	0.677747	0	0	0	1	0	0	0	0	0	0	1
39661	LUC7L2	0.000239806	0.0113729	0.0623819	0.97973	0.000614158	0.41909	0.174265	0.662196	0.558627	0.126005	0.0314595	0	0	0	1	0	0	0	0	0	0	1
39674	MEF2C	0.0002418	0.632726	0.910497	0.41707	0.0405351	0.240258	0.185538	0.170555	0.669708	0.00264207	0.0055372	0	0	0	0	0	0	0	0	0	0	0
27838	HABP4	0.000242184	0.993091	0.132498	0.472011	0.000834091	0.0610863	0.573043	0.000181742	0.999811	0.113873	0.542188	0	0	0	1	0	0	1	0	0	0	2
38064	ECHDC1	0.000242184	0.96269	0.816105	0.358922	0.00928168	0.564806	0.366431	0.000191813	0.663972	0.00300611	0.818265	0	0	0	0	0	0	1	0	0	0	1
13078	TC269543	0.000243264	0.100826	0.349591	0.117922	0.000183459	0.331886	0.879393	0.0307235	0.655712	0.000601518	0.708567	0	0	0	1	0	0	0	0	1	0	2
2129	KIAA1919	0.000243295	0.0365192	0.793946	0.996479	0.543993	6.60277e-05	0.239607	0.0339805	0.924577	0.127259	0.770656	0	0	0	0	1	0	0	0	0	0	1
38134	SLA-DQA1	0.00024374	0.5078	0.470512	0.347053	0.000279493	0.984548	0.818836	0.00407843	0.812191	0.00223141	0.535925	0	0	0	1	0	0	0	0	0	0	1
43995	PRDX6	0.000244048	0.874459	0.726325	0.802821	0.00455399	0.343302	0.951145	0.000202075	0.735169	0.00949681	0.0200691	0	0	0	0	0	0	1	0	0	0	1
22949	TC271206	0.000244144	0.336245	0.999741	0.988172	0.00151126	0.155852	0.688366	0.0793796	0.989583	0.000144774	0.0582337	0	0	0	0	0	0	0	0	1	0	1
7767	SLC16A1	0.00024536	0.305839	0.756419	0.925756	0.0185132	0.0127623	0.796773	0.33142	0.827722	9.41842e-05	0.266948	0	0	0	0	0	0	0	0	1	0	1
5034	PTPRJ	0.000245865	0.95525	0.210602	0.979357	0.00339425	0.0574924	0.974393	0.000258431	0.737215	0.140997	0.102341	0	0	0	0	0	0	1	0	0	0	1
2402	EGFR	0.000245865	0.0106412	0.109333	0.824579	0.696188	0.27479	0.394947	0.00309279	0.796571	0.101857	0.946534	0	0	0	0	0	0	0	0	0	0	0
16619	SERPINF1	0.000247379	0.834212	0.865686	0.755271	0.0122289	0.39838	0.940306	0.0134268	0.75331	0.000175792	0.461221	0	0	0	0	0	0	0	0	1	0	1
15066	NCOA2	0.000248966	0.179531	0.0023001	0.00816977	0.264022	0.124011	0.292348	0.65544	0.800138	0.0218902	0.0667062	0	0	0	0	0	0	0	0	0	0	0
19849	MAK16	0.000250513	0.912517	0.0311745	0.10265	0.915392	0.00518799	0.179751	0.928933	0.896158	0.00359691	0.074967	0	0	0	0	0	0	0	0	0	0	0
40112	CBR1	0.000253821	0.570672	0.572262	0.970867	0.0351256	0.954077	0.893649	0.000254382	0.897972	0.000161563	0.199929	0	0	0	0	0	0	1	0	1	0	2
6509	OVOL1	0.000254123	0.401779	0.00451855	0.427568	0.889414	0.088697	0.924078	0.1137	0.82834	8.02584e-05	0.260336	0	0	0	0	0	0	0	0	1	0	1
29316	ALDH5A1	0.000255718	0.51742	0.703975	0.892052	0.0189109	0.0557819	0.62604	2.48351e-05	0.987715	0.0407509	0.355632	0	0	0	0	0	0	1	0	0	0	1
27660	CN165398	0.000257004	0.842098	0.00689407	0.472107	0.570512	0.000188336	0.386984	0.235652	0.829384	0.0108018	0.659041	0	0	0	0	1	0	0	0	0	0	1
30830	PHKB	0.000257234	0.00254394	0.569749	0.56835	0.0687053	0.000219164	0.457126	0.0978841	0.898877	0.138676	0.849235	0	0	0	0	1	0	0	0	0	0	1
42	NTN4	0.000259497	0.000286025	7.69272e-05	0.0563644	0.000198711	0.975153	0.926209	0.956456	0.914675	0.973433	0.878621	1	1	0	1	0	0	0	0	0	0	3
26966	FAM105B	0.000259497	0.123219	0.000498608	0.0124587	0.112277	0.0661514	0.434461	0.861086	0.915221	0.0304294	0.196738	0	1	0	0	0	0	0	0	0	0	1
38676	SLA-DQA1	0.000261991	0.425214	0.964665	0.54198	0.144877	0.168003	0.150678	0.000145952	0.655312	0.0278481	0.98417	0	0	0	0	0	0	1	0	0	0	1
21776	ARL6IP4	0.000262012	0.192863	0.0307919	0.227937	0.799517	0.550917	0.910083	0.00715739	0.991275	0.000268593	0.0792264	0	0	0	0	0	0	0	0	1	0	1
1127	C11orf84	0.000263914	0.0388531	0.903467	0.872989	0.00602785	0.0175897	0.135651	0.888718	0.855709	0.00313366	0.0400739	0	0	0	0	0	0	0	0	0	0	0
12762	PAPOLA	0.000267551	0.306859	0.854534	0.700305	0.0012484	0.22888	0.973136	0.046428	0.863588	0.000257481	0.270192	0	0	0	0	0	0	0	0	1	0	1
30536	CA4	0.000267551	0.00687848	0.946359	0.974617	0.112646	0.00052659	0.172102	0.143097	0.996261	0.0653261	0.469807	0	0	0	0	1	0	0	0	0	0	1
30198	WDR36	0.000267657	0.948304	0.321575	0.936109	0.00136067	0.12447	0.938751	0.000131009	0.841449	0.0418975	0.118155	0	0	0	0	0	0	1	0	0	0	1
19077	U6	0.00026766	0.0600455	0.000173088	0.020819	0.0025526	0.144359	0.628416	0.593378	0.971876	0.40965	0.691988	0	1	0	0	0	0	0	0	0	0	1
6609	TAF1B	0.000268834	0.823066	0.434428	0.430981	0.14885	0.585152	0.713346	0.0127008	0.882928	0.000547568	0.0246759	0	0	0	0	0	0	0	0	1	0	1
27774	ITGA9	0.00027281	0.137328	0.0160876	0.108379	0.984001	0.562974	0.801063	0.0314248	0.936736	0.00143261	0.0656139	0	0	0	0	0	0	0	0	0	0	0
4048	PID1	0.000273765	0.902414	0.753668	0.367249	0.0189902	0.279872	0.286085	9.80159e-05	0.708178	0.00922199	0.870048	0	0	0	0	0	0	1	0	0	0	1
37498	EIF3I	0.000273765	0.675313	0.207974	0.199938	0.00148259	0.435928	0.555283	0.00443736	0.82834	0.063197	0.851639	0	0	0	0	0	0	0	0	0	0	0
24387	NARF	0.000274934	0.0724728	0.361364	0.277563	0.782644	0.384075	0.00616611	0.00272047	0.145963	0.0551821	0.301878	0	0	0	0	0	0	0	0	0	0	0
20441	TC290906	0.000275136	0.79729	0.979993	0.0692956	0.0190464	0.546764	0.201483	0.0260232	0.168243	0.00135287	0.759384	0	0	0	0	0	0	0	0	0	0	0
40307	slu7	0.000280167	0.188779	0.000969683	0.537482	0.00114049	0.044335	0.98387	0.050293	0.622908	0.983616	0.344766	0	1	0	0	0	0	0	0	0	0	1
23384	SLA	0.000284086	0.807052	0.142592	0.640671	0.00135926	0.134598	0.882793	0.000290967	0.927694	0.0563547	0.277016	0	0	0	0	0	0	1	0	0	0	1
6259	SNORA9	0.000285544	0.000286025	0.00964779	0.88595	0.00731626	0.30551	0.114359	0.230476	0.558627	0.940385	0.286616	1	0	0	0	0	0	0	0	0	0	1
35594	TC297094	0.000289266	0.983045	0.617512	0.87625	0.0122289	0.523224	0.914978	0.00362475	0.754345	3.94442e-05	0.355632	0	0	0	0	0	0	0	0	1	0	1
18065	DY406144	0.000289266	0.577681	0.0382245	0.281372	0.703529	0.000214822	0.0962336	0.119538	0.990449	0.0339805	0.351153	0	0	0	0	1	0	0	0	0	0	1
12652	SHROOM4	0.000289266	0.399874	0.716669	0.849068	0.187486	0.0103308	0.914978	0.000170801	0.750677	0.307058	0.201874	0	0	0	0	0	0	1	0	0	0	1
39534	PN-1	0.000290165	0.934392	0.210602	0.709271	0.0038659	0.0836225	0.84139	0.000178896	0.92658	0.0698108	0.303174	0	0	0	0	0	0	1	0	0	0	1
32814	IFNGR1	0.000292489	0.733956	0.19264	0.988736	0.100644	0.0116092	0.925429	0.316259	0.682855	2.50864e-05	0.433429	0	0	0	0	0	0	0	0	1	0	1
29223	GSTM5	0.000293492	0.0233827	0.0204169	0.917328	0.00129024	0.932994	0.129347	0.719323	0.282653	0.563658	0.0221978	0	0	0	0	0	0	0	0	0	0	0
29692	TC246812	0.0002952	0.970866	0.263143	0.834893	0.0621087	0.113692	0.871044	0.0443887	0.894472	2.15094e-05	0.118155	0	0	0	0	0	0	0	0	1	0	1
16658	THNSL2	0.0002952	0.936845	0.065321	0.845024	0.0462143	0.00154419	0.835265	0.00154787	0.725815	0.952124	0.473541	0	0	0	0	0	0	0	0	0	0	0
32449	btg1	0.000299961	0.147438	0.000314809	0.0766253	0.0656494	0.0446675	0.719128	0.966442	0.94149	0.0464975	0.585501	0	1	0	0	0	0	0	0	0	0	1
41304	TC295214	0.000300511	0.00024339	0.00184957	0.312991	0.00100309	0.559558	0.647949	0.542246	0.849765	0.992649	0.740163	1	0	0	0	0	0	0	0	0	0	1
9812	NRXN1	0.000300709	0.264674	0.0157399	0.168915	0.792812	0.337062	0.778437	0.0326968	0.979071	0.000232063	0.0563732	0	0	0	0	0	0	0	0	1	0	1
28584	CJ013047	0.000301756	0.628834	0.153533	0.0807453	0.38786	0.438616	0.343749	0.0373485	0.728247	0.00067139	0.00437273	0	0	0	0	0	0	0	0	1	0	1
39403	CLIC5	0.000301756	0.727648	0.791719	0.0991501	0.00277943	0.88707	0.32909	0.0100831	0.409699	0.00264961	0.96032	0	0	0	0	0	0	0	0	0	0	0
2835	OLFM1	0.000302286	0.800729	0.936141	0.82408	0.0119265	0.489974	0.984515	0.022182	0.829402	0.00058318	0.382261	0	0	0	0	0	0	0	0	1	0	1
43853	SAMD4A	0.000303268	0.289675	0.00440614	0.392045	0.876247	0.096504	0.956125	0.147287	0.819702	0.000392302	0.378951	0	0	0	0	0	0	0	0	1	0	1
3278	RAD52	0.000303392	0.825257	0.715969	0.973619	0.00163274	0.931815	0.966987	0.000688954	0.929261	0.000952574	0.0563732	0	0	0	0	0	0	1	0	1	0	2
4438	PCYOX1	0.000303392	0.0654205	0.000585404	0.386214	0.537845	0.249794	0.986759	0.112416	0.758261	0.000880723	0.582595	0	1	0	0	0	0	0	0	1	0	2
19396	CDK13	0.00030342	0.412335	0.9263	0.979009	0.000928117	0.316429	0.802256	0.0353486	0.991221	0.000221864	0.0683134	0	0	0	1	0	0	0	0	1	0	2
1789	TFRC	0.000305159	0.531497	0.636374	0.404977	0.100052	0.0280972	0.859476	0.486257	0.317683	0.000952354	0.967585	0	0	0	0	0	0	0	0	1	0	1
30003	UBE4B	0.000305306	0.840452	0.51789	0.98983	0.0578759	0.642678	0.93368	0.00117872	0.810474	5.4974e-05	0.272271	0	0	0	0	0	0	0	0	1	0	1
22844	TUBB4B	0.000305306	0.733733	0.00341388	0.345812	0.708904	0.0038452	0.68925	0.898046	0.840026	0.00121818	0.430926	0	0	0	0	0	0	0	0	0	0	0
33728	TC291436	0.000306106	0.195409	0.019919	0.721017	0.833758	0.450564	0.919742	0.0134813	0.741068	0.000253135	0.506031	0	0	0	0	0	0	0	0	1	0	1
31574	PPP3CA	0.000306106	0.816246	0.11763	0.0156032	0.945722	0.12824	0.0578522	0.5391	0.541692	0.0123434	0.00466848	0	0	0	0	0	0	0	0	0	0	0
2151	TMEM143	0.000306187	0.33913	0.878128	0.701852	0.0795605	0.0504334	0.249149	5.05673e-05	0.858199	0.0664123	0.816291	0	0	0	0	0	0	1	0	0	0	1
10116	LMOD1	0.000307008	0.00890609	0.0647324	0.491826	0.141295	0.315027	0.707479	0.112836	0.935433	0.656553	0.992013	0	0	0	0	0	0	0	0	0	0	0
31499	CCAR1	0.000308234	0.687037	0.0891625	0.132476	0.416651	0.241423	0.434245	0.0602076	0.845096	0.000247376	0.0109411	0	0	0	0	0	0	0	0	1	0	1
30193	KIF1B	0.000308234	0.120222	0.439711	0.913555	0.249189	0.417399	0.675361	8.03453e-05	0.901869	0.0030176	0.384144	0	0	0	0	0	0	1	0	0	0	1
10274	DNASE1L1	0.000308234	0.995824	0.983591	0.994797	0.012391	0.969725	0.995876	0.00195172	0.998216	0.00164402	0.141508	0	0	0	0	0	0	0	0	0	0	0
2332	TC279609	0.000309971	0.466052	0.826235	0.423743	0.00127079	0.490813	0.900681	0.0238529	0.731429	0.000623158	0.59524	0	0	0	0	0	0	0	0	1	0	1
17244	Kras	0.000312914	0.914659	0.158665	0.379711	0.000472513	0.145823	0.577418	0.00035481	0.953328	0.0627939	0.596655	0	0	0	1	0	0	1	0	0	0	2
21738	CU571095.1	0.00031343	0.0141688	0.591847	0.101841	0.0118024	0.00863268	0.991615	0.87683	0.51722	0.0215402	0.913506	0	0	0	0	0	0	0	0	0	0	0
2683	IVD	0.000315027	0.505209	0.944278	0.171835	0.180506	0.295689	0.0246569	0.00074834	0.275263	0.0359207	0.625522	0	0	0	0	0	0	1	0	0	0	1
22685	ETS1	0.000317881	0.645456	0.19889	0.657229	0.172396	0.00052659	0.377231	0.00111792	0.947319	0.983771	0.9251	0	0	0	0	1	0	0	0	0	0	1
25320	SNX6	0.000317903	0.0153279	0.265735	0.625451	0.649041	0.192687	0.723841	7.17706e-05	0.994141	0.0141265	0.301878	0	0	0	0	0	0	1	0	0	0	1
31829	DHRS7	0.000318506	0.645178	0.415073	0.965855	0.146768	0.792837	0.913801	0.000867687	0.82834	0.000135926	0.303513	0	0	0	0	0	0	1	0	1	0	2
1987	ZNF382	0.000322001	0.842114	0.974155	0.961532	0.00365949	0.752262	0.986318	0.00517789	0.976779	0.000452869	0.127801	0	0	0	0	0	0	0	0	1	0	1
34348	SYNC	0.000322538	0.119207	0.205603	0.8224	6.74774e-05	0.774806	0.786425	0.0512114	0.878733	0.0086379	0.0775502	0	0	0	1	0	0	0	0	0	0	1
27788	IFNGR1	0.00032486	0.964448	0.0357914	0.949122	0.392632	0.01734	0.986069	0.269971	0.596596	3.05651e-05	0.566228	0	0	0	0	0	0	0	0	1	0	1
37576	DCLK1	0.000328735	0.975474	0.291857	0.7881	0.00321902	0.158033	0.868279	0.000574128	0.929261	0.0738056	0.288295	0	0	0	0	0	0	1	0	0	0	1
27887	ATP1A2	0.000328964	0.129673	0.997249	0.104852	0.282118	0.039073	0.00212422	0.516953	0.264183	0.178075	0.00424085	0	0	0	0	0	0	0	0	0	0	0
22389	MAPK1	0.000329215	0.245679	0.00670014	0.807764	0.000468374	0.164766	0.877875	0.0227129	0.558627	0.480472	0.104027	0	0	0	1	0	0	0	0	0	0	1
28623	AK236266	0.000329293	0.130551	0.715969	0.35028	0.000313142	0.199115	0.984737	0.114298	0.72942	0.000519511	0.594784	0	0	0	1	0	0	0	0	1	0	2
5509	C14H10orf84	0.000329629	0.884122	0.00704627	0.102311	0.0265595	0.0046838	0.227587	0.0305496	0.968632	0.586044	0.776221	0	0	0	0	0	0	0	0	0	0	0
15188	LMO4	0.000330365	0.0480248	0.027044	0.915752	0.83595	0.981613	0.517912	0.00184582	0.610261	0.000769839	0.798406	0	0	0	0	0	0	0	0	1	0	1
6446	TC249124	0.000330365	0.0972379	0.624773	0.735729	0.249276	0.20447	0.121472	7.04763e-05	0.635971	0.0127248	0.961866	0	0	0	0	0	0	1	0	0	0	1
33990	DY429602	0.000332497	0.75327	0.286658	0.0339431	0.287543	0.00728093	0.00656563	0.0157502	0.511936	0.911311	0.170958	0	0	0	0	0	0	0	0	0	0	0
17833	KIF1B	0.000333485	0.879426	0.834572	0.698545	0.00959117	0.440044	0.882579	0.00871822	0.693066	0.000113127	0.517278	0	0	0	0	0	0	0	0	1	0	1
19955	Obsl1	0.00033382	0.52396	0.364563	0.718921	0.131609	0.00180141	0.36121	0.000246776	0.982033	0.656579	0.844446	0	0	0	0	0	0	1	0	0	0	1
43753	Rpa3	0.00033612	0.838564	0.489398	0.455079	0.000384936	0.66291	0.717666	0.000695166	0.865521	0.00420886	0.4899	0	0	0	1	0	0	1	0	0	0	2
32687	MGP	0.000336471	0.310038	0.880846	0.994797	0.115827	0.0416765	0.667253	8.57709e-05	0.962073	0.103808	0.410856	0	0	0	0	0	0	1	0	0	0	1
39411	U6	0.000338672	0.239691	0.00154378	0.147961	0.000981413	0.0429474	0.785184	0.0296525	0.923418	0.888766	0.827003	0	0	0	1	0	0	0	0	0	0	1
15817	Gm7325	0.000339408	0.12664	0.00224024	0.0946024	8.04468e-05	0.261224	0.774303	0.0514708	0.992247	0.554995	0.863439	0	0	0	1	0	0	0	0	0	0	1
7789	MPHOSPH9	0.000339578	0.00125074	0.00084219	0.120457	0.00157096	0.925763	0.925168	0.760516	0.931204	0.830567	0.954215	0	1	0	0	0	0	0	0	0	0	1
18209	TC267088	0.000341923	0.0368589	0.980678	0.452727	0.851918	0.000535851	0.882098	0.00311295	0.635719	0.829746	0.467824	0	0	0	0	1	0	0	0	0	0	1
13594	MEF2C	0.000341923	0.97263	0.469597	0.429822	0.154114	0.170446	0.458231	0.0654113	0.8643	0.000353777	0.0203649	0	0	0	0	0	0	0	0	1	0	1
6947	TC283702	0.00034208	0.276728	0.284076	0.830825	0.156109	0.93977	0.897832	0.000342313	0.906423	0.000257481	0.211547	0	0	0	0	0	0	1	0	1	0	2
14552	CH242-130J23.1	0.000346983	0.170394	0.88978	0.437868	0.2893	0.0808845	0.998484	0.000133073	0.704588	0.0686071	0.0529324	0	0	0	0	0	0	1	0	0	0	1
20125	FRMD8	0.000349658	0.0908356	0.984906	0.448643	0.260151	0.0270367	0.982885	6.81756e-05	0.652573	0.144857	0.0571202	0	0	0	0	0	0	1	0	0	0	1
36052	SPPL2A	0.000350825	0.391068	0.107103	0.635537	0.279659	0.623319	0.994336	0.00357927	0.922091	9.09487e-05	0.134665	0	0	0	0	0	0	0	0	1	0	1
29081	ZMIZ1	0.000352157	0.251051	0.671239	0.958095	0.000362331	0.430538	0.74482	0.0477535	0.939975	0.000933871	0.0591195	0	0	0	1	0	0	0	0	1	0	2
40096	CD74	0.000356544	0.581533	0.0279075	0.230768	0.000522611	0.0866678	0.672027	0.00153717	0.997105	0.224388	0.665284	0	0	0	1	0	0	0	0	0	0	1
31444	NIT1	0.000357975	0.646926	0.168956	0.507698	0.000370042	0.341967	0.87462	0.000229168	0.991589	0.0115525	0.271428	0	0	0	1	0	0	1	0	0	0	2
34705	RABEP1	0.000358393	0.91665	0.0329472	0.0325397	0.122246	0.00370891	0.0233343	0.0331809	0.75784	0.472312	0.262489	0	0	0	0	0	0	0	0	0	0	0
38400	CSE1L	0.0003586	0.256085	0.887563	0.608933	0.0946696	0.0133204	0.11289	0.84945	0.796571	0.00491808	0.0315246	0	0	0	0	0	0	0	0	0	0	0
24975	U6	0.000360314	0.823552	0.656769	0.912394	0.0353479	0.118357	0.819642	0.0280082	0.958613	4.3388e-05	0.0862243	0	0	0	0	0	0	0	0	1	0	1
16427	CUL1	0.000362308	0.850982	0.0241748	0.481114	0.000724048	0.0332742	0.734961	0.00125806	0.898877	0.433752	0.522928	0	0	0	1	0	0	0	0	0	0	1
4462	RNF217	0.000362308	0.0916851	0.0987955	0.126344	0.897489	0.88207	0.897092	0.00353386	0.840026	0.00632248	0.0517165	0	0	0	0	0	0	0	0	0	0	0
20616	EPB41L1	0.000362666	0.820359	0.0536792	0.368796	0.00331124	0.029767	0.648284	0.000691635	0.979071	0.295528	0.655053	0	0	0	0	0	0	1	0	0	0	1
23940	LRRC17	0.000362825	0.950599	0.756811	0.973298	0.00448012	0.501669	0.965263	0.000278891	0.945468	0.00531941	0.118606	0	0	0	0	0	0	1	0	0	0	1
24586	TXNIP	0.000366411	0.345767	0.318139	0.177587	0.000113364	0.97622	0.733405	0.0101996	0.761201	0.00493545	0.731865	0	0	0	1	0	0	0	0	0	0	1
8390	ZNF189	0.00036734	0.221995	0.000823571	0.899237	0.124193	0.076838	0.417271	0.986024	0.0934497	0.0405194	0.248769	0	1	0	0	0	0	0	0	0	0	1
31915	LRRC2	0.000369626	0.313785	0.0294798	0.0866339	0.00032307	0.277206	0.59305	0.00270413	0.877508	0.08794	0.827003	0	0	0	1	0	0	0	0	0	0	1
28817	MARCH7	0.000371821	0.496684	0.658782	0.059268	0.071059	0.0520264	0.362793	0.502778	0.0749616	0.00131907	0.458532	0	0	0	0	0	0	0	0	0	0	0
22690	MUL1	0.000375324	0.968049	0.919176	0.926088	0.0038659	0.818232	0.973484	0.00175407	0.905626	0.000159872	0.187309	0	0	0	0	0	0	0	0	1	0	1
1393	SGMS1	0.000376511	0.455868	0.00519516	0.526878	0.000890808	0.0474248	0.957772	0.0125231	0.768602	0.734357	0.408497	0	0	0	1	0	0	0	0	0	0	1
28696	ZNF250	0.000376511	0.224735	0.0747736	0.917328	0.000100305	0.767275	0.782574	0.0232207	0.711404	0.0571598	0.048216	0	0	0	1	0	0	0	0	0	0	1
41766	AK233135	0.000376511	0.998322	0.75183	0.886177	0.0193101	0.625447	0.933158	0.00466973	0.797341	0.000173643	0.358473	0	0	0	0	0	0	0	0	1	0	1
6233	C4orf34	0.0003777	0.77265	0.622945	0.313777	0.0201029	0.1559	0.628133	0.0647496	0.266043	9.77027e-05	0.991487	0	0	0	0	0	0	0	0	1	0	1
13912	FHIT	0.000378722	0.853386	0.970436	0.8224	0.0137163	0.776988	0.751963	0.000427921	0.853324	0.00142712	0.416824	0	0	0	0	0	0	1	0	0	0	1
17549	FRMD8	0.000378722	0.671858	0.541272	0.864957	0.0444247	0.0360919	0.991158	0.133392	0.686861	5.45833e-05	0.476745	0	0	0	0	0	0	0	0	1	0	1
27223	CRIM1	0.000378741	0.959241	0.37948	0.955577	0.10179	0.216307	0.991615	0.0171896	0.82834	5.86451e-05	0.241642	0	0	0	0	0	0	0	0	1	0	1
33930	GRPEL1	0.000378741	0.991697	0.163039	0.785564	0.258549	0.0313609	0.847628	0.104732	0.858605	3.94442e-05	0.192466	0	0	0	0	0	0	0	0	1	0	1
3598	setmar	0.000379089	0.374143	0.921899	0.0249801	0.472471	0.113692	0.288991	0.0127386	0.0857001	0.523982	0.00128281	0	0	0	0	0	0	0	0	0	0	0
18994	FAM185A	0.00037919	0.111807	0.792202	0.893318	0.452625	0.0345832	0.625335	3.14959e-05	0.993283	0.061438	0.464584	0	0	0	0	0	0	1	0	0	0	1
16842	MPC2	0.000381066	0.845565	0.841537	0.983808	0.0149962	0.345765	0.962417	0.00983111	0.920423	9.74835e-05	0.145919	0	0	0	0	0	0	0	0	1	0	1
9468	PLCL2	0.000387263	0.205373	0.349591	0.970867	0.934993	4.18603e-05	0.458231	0.0511556	0.797341	0.0803107	0.922436	0	0	0	0	1	0	0	0	0	0	1
5835	TMX3	0.00038753	0.00639189	0.0122084	0.0368325	7.64431e-05	0.776447	0.924078	0.540509	0.82834	0.233499	0.984547	0	0	0	1	0	0	0	0	0	0	1
43805	TC247875	0.000387765	0.299652	0.981473	0.929483	0.0479978	0.14628	0.534584	3.0126e-05	0.936736	0.0123074	0.445855	0	0	0	0	0	0	1	0	0	0	1
8882	ITM2B	0.000387765	0.119286	0.704055	0.0426903	0.001097	0.187718	0.643135	0.258483	0.30048	0.00252949	0.884275	0	0	0	0	0	0	0	0	0	0	0
4853	ST6GALNAC2	0.000387765	0.00393516	0.00219839	0.00605128	0.00834868	0.93601	0.796723	0.647234	0.783666	0.696173	0.431783	0	0	0	0	0	0	0	0	0	0	0
17116	VEGFA	0.000389041	0.107127	0.607923	0.647221	0.000480954	0.13265	0.879848	0.0880749	0.922149	0.000345051	0.203537	0	0	0	1	0	0	0	0	1	0	2
9669	UBE2C	0.000389041	0.552264	0.0556941	0.727087	0.00136067	0.221799	0.994102	0.0108339	0.810841	0.27513	0.264632	0	0	0	0	0	0	0	0	0	0	0
24458	TC263509	0.000389224	0.958379	0.807791	0.019546	0.278249	0.785831	0.0146529	0.10617	0.0270657	0.0313257	0.113913	0	0	0	0	0	0	0	0	0	0	0
35404	PPP1CB	0.00038982	0.852878	0.832265	0.727825	0.0611526	0.971476	0.914978	0.00150398	0.88689	0.00146238	0.0440108	0	0	0	0	0	0	0	0	0	0	0
21550	AIMP1	0.000392796	0.903742	0.734879	0.62471	0.0426416	0.824823	0.567662	0.00157685	0.565092	0.000275023	0.771539	0	0	0	0	0	0	0	0	1	0	1
38299	C7H15orf24	0.000392931	0.952904	0.0248048	0.83059	0.846188	0.00303963	0.924078	0.687652	0.648639	0.000259373	0.660703	0	0	0	0	0	0	0	0	1	0	1
43619	ADAMTS8	0.000395386	0.0256142	0.00292203	0.00336222	0.0396977	0.719091	0.474535	0.688255	0.711404	0.319166	0.15762	0	0	0	0	0	0	0	0	0	0	0
42958	TC263510	0.000396759	0.013241	0.00151804	0.227919	0.000293067	0.75897	0.965376	0.553581	0.882928	0.817887	0.683502	0	0	0	1	0	0	0	0	0	0	1
9593	FARS2	0.000396942	0.973319	0.0158015	0.0358143	0.335608	0.00324107	0.0387689	0.234145	0.810841	0.0870381	0.134778	0	0	0	0	0	0	0	0	0	0	0
24249	TPM3	0.000397501	0.760872	0.21157	0.974182	0.124103	0.00177515	0.94357	0.00119573	0.616072	0.873389	0.28566	0	0	0	0	0	0	0	0	0	0	0
30284	BLCAP	0.000400203	0.512521	0.990557	0.91939	0.00379118	0.233442	0.913598	0.0344412	0.931204	0.000160228	0.148396	0	0	0	0	0	0	0	0	1	0	1
17006	DBN1	0.000401253	0.824308	0.538056	0.386626	0.00251042	0.686791	0.667253	0.000526703	0.810841	0.00377939	0.608201	0	0	0	0	0	0	1	0	0	0	1
27943	EW595075	0.000401739	0.909395	0.116085	0.965474	0.212542	0.0165812	0.994886	0.296187	0.558627	4.33723e-05	0.651798	0	0	0	0	0	0	0	0	1	0	1
41313	TNIP1	0.000402376	0.971443	0.650881	0.986371	0.0211094	0.574207	0.998962	0.00511446	0.898715	0.000110102	0.176982	0	0	0	0	0	0	0	0	1	0	1
17314	PDK3	0.000404151	0.277035	0.000388113	0.152581	0.00944306	0.0190112	0.754124	0.258999	0.866356	0.306671	0.965284	0	1	0	0	0	0	0	0	0	0	1
27255	DHX36	0.000404766	0.590774	0.211525	0.325334	0.255757	0.587386	0.746748	0.0112881	0.902714	0.000345173	0.0253035	0	0	0	0	0	0	0	0	1	0	1
7614	COX8H	0.000404963	0.128653	0.888862	0.550742	0.00265728	0.0422974	0.956369	0.253337	0.77183	0.000339045	0.478069	0	0	0	0	0	0	0	0	1	0	1
2336	RBMS1	0.000405011	0.892951	0.707445	0.676313	0.0625462	0.796492	0.852191	0.000968154	0.906423	0.000176867	0.0281985	0	0	0	0	0	0	1	0	1	0	2
8232	ECD	0.000407228	0.00589782	0.000906356	0.0168225	0.00159983	0.846025	0.860862	0.998436	0.904783	0.829999	0.747234	0	1	0	0	0	0	0	0	0	0	1
4174	FTL	0.000410991	0.660655	0.32122	0.00746464	0.00245241	0.681876	0.0599642	0.0178698	0.269102	0.065493	0.510564	0	0	0	0	0	0	0	0	0	0	0
22847	TC289374	0.000419328	0.0011396	0.0869349	0.368438	0.664699	0.12991	0.717373	0.000607496	0.987715	0.100344	0.481774	0	0	0	0	0	0	1	0	0	0	1
28338	FBN1	0.000419467	0.387324	0.5334	0.873613	0.111732	0.781963	0.910583	0.000300775	0.953389	0.000966487	0.197088	0	0	0	0	0	0	1	0	1	0	2
11536	BMP4	0.000419962	0.310517	0.726109	0.867593	0.000394905	0.451294	0.887763	0.0342821	0.993591	0.000633016	0.113705	0	0	0	1	0	0	0	0	1	0	2
7761	ZFP62	0.000421008	0.0519118	0.924814	0.171446	0.0193915	0.00406389	0.979865	0.968578	0.409699	0.00316646	0.959392	0	0	0	0	0	0	0	0	0	0	0
32386	C17H8orf40	0.000424153	0.000220587	0.00148314	0.334239	0.0142906	0.600498	0.632356	0.129332	0.829384	0.406937	0.956249	1	0	0	0	0	0	0	0	0	0	1
18830	SMAP2	0.000424989	0.718445	0.539517	0.598107	0.000329518	0.883907	0.893649	0.00176086	0.920051	0.00242173	0.326611	0	0	0	1	0	0	0	0	0	0	1
17162	TMSB15A	0.000425123	0.13452	0.027044	0.155179	4.12672e-05	0.698419	0.860862	0.0296625	0.943086	0.0932536	0.677534	0	0	0	1	0	0	0	0	0	0	1
8605	CK467614	0.000426509	0.0679921	0.00925932	0.00117408	0.00349284	0.6955	0.179751	0.618646	0.498245	0.945391	0.202127	0	0	0	0	0	0	0	0	0	0	0
10104	ABCA5	0.000426509	0.362186	0.00173838	0.0915085	0.00608208	0.0172008	0.566666	0.0675185	0.983912	0.772635	0.958555	0	0	0	0	0	0	0	0	0	0	0
8281	EPB41L1	0.0004304	0.764806	0.0475287	0.426003	0.0017023	0.0473523	0.746748	0.000951522	0.943086	0.262402	0.535925	0	0	0	0	0	0	1	0	0	0	1
13970	KAT6B	0.000433127	0.479227	0.767028	0.698545	0.160543	0.557257	0.997738	0.00056405	0.898715	0.00738563	0.0893851	0	0	0	0	0	0	1	0	0	0	1
1884	FAM53B	0.000433268	0.26243	0.671239	0.978531	0.000583778	0.449278	0.610611	0.0625068	0.863282	0.00159976	0.0319412	0	0	0	1	0	0	0	0	0	0	1
8577	ACVR1B	0.000433607	0.910796	0.946359	0.903519	0.0309893	0.682114	0.987212	0.00125828	0.893603	0.00752993	0.0871837	0	0	0	0	0	0	0	0	0	0	0
4680	SLA-DQA1	0.000434065	0.556917	0.199368	0.545139	0.000408232	0.579317	0.933158	0.0025889	0.992247	0.0225428	0.315733	0	0	0	1	0	0	0	0	0	0	1
11967	BW985012	0.000434201	0.869282	0.010597	0.847995	0.896054	0.0004355	0.796773	0.609064	0.599984	0.00204318	0.872914	0	0	0	0	1	0	0	0	0	0	1
17511	PCBP2	0.000434201	0.958395	0.0135432	0.910813	0.00695851	0.00617756	0.968615	0.0040766	0.558627	0.998866	0.254081	0	0	0	0	0	0	0	0	0	0	0
14131	GSN	0.00043518	0.936412	0.482736	0.560826	0.00273584	0.37261	0.717666	0.000212151	0.924702	0.0091419	0.4451	0	0	0	0	0	0	1	0	0	0	1
6324	PPP1R3B	0.00043518	0.318817	0.397351	0.059268	0.00107353	0.795488	0.481551	0.0149623	0.51722	0.00379622	0.988212	0	0	0	0	0	0	0	0	0	0	0
17603	SS18L2	0.000436975	0.985569	0.63254	0.573393	0.0643368	0.457733	0.676537	0.0111162	0.883512	0.000252496	0.0199888	0	0	0	0	0	0	0	0	1	0	1
15682	CD9	0.000437091	0.0134802	0.26718	0.325726	0.967824	0.067592	0.891645	0.000172713	0.88188	0.0840183	0.239355	0	0	0	0	0	0	1	0	0	0	1
10849	RRM2B	0.000439935	0.00753731	0.00060549	0.178515	0.180506	0.72614	0.956296	0.0682672	0.858199	0.0141265	0.639919	0	1	0	0	0	0	0	0	0	0	1
33841	HTRA1	0.000443595	0.758016	0.913597	0.827024	0.00110468	0.762765	0.992143	0.00438735	0.91964	0.000318047	0.200761	0	0	0	0	0	0	0	0	1	0	1
32529	AK237119	0.000444501	0.212287	0.695373	0.630043	0.232295	0.000718286	0.0948062	0.798389	0.886069	0.00531777	0.0827949	0	0	0	0	1	0	0	0	0	0	1
14314	ZNF541	0.000444501	0.723783	0.439548	0.992372	0.00228814	0.73361	0.910686	0.00412285	0.806567	0.0158361	0.0576158	0	0	0	0	0	0	0	0	0	0	0
23834	RBM9	0.000445754	0.178023	0.172311	0.0860836	0.000455685	0.939752	0.713346	0.0621199	0.731429	0.0345317	0.935889	0	0	0	1	0	0	0	0	0	0	1
12016	TC289207	0.000453341	0.153359	0.979854	0.973619	0.109055	0.0424828	0.466401	2.57704e-05	0.985652	0.057043	0.496548	0	0	0	0	0	0	1	0	0	0	1
39297	HSPH1	0.000454466	0.118868	0.574347	0.343365	0.000469842	0.209724	0.993667	0.0986764	0.776735	0.000876205	0.539774	0	0	0	1	0	0	0	0	1	0	2
36872	TC244605	0.000455061	0.0109046	0.00411561	0.0843224	0.39618	0.978278	0.987596	0.018383	0.982033	0.0132964	0.246233	0	0	0	0	0	0	0	0	0	0	0
35301	CS	0.000457894	0.0779944	0.534082	0.461555	0.601914	0.179464	0.95956	0.000395555	0.858605	0.0498098	0.148151	0	0	0	0	0	0	1	0	0	0	1
17853	EFHD1	0.000460949	0.564973	0.00466275	0.0113912	0.0078481	0.039174	0.11289	0.0828809	0.782031	0.774885	0.446532	0	0	0	0	0	0	0	0	0	0	0
18106	GOLIM4	0.000462195	0.041234	0.00935209	0.309921	0.000108224	0.837307	0.986759	0.186713	0.928827	0.290168	0.506582	0	0	0	1	0	0	0	0	0	0	1
27509	PPP1R35	0.000464475	0.567124	0.0160008	0.4558	0.883699	0.0456826	0.877875	0.149571	0.858861	0.000160228	0.263663	0	0	0	0	0	0	0	0	1	0	1
13756	C15orf40	0.000465969	0.740686	0.991529	0.846754	0.0417372	0.477058	0.999504	0.000112062	0.886357	0.00323159	0.0647123	0	0	0	0	0	0	1	0	0	0	1
40160	GNA12	0.000466554	0.345181	0.874234	0.994797	0.00516703	0.0745409	0.723894	0.170741	0.950993	0.00013989	0.118606	0	0	0	0	0	0	0	0	1	0	1
31918	AFAP1	0.000467571	0.535784	0.0258322	0.911604	0.0020896	0.118299	0.928084	0.0163821	0.572306	0.531145	0.118606	0	0	0	0	0	0	0	0	0	0	0
6084	NAV1	0.000467846	0.367181	0.697872	0.829751	0.253498	0.00356503	0.366431	0.000143264	0.989435	0.419295	0.828773	0	0	0	0	0	0	1	0	0	0	1
11647	ACP1	0.000471224	0.000700559	0.426321	0.854663	0.0180824	0.0069563	0.179751	0.198679	0.936886	0.178739	0.433429	1	0	0	0	0	0	0	0	0	0	1
9963	TC240353	0.000471224	0.482059	0.0380126	0.865455	0.000726055	0.231259	0.946218	0.0119383	0.677528	0.284095	0.117363	0	0	0	1	0	0	0	0	0	0	1
26642	TMEM5	0.000471696	0.00750302	0.000252581	0.177786	0.00639941	0.581214	0.965435	0.821448	0.82834	0.308674	0.989683	0	1	0	0	0	0	0	0	0	0	1
10935	NT5C2	0.000472379	0.718445	0.925503	0.933597	0.00294148	0.629963	0.964337	0.00474467	0.979071	0.000252496	0.109013	0	0	0	0	0	0	0	0	1	0	1
26369	CCDC93	0.000472617	0.240716	0.131013	0.0874093	0.000266467	0.89686	0.670529	0.0091454	0.758261	0.0150861	0.839671	0	0	0	1	0	0	0	0	0	0	1
5058	PTCH1	0.000476369	0.0580599	0.403379	0.711922	0.885344	0.17407	0.742502	0.000934106	0.991221	0.0840099	0.532468	0	0	0	0	0	0	1	0	0	0	1
26351	ITGA6	0.000476558	0.173221	0.000227825	0.44911	0.00513534	0.0354522	0.99791	0.332349	0.635971	0.334757	0.713969	0	1	0	0	0	0	0	0	0	0	1
30846	TC242428	0.000483231	0.0160314	0.148706	0.889723	0.00127842	0.353348	0.0983401	0.817921	0.518816	0.133432	0.0198322	0	0	0	0	0	0	0	0	0	0	0
40070	TC273858	0.000483871	0.152286	0.753367	0.698545	0.00415579	0.197429	0.138242	0.386306	0.655312	0.00698145	0.00802792	0	0	0	0	0	0	0	0	0	0	0
12255	C5orf41	0.000486866	0.178163	0.789878	0.971056	0.221847	0.14425	0.453673	5.5025e-05	0.886356	0.0190475	0.607598	0	0	0	0	0	0	1	0	0	0	1
15811	MAGED2	0.000487677	0.038699	0.141111	0.942699	0.000522611	0.53284	0.42319	0.408736	0.743259	0.0644772	0.0652276	0	0	0	1	0	0	0	0	0	0	1
7957	PMM2	0.000487925	0.921367	0.543416	0.876887	0.0233161	0.24692	0.864464	0.0258554	0.955914	5.90766e-05	0.0862548	0	0	0	0	0	0	0	0	1	0	1
25143	TRIM44	0.000487925	0.00193754	0.0594571	0.0267373	0.00651371	0.206974	0.961537	0.539898	0.689071	0.596687	0.655588	0	0	0	0	0	0	0	0	0	0	0
15714	ZNF746	0.000487925	0.905051	0.0451811	0.530384	0.843969	0.00306268	0.733818	0.597367	0.0896832	0.0171729	0.317182	0	0	0	0	0	0	0	0	0	0	0
13818	PVRL3	0.000487925	0.949765	0.0605166	0.120073	0.884563	0.00216665	0.104449	0.729767	0.869696	0.0138106	0.10261	0	0	0	0	0	0	0	0	0	0	0
9264	SNORA9	0.00048809	0.00463222	0.00580838	0.853226	0.00618481	0.836086	0.297696	0.727394	0.538005	0.903097	0.276976	0	0	0	0	0	0	0	0	0	0	0
36487	AZIN1	0.000488493	0.901505	0.277244	0.959448	0.258884	0.0375609	0.924078	0.316029	0.794127	0.000409573	0.445612	0	0	0	0	0	0	0	0	1	0	1
4960	PTK2	0.000488493	0.76757	0.0122374	0.826212	0.961411	0.00793582	0.992374	0.465932	0.57551	0.00023683	0.749494	0	0	0	0	0	0	0	0	1	0	1
26898	DERL1	0.000488493	0.105097	0.0688884	0.0650279	0.000148452	0.985864	0.741774	0.0710845	0.781971	0.0601258	0.924344	0	0	0	1	0	0	0	0	0	0	1
41022	SPCS3	0.000488936	0.00113035	0.00165923	0.10265	0.000220576	0.83697	0.964337	0.992073	0.989583	0.791981	0.908865	0	0	0	1	0	0	0	0	0	0	1
34545	EDEM2	0.000489839	0.0113729	0.0790249	0.107076	0.934993	0.459208	0.986318	0.00143006	0.821797	0.0233908	0.0775502	0	0	0	0	0	0	0	0	0	0	0
11457	Taf5	0.00049101	0.416179	0.429131	0.0359831	0.00153969	0.904961	0.327903	0.0130914	0.414527	0.00592082	0.926627	0	0	0	0	0	0	0	0	0	0	0
26277	purb	0.000495066	0.336645	0.282703	0.824579	0.292003	0.995244	0.382861	0.00103534	0.518816	0.000705358	0.894042	0	0	0	0	0	0	0	0	1	0	1
33691	PCCB	0.000498178	0.528922	0.916453	0.795607	0.00721559	0.174942	0.991604	0.0723606	0.800138	0.000232063	0.3723	0	0	0	0	0	0	0	0	1	0	1
14501	SND1	0.000499307	0.993328	0.903913	0.985413	0.0231816	0.796706	0.992872	0.00113009	0.977958	0.000208106	0.118155	0	0	0	0	0	0	0	0	1	0	1
10850	CJ013422	0.000499358	0.218508	0.141111	0.022963	0.786464	0.945846	0.396558	0.0220275	0.558627	0.00910943	0.00425328	0	0	0	0	0	0	0	0	0	0	0
9325	SLA-DRA	0.000503361	0.953084	0.195295	0.580299	0.00388087	0.0695725	0.713346	0.00022393	0.979444	0.0971414	0.464584	0	0	0	0	0	0	1	0	0	0	1
32678	PRKAB2	0.000503574	0.0721844	0.913597	0.937934	0.79649	0.000898753	0.465884	0.000576628	0.904661	0.906731	0.793589	0	0	0	0	1	0	1	0	0	0	2
21409	C16orf5	0.000508601	0.0241372	0.913597	0.925047	0.0530296	0.00220578	0.350244	0.585312	0.977958	0.0216261	0.402922	0	0	0	0	0	0	0	0	0	0	0
19926	DOK1	0.000511676	0.631977	0.725328	0.818403	0.153806	0.0581885	0.561307	0.00102962	0.975875	0.23583	0.75775	0	0	0	0	0	0	0	0	0	0	0
37743	MMAA	0.000514052	0.146848	0.923533	0.996337	0.468011	0.0172173	0.439267	7.37522e-05	0.968594	0.149986	0.713031	0	0	0	0	0	0	1	0	0	0	1
40480	JOSD1	0.000515969	0.000413861	0.147256	0.512558	0.391415	0.0366037	0.47407	0.00147821	0.991275	0.435925	0.815918	1	0	0	0	0	0	0	0	0	0	1
13501	VHLL	0.00052027	0.586098	0.790918	0.984395	0.027912	0.732931	0.825841	0.000203492	0.91063	0.000813874	0.264915	0	0	0	0	0	0	1	0	1	0	2
1623	ISCA1	0.000523534	0.300505	0.000597548	0.14531	0.0110277	0.0211439	0.725186	0.251266	0.893457	0.340525	0.953313	0	1	0	0	0	0	0	0	0	0	1
34138	RNASET2	0.000523571	0.401201	0.567974	0.929843	0.151398	0.00589479	0.568381	0.000202146	0.920051	0.449065	0.593684	0	0	0	0	0	0	1	0	0	0	1
22286	Fip1l1	0.000525637	0.967103	0.631798	0.757742	0.0501421	0.535358	0.791326	0.00987164	0.638153	0.0002668	0.667564	0	0	0	0	0	0	0	0	1	0	1
15553	AKAP12	0.000529071	0.203085	0.00257824	0.341327	0.000777723	0.0953169	0.963917	0.0359103	0.817105	0.746702	0.539774	0	0	0	1	0	0	0	0	0	0	1
38369	BX667494	0.000529888	0.648312	0.912947	0.898394	0.0129016	0.25457	0.971837	0.0529935	0.870684	0.000393274	0.279358	0	0	0	0	0	0	0	0	1	0	1
21010	TC270932	0.000532911	0.703921	0.216261	0.693384	0.156263	0.000990696	0.448997	0.0012076	0.939533	0.952192	0.884746	0	0	0	0	1	0	0	0	0	0	1
28124	COX15	0.000532911	0.312326	0.332199	0.815014	0.610071	0.000195743	0.906532	0.00615506	0.520972	0.50062	0.468889	0	0	0	0	1	0	0	0	0	0	1
2787	CN162100	0.000537559	0.977538	0.971881	0.869179	0.00994483	0.996998	0.903938	0.0015332	0.886357	0.000876205	0.311165	0	0	0	0	0	0	0	0	1	0	1
16458	CN158669	0.000539526	0.456358	0.339408	0.672742	0.186739	0.00331665	0.994886	0.00131621	0.4108	0.910257	0.10348	0	0	0	0	0	0	0	0	0	0	0
13209	BTRC	0.000541098	0.638221	0.799064	0.955577	0.0197792	0.0841376	0.924078	0.0423462	0.863791	4.89266e-05	0.20213	0	0	0	0	0	0	0	0	1	0	1
18474	DN111033	0.000541098	0.914561	0.00318735	0.507833	0.715973	0.00235781	0.701574	0.898448	0.776735	0.00171754	0.608019	0	0	0	0	0	0	0	0	0	0	0
8702	TC278343	0.000541098	0.917218	0.787258	0.81244	0.00357468	0.868604	0.935049	0.00124536	0.953169	0.00240141	0.255141	0	0	0	0	0	0	0	0	0	0	0
28436	LTA4H	0.000541098	0.8356	0.406144	0.318182	0.173989	0.0375311	0.567408	0.0108165	0.145963	0.732414	0.0103082	0	0	0	0	0	0	0	0	0	0	0
41733	CD86	0.000541758	0.703824	0.198891	0.00117408	0.0569038	0.285459	0.00584551	0.0708832	0.128048	0.536701	0.0802707	0	0	0	0	0	0	0	0	0	0	0
23011	EHD1	0.000543038	0.996466	0.00741737	0.114428	0.0854033	0.00195178	0.155591	0.0499903	0.970432	0.281107	0.608019	0	0	0	0	0	0	0	0	0	0	0
15227	AK237224	0.000543444	0.241013	0.00268521	0.0287716	0.309898	0.124386	0.423699	0.715249	0.894472	0.0200203	0.126482	0	0	0	0	0	0	0	0	0	0	0
8001	SLC35D2	0.0005439	0.578017	0.00217201	0.436682	0.355416	0.0048067	0.860862	0.921743	0.754345	0.00926318	0.807626	0	0	0	0	0	0	0	0	0	0	0
19786	TMEM41B	0.000549257	0.91775	0.0361699	0.00997804	0.256515	0.0187777	0.0238941	0.307939	0.624613	0.244737	0.0748056	0	0	0	0	0	0	0	0	0	0	0
23210	FOXO3	0.000552955	0.797445	0.0942933	0.457593	0.469592	0.119488	0.755704	0.0951337	0.978679	0.000220551	0.10261	0	0	0	0	0	0	0	0	1	0	1
34500	pmp22	0.000555331	0.00285254	0.48891	0.606411	0.0255348	0.000485256	0.434461	0.303158	0.941019	0.0587081	0.649313	0	0	0	0	1	0	0	0	0	0	1
20569	KBTBD11	0.000555594	0.513963	0.719794	0.92417	0.0436221	0.729785	0.919742	0.000223818	0.975802	0.000914184	0.1625	0	0	0	0	0	0	1	0	1	0	2
3985	C12orf4	0.000556464	0.480644	0.796601	0.141062	0.318256	0.0264143	0.0125358	0.00133076	0.46071	0.401682	0.443361	0	0	0	0	0	0	0	0	0	0	0
37571	SNX17	0.000557946	0.015771	0.00190808	0.205255	0.471121	0.767275	0.992143	0.0352264	0.91964	0.00513961	0.395239	0	0	0	0	0	0	0	0	0	0	0
36943	TPM3	0.000558313	0.843309	0.1594	0.946771	0.0847724	0.00257599	0.86721	0.00135179	0.723294	0.853606	0.416302	0	0	0	0	0	0	0	0	0	0	0
12678	PAPOLB	0.000560039	0.564565	0.214137	0.186373	0.000424712	0.619671	0.615057	0.00476918	0.812191	0.0295385	0.800823	0	0	0	1	0	0	0	0	0	0	1
7388	BRD4	0.000562835	0.221837	0.786463	0.487174	0.00860198	0.270324	0.0838462	0.39113	0.533828	0.0127248	0.00393097	0	0	0	0	0	0	0	0	0	0	0
24445	SLC1A3	0.000563862	0.308954	0.550688	0.598107	0.000694555	0.578949	0.994336	0.017559	0.919693	0.0011103	0.274002	0	0	0	1	0	0	0	0	0	0	1
1710	TC280442	0.000564504	0.0113887	0.281448	0.998503	0.840115	0.144125	0.194176	0.000204036	0.75784	0.044704	0.93392	0	0	0	0	0	0	1	0	0	0	1
10365	SVIL	0.000564974	0.218053	0.910259	0.769518	0.00320695	0.124011	0.906532	0.200664	0.883512	0.000847006	0.316824	0	0	0	0	0	0	0	0	1	0	1
24755	Ttyh3	0.000566701	0.985629	0.151518	0.693384	0.00132999	0.079858	0.785184	0.000392946	0.923878	0.133742	0.360633	0	0	0	0	0	0	1	0	0	0	1
24512	PTGFRN	0.000569529	0.986636	0.185143	0.829751	0.0054204	0.0488059	0.876088	0.000421773	0.845096	0.193719	0.268191	0	0	0	0	0	0	1	0	0	0	1
34892	MAGED2	0.000569529	0.0721844	0.114553	0.742329	0.000201922	0.766797	0.766311	0.113715	0.858965	0.0300308	0.118155	0	0	0	1	0	0	0	0	0	0	1
16100	CCL25	0.000569529	0.0139991	0.508438	0.625451	0.00213295	0.027528	0.67107	0.86535	0.945215	0.00870973	0.385074	0	0	0	0	0	0	0	0	0	0	0
5569	AJ956511	0.00057083	0.0888871	0.949905	0.739816	0.00661353	0.0193631	0.80039	0.61388	0.841449	0.00105626	0.410516	0	0	0	0	0	0	0	0	0	0	0
29566	RNF144B	0.000572249	0.716279	0.501233	0.998665	0.0481523	0.0221775	0.89116	0.000103222	0.810841	0.160793	0.212283	0	0	0	0	0	0	1	0	0	0	1
11663	ZNF271	0.000573361	0.0191989	0.263143	0.00227885	0.263669	0.217471	0.434344	0.120319	0.181674	0.866533	0.0208507	0	0	0	0	0	0	0	0	0	0	0
872	CCM2	0.000574018	0.016982	0.00132057	0.121205	9.98486e-05	0.682801	0.981562	0.369756	0.965402	0.697491	0.817599	0	0	0	1	0	0	0	0	0	0	1
9608	FTH1	0.000574018	0.000200686	0.232098	0.35119	0.035174	0.0105045	0.605708	0.0551736	0.906937	0.558782	0.991945	1	0	0	0	0	0	0	0	0	0	1
21281	MAP4	0.000579272	0.601281	0.596613	0.646807	0.129682	0.0271852	0.346897	0.443415	0.924946	0.000884495	0.0552405	0	0	0	0	0	0	0	0	1	0	1
26588	DISP1	0.000593132	0.33654	0.735693	0.821242	0.00341171	0.419858	0.380823	0.0957082	0.745461	0.00370173	0.0124694	0	0	0	0	0	0	0	0	0	0	0
27613	CK449475	0.000595407	0.000733639	0.0507211	0.931388	0.250518	0.160326	0.118051	0.00812496	0.655312	0.325887	0.754053	1	0	0	0	0	0	0	0	0	0	1
39739	PAP7	0.000596017	0.320733	0.975383	0.511194	0.0038371	0.127578	0.984749	0.115395	0.691047	0.000323269	0.606085	0	0	0	0	0	0	0	0	1	0	1
13747	SAR1B	0.000596355	0.953619	0.0631461	0.423442	0.940315	0.00111271	0.412472	0.982299	0.962073	0.0023996	0.270192	0	0	0	0	0	0	0	0	0	0	0
32490	ARRB2	0.000598743	0.640815	0.199432	0.65965	0.000884772	0.448395	0.95956	0.00212632	0.949732	0.0351251	0.258055	0	0	0	1	0	0	0	0	0	0	1
39287	SBNO1	0.000599485	0.00146324	0.0977069	0.817976	0.389033	0.0901228	0.224868	0.00300886	0.796571	0.312696	0.95153	0	0	0	0	0	0	0	0	0	0	0
3919	TPM3	0.00060009	0.47943	0.496298	0.741995	0.265927	0.00347614	0.992143	0.00109598	0.538005	0.778523	0.161573	0	0	0	0	0	0	0	0	0	0	0
42739	C14orf43	0.000602702	0.73238	0.380908	0.876473	0.0479699	0.0426595	0.994336	0.168346	0.651785	4.52577e-05	0.535191	0	0	0	0	0	0	0	0	1	0	1
28331	ZNF250	0.000605484	0.484809	0.169533	0.466986	0.000388425	0.633491	0.915972	0.00688417	0.989259	0.0377904	0.426407	0	0	0	1	0	0	0	0	0	0	1
13132	TC283994	0.000606532	0.0675852	0.00329624	0.156469	0.715645	0.498753	0.93368	0.0548553	0.975786	0.00180095	0.200533	0	0	0	0	0	0	0	0	0	0	0
36357	TC276747	0.000611627	0.943962	0.945155	0.956272	0.0151095	0.977679	0.993667	0.000810272	0.983912	0.000651576	0.0861996	0	0	0	0	0	0	1	0	1	0	2
26737	TSPAN7	0.000611751	0.0835968	0.32122	0.303411	0.764804	0.309128	0.998986	0.000394465	0.840908	0.0208765	0.101352	0	0	0	0	0	0	1	0	0	0	1
18081	PLAC8L1	0.000614793	0.0564253	0.189552	0.845836	0.777622	0.410166	0.561362	0.000191813	0.827722	0.0069296	0.630134	0	0	0	0	0	0	1	0	0	0	1
5257	COPB2	0.000614793	0.00890609	0.219077	0.00217466	0.0162162	0.169032	0.506734	0.652789	0.2101	0.395183	0.158533	0	0	0	0	0	0	0	0	0	0	0
34176	SQRDL	0.000616166	0.0216508	0.0294798	0.00165798	0.00859448	0.757422	0.398235	0.979176	0.409699	0.712702	0.254081	0	0	0	0	0	0	0	0	0	0	0
4458	DNAJC1	0.000617692	0.149614	0.0985066	0.083638	0.000111301	0.965815	0.728548	0.0395402	0.782031	0.0357311	0.880139	0	0	0	1	0	0	0	0	0	0	1
13225	U2SURP	0.000617724	0.753484	0.0782364	0.791408	0.433153	0.00304876	0.659668	0.851425	0.812191	0.000223778	0.354851	0	0	0	0	0	0	0	0	1	0	1
44212	EW094744	0.000617724	0.366431	0.00596781	0.281325	0.00119253	0.0495125	0.845561	0.00858798	0.903974	0.571075	0.633011	0	0	0	0	0	0	0	0	0	0	0
10180	HCST	0.000620998	0.994343	0.13774	0.57261	0.00182673	0.0582258	0.665928	0.0004075	0.969695	0.180486	0.518741	0	0	0	0	0	0	1	0	0	0	1
25964	PRDM4	0.000620998	0.994343	0.0609425	0.566807	0.436674	0.00479721	0.658037	0.270705	0.0902272	0.165428	0.135028	0	0	0	0	0	0	0	0	0	0	0
19943	Tm9sf2	0.000622155	0.362186	0.000921057	0.29714	0.232374	0.013757	0.859476	0.997211	0.796571	0.0121205	0.741907	0	1	0	0	0	0	0	0	0	0	1
5734	EIF4E3	0.000625538	0.841661	0.00444137	0.347053	0.130173	0.00142783	0.609254	0.173741	0.849454	0.129109	0.900251	0	0	0	0	0	0	0	0	0	0	0
5923	ACYP1	0.000625538	0.0788703	0.962369	0.769782	0.0245571	0.00347614	0.739607	0.926433	0.800138	0.00142986	0.520109	0	0	0	0	0	0	0	0	0	0	0
17181	FAM189A1	0.000638671	0.95376	0.082446	0.862218	0.607389	0.00338962	0.86721	0.610066	0.733918	0.000249789	0.532065	0	0	0	0	0	0	0	0	1	0	1
6345	ADHFE1	0.000640049	0.978943	0.916239	0.878454	0.0113269	0.799557	0.911795	0.000445723	0.946851	0.00161267	0.251094	0	0	0	0	0	0	1	0	0	0	1
29433	ARHGEF10L	0.000640328	0.484809	0.0740453	0.347053	0.000147706	0.402068	0.827749	0.00465283	0.987284	0.0743433	0.530063	0	0	0	1	0	0	0	0	0	0	1
27229	CTSW	0.000640719	0.0185167	0.00644579	0.193906	6.6538e-05	0.934985	0.994336	0.278375	0.975402	0.303918	0.632406	0	0	0	1	0	0	0	0	0	0	1
21200	TC280810	0.000642972	0.458185	0.898476	0.441858	0.143186	0.350451	0.917085	0.000543372	0.702325	0.0208583	0.0243904	0	0	0	0	0	0	1	0	0	0	1
26854	BX914656	0.000642972	0.00676529	0.862891	0.945019	0.210634	0.00127464	0.0711285	0.0589481	0.890313	0.245065	0.385326	0	0	0	0	0	0	0	0	0	0	0
21338	INSM1	0.000642972	0.132423	0.00110486	0.004744	0.0044606	0.100934	0.274318	0.276858	0.797073	0.742323	0.496548	0	0	0	0	0	0	0	0	0	0	0
12946	TMEM47	0.000644368	0.992428	0.145654	0.0661125	0.591725	0.0709141	0.091669	0.542897	0.704788	0.00281469	0.0070709	0	0	0	0	0	0	0	0	0	0	0
34670	EW594716	0.000645466	0.100369	0.00117288	0.545441	0.00030338	0.241458	0.95656	0.155102	0.693039	0.910461	0.368971	0	0	0	1	0	0	0	0	0	0	1
38269	DLG5	0.00064595	0.172953	0.0519812	0.0426903	0.000128091	0.778469	0.561307	0.0442039	0.754345	0.0981206	0.997733	0	0	0	1	0	0	0	0	0	0	1
3109	DAB2IP	0.000647695	0.958395	0.522615	0.105954	0.005861	0.295452	0.114499	0.00101631	0.56199	0.0437952	0.905435	0	0	0	0	0	0	0	0	0	0	0
40227	DNASE1L1	0.000647695	0.976886	0.985539	0.998665	0.0119001	0.979742	0.994357	0.0020049	0.995799	0.00139252	0.14086	0	0	0	0	0	0	0	0	0	0	0
22661	FOLR1	0.000647934	0.745285	0.417914	0.942615	0.0374811	0.0217031	0.811417	0.000171361	0.858605	0.213982	0.311595	0	0	0	0	0	0	1	0	0	0	1
10649	ARID2	0.000649032	0.957095	0.987806	0.699782	0.0197617	0.903983	0.71976	0.00831067	0.796571	0.00261589	0.0200072	0	0	0	0	0	0	0	0	0	0	0
22570	GOSR2	0.000656736	0.925599	0.480985	0.0748518	0.00867906	0.425515	0.132002	0.00265714	0.518816	0.0458506	0.85863	0	0	0	0	0	0	0	0	0	0	0
3419	HERPUD1	0.000659254	0.144032	0.0189737	0.650542	0.799677	0.596758	0.940881	0.0109615	0.797341	0.000318047	0.41459	0	0	0	0	0	0	0	0	1	0	1
29109	PPP1CB	0.000660089	0.809469	0.0241048	0.787831	0.880949	0.0101184	0.964337	0.393615	0.675479	0.000242165	0.616724	0	0	0	0	0	0	0	0	1	0	1
5024	SLC16A1	0.000663009	0.0707617	0.00146262	0.426003	0.34377	0.316252	0.965208	0.234753	0.75784	0.00816035	0.783228	0	0	0	0	0	0	0	0	0	0	0
16760	PADI2	0.000670837	0.14958	0.0023181	0.795129	0.000700389	0.206706	0.837713	0.136941	0.533913	0.913758	0.18443	0	0	0	1	0	0	0	0	0	0	1
25894	PHF14	0.000671685	0.439554	0.859921	0.610658	0.00251699	0.309407	0.991795	0.0182715	0.808392	0.000210386	0.370896	0	0	0	0	0	0	0	0	1	0	1
17784	TC260623	0.000672324	0.44106	0.383357	0.275867	0.32086	0.00792241	0.0583551	0.96036	0.799925	0.00421764	0.02643	0	0	0	0	0	0	0	0	0	0	0
30148	TC274667	0.000672344	0.303146	0.00505148	0.200298	0.000903296	0.065081	0.809804	0.0104452	0.94149	0.5451	0.711179	0	0	0	1	0	0	0	0	0	0	1
33762	UBE3A	0.000676435	0.855987	0.43906	0.754298	0.000802362	0.5655	0.930905	0.00104143	0.989583	0.0105008	0.238711	0	0	0	1	0	0	0	0	0	0	1
22629	CD68	0.000677007	0.077572	0.879224	0.203249	0.679239	0.0321182	0.964565	0.000789432	0.518816	0.347907	0.0508015	0	0	0	0	0	0	1	0	0	0	1
17118	U6	0.000677007	0.983027	0.977981	0.96818	0.00529992	0.940375	0.97772	0.00210688	0.981119	0.000587513	0.0803347	0	0	0	0	0	0	0	0	1	0	1
42521	SMUG1	0.000677007	0.0822447	0.91643	0.517998	0.082076	0.0325396	0.0313274	0.805766	0.616072	0.0584064	0.0241365	0	0	0	0	0	0	0	0	0	0	0
3943	EW646915	0.000677007	0.0376682	0.651952	0.237669	0.00313339	0.015533	0.991615	0.596403	0.655312	0.00165879	0.805082	0	0	0	0	0	0	0	0	0	0	0
43407	SLC13A4	0.000677751	0.1945	0.000989923	0.35119	0.00049792	0.10534	0.95956	0.0911186	0.800138	0.994099	0.641458	0	1	0	1	0	0	0	0	0	0	2
16437	SNRNP48	0.000677751	0.425143	0.131013	0.938819	0.00196291	0.629213	0.628265	0.0424176	0.53837	0.166471	0.0289335	0	0	0	0	0	0	0	0	0	0	0
5067	TC287559	0.000677751	0.406506	0.0593456	0.0462769	0.972531	0.363488	0.383509	0.113191	0.75784	0.00437737	0.01883	0	0	0	0	0	0	0	0	0	0	0
25811	COPG2	0.000678568	0.000761366	0.00285423	0.13961	0.0446633	0.560212	0.854272	0.0753929	0.961236	0.307272	0.831063	1	0	0	0	0	0	0	0	0	0	1
18558	TC249926	0.000681106	0.153527	0.798373	0.292836	0.22014	0.0108056	0.0156011	0.678957	0.645728	0.0307076	0.0186822	0	0	0	0	0	0	0	0	0	0	0
27439	COL8A1	0.000681132	0.662955	0.566894	0.999272	0.0851538	0.0206994	0.860862	0.000181742	0.836132	0.207075	0.282574	0	0	0	0	0	0	1	0	0	0	1
16520	SGMS1	0.000685647	0.0191989	0.000879935	0.0810887	0.000178935	0.53825	0.961537	0.20347	0.969804	0.594245	0.798406	0	1	0	1	0	0	0	0	0	0	2
15596	CK451290	0.000687085	0.203207	0.026276	0.40229	0.000256832	0.466018	0.989329	0.0127	0.918613	0.119114	0.344052	0	0	0	1	0	0	0	0	0	0	1
15412	AK238322	0.000687311	0.896701	0.954003	0.969119	0.00477143	0.711358	0.938751	0.00603178	0.989583	0.000337778	0.0775502	0	0	0	0	0	0	0	0	1	0	1
41182	ARL4C	0.00068983	0.919845	0.194265	0.965474	0.0316168	0.0165496	0.938468	0.00103534	0.736038	0.486062	0.256043	0	0	0	0	0	0	0	0	0	0	0
33703	CREBBP	0.000690264	0.898762	0.908043	0.834028	0.0179092	0.955627	0.958334	0.00150497	0.922866	0.00118359	0.0551531	0	0	0	0	0	0	0	0	0	0	0
33737	CCDC100	0.000700247	0.36516	0.364694	0.557203	0.609711	0.000512148	0.134158	0.494787	0.962073	0.0129632	0.204521	0	0	0	0	1	0	0	0	0	0	1
11221	TRAK1	0.000705625	0.781974	0.00572565	0.642802	0.341027	0.00170607	0.896301	0.583795	0.675041	0.028637	0.96913	0	0	0	0	0	0	0	0	0	0	0
41516	C16orf5	0.000705785	0.318266	0.962816	0.884162	0.0606679	0.112875	0.871723	6.40819e-05	0.893457	0.0309439	0.154896	0	0	0	0	0	0	1	0	0	0	1
37276	COASY	0.000706409	0.987476	0.601591	0.796957	0.00516703	0.388178	0.844451	0.000525969	0.991275	0.0164528	0.319535	0	0	0	0	0	0	1	0	0	0	1
7463	THRA	0.000707472	0.00310341	0.121486	0.0203535	0.034076	0.140226	0.914978	0.267415	0.562248	0.787727	0.381057	0	0	0	0	0	0	0	0	0	0	0
37622	PURG	0.00071217	0.263345	0.026276	0.698545	0.888535	0.380256	0.95956	0.0321913	0.77223	0.000600184	0.51762	0	0	0	0	0	0	0	0	1	0	1
28309	RPS12	0.000715551	0.00146848	0.0236804	0.698545	0.000515219	0.378282	0.409723	0.941763	0.790856	0.384528	0.271066	0	0	0	1	0	0	0	0	0	0	1
24090	DN126130	0.000719401	0.00800917	0.355415	0.924372	0.607229	0.0383021	0.0578522	0.00380328	0.655312	0.539373	0.648159	0	0	0	0	0	0	0	0	0	0	0
36545	TC241859	0.000724955	0.0594909	0.223678	0.958672	0.000798095	0.483163	0.453673	0.349555	0.775609	0.0410624	0.0652276	0	0	0	1	0	0	0	0	0	0	1
27785	TXNIP	0.000729582	0.564766	0.483881	0.210249	0.000437946	0.972237	0.647949	0.00704578	0.719686	0.00502625	0.800823	0	0	0	1	0	0	0	0	0	0	1
40676	AJ945959	0.000729616	0.745285	0.0185573	0.81244	0.00830203	0.0177897	0.992143	0.0096763	0.638153	0.872328	0.298271	0	0	0	0	0	0	0	0	0	0	0
31324	TC269690	0.00073629	0.000184811	0.00417532	0.325726	0.00100184	0.182865	0.47308	0.560963	0.854631	0.627404	0.558826	1	0	0	0	0	0	0	0	0	0	1
33298	GP1BB	0.000742894	0.00463222	0.346753	0.920566	0.274214	0.0286939	0.0435313	0.0237533	0.655312	0.980364	0.400858	0	0	0	0	0	0	0	0	0	0	0
29035	CARNS1	0.000747187	0.914218	0.964665	0.920274	0.00755763	0.761491	0.992143	0.00543972	0.920051	0.000530809	0.220211	0	0	0	0	0	0	0	0	1	0	1
42338	EW412840	0.000747531	0.72937	0.11763	0.190861	0.800457	0.000972292	0.0718922	0.238241	0.883399	0.0669014	0.206341	0	0	0	0	1	0	0	0	0	0	1
29567	ZEB1	0.000749285	0.196066	0.276334	0.868923	0.425707	0.769541	0.77195	0.000300489	0.858605	0.00139252	0.415009	0	0	0	0	0	0	1	0	0	0	1
34117	B2M	0.00075045	0.979502	0.946699	0.9036	0.00618481	0.956366	0.93368	0.00143146	0.900582	0.00044889	0.250381	0	0	0	0	0	0	0	0	1	0	1
22741	ACTB	0.000755513	0.718135	0.0152809	0.761519	0.00881654	0.0160298	0.979257	0.0114769	0.659575	0.916156	0.36145	0	0	0	0	0	0	0	0	0	0	0
21933	MGPD	0.000758562	0.988101	0.523215	0.70719	0.101796	0.327674	0.790276	0.0291529	0.977958	0.000335729	0.0652589	0	0	0	0	0	0	0	0	1	0	1
31118	PBX1	0.000760992	0.0164155	0.164096	0.00948389	0.000892645	0.332129	0.670184	0.747627	0.431429	0.0928729	0.648984	0	0	0	1	0	0	0	0	0	0	1
45103	TMBIM6	0.000760992	0.974232	0.784683	0.940922	0.00394358	0.631321	0.97772	0.000783131	0.859636	0.0055252	0.055095	0	0	0	0	0	0	1	0	0	0	1
18507	AY609776	0.000763961	0.00166947	0.185403	0.93874	0.0311982	0.0698346	0.0414759	0.215673	0.584817	0.619767	0.148868	0	0	0	0	0	0	0	0	0	0	0
3265	HSPH1	0.000768495	0.0775547	0.299241	0.481189	0.000248941	0.383556	0.943934	0.102968	0.950993	0.00391467	0.303174	0	0	0	1	0	0	0	0	0	0	1
38940	C18orf25	0.000769063	0.677359	0.761567	0.998503	0.025022	0.112875	0.870973	0.0673602	0.914902	0.000129297	0.166846	0	0	0	0	0	0	0	0	1	0	1
5886	LPHN2	0.000769063	0.926151	0.991119	0.734595	0.0420613	0.847785	0.870583	0.00170222	0.810097	0.00409333	0.0323131	0	0	0	0	0	0	0	0	0	0	0
10648	WDFY3	0.000769267	0.440336	0.925012	0.0689284	0.360922	0.321959	0.436354	0.00758183	0.240629	0.145607	0.0028868	0	0	0	0	0	0	0	0	0	0	0
29911	CDC42BPA	0.00077222	0.61668	0.740045	0.758932	0.0486919	0.102579	0.495715	0.000278078	0.939209	0.0828535	0.666342	0	0	0	0	0	0	1	0	0	0	1
41094	MAMLD1	0.000773402	0.0126412	0.00058442	0.602465	0.00542392	0.60513	0.704282	0.946882	0.57551	0.459938	0.577276	0	1	0	0	0	0	0	0	0	0	1
10959	LONRF3	0.000776814	0.000580304	0.00472104	0.220257	0.000288685	0.332893	0.70615	0.983028	0.922234	0.361167	0.560698	1	0	0	1	0	0	0	0	0	0	2
19434	RHOH	0.000779432	0.741351	0.0185694	0.413414	0.00545143	0.0181289	0.750323	0.00561858	0.890804	0.763655	0.690768	0	0	0	0	0	0	0	0	0	0	0
28818	CILP	0.000783928	0.785787	0.339555	0.893058	0.000585241	0.552078	0.996796	0.0018646	0.885726	0.0182354	0.113705	0	0	0	1	0	0	0	0	0	0	1
35135	PDXK	0.000788763	0.12254	0.540281	0.668	0.381715	0.303007	0.904004	0.000271838	0.953008	0.0167106	0.198688	0	0	0	0	0	0	1	0	0	0	1
39334	BTBD16	0.000788763	0.900959	0.91814	0.519295	0.00246597	0.94633	0.723894	0.00274546	0.745585	0.000860845	0.607598	0	0	0	0	0	0	0	0	1	0	1
22094	CTSS	0.000788763	0.808336	0.124836	0.994797	0.00448012	0.163002	0.941329	0.0062166	0.635971	0.271718	0.0871123	0	0	0	0	0	0	0	0	0	0	0
28849	TLK1	0.000791464	0.342916	0.852565	0.218591	0.218245	0.0374638	0.0217095	0.987351	0.541692	0.0309255	0.00798527	0	0	0	0	0	0	0	0	0	0	0
44160	Ccdc80	0.000792349	0.914659	0.122326	0.357185	0.0811939	0.00308719	0.288991	0.00272894	0.970484	0.924473	0.98058	0	0	0	0	0	0	0	0	0	0	0
31769	MSRB2	0.000805287	0.0647349	0.0222104	0.602465	0.000435495	0.88707	0.844576	0.141297	0.798542	0.202899	0.219831	0	0	0	1	0	0	0	0	0	0	1
11432	COQ3	0.000805287	0.00202227	0.24393	0.461324	0.00100262	0.0523628	0.68064	0.895463	0.953389	0.0549835	0.57484	0	0	0	0	0	0	0	0	0	0	0
27689	LGALS3	0.000813746	0.758823	0.695892	0.73012	0.0741837	0.100769	0.956487	0.000543509	0.631109	0.110376	0.0495004	0	0	0	0	0	0	1	0	0	0	1
40129	EDNRB	0.000814074	0.685701	0.233323	0.331249	0.125195	0.00363631	0.133877	0.00181275	0.900932	0.895874	0.889149	0	0	0	0	0	0	0	0	0	0	0
31395	CSTF2T	0.000815191	0.0250084	0.456037	0.331021	0.904654	0.034549	0.933068	0.000875518	0.800138	0.294621	0.282183	0	0	0	0	0	0	1	0	0	0	1
27218	PINX1	0.000822904	0.17812	0.803146	0.701	0.0489989	0.0147555	0.165194	0.876998	0.887572	0.00226392	0.0486212	0	0	0	0	0	0	0	0	0	0	0
18449	SSC.93769	0.000823427	0.556245	0.786902	0.666178	0.00323852	0.579219	0.984264	0.00593345	0.865521	0.000370188	0.315918	0	0	0	0	0	0	0	0	1	0	1
7250	TIMP2	0.000824372	0.260178	0.620282	0.838267	0.290092	0.404132	0.854872	0.000254382	0.989583	0.00885414	0.277605	0	0	0	0	0	0	1	0	0	0	1
7081	NPC1	0.000824372	0.0241372	0.019919	0.0316418	0.000125155	0.89442	0.834499	0.156666	0.796571	0.0877191	0.936026	0	0	0	1	0	0	0	0	0	0	1
33223	B4galt5	0.000824401	0.0033032	0.595009	0.757742	0.186321	0.000813755	0.30754	0.0262562	0.980253	0.449296	0.860275	0	0	0	0	1	0	0	0	0	0	1
16005	USP30	0.000826167	0.827592	0.0828544	0.793883	0.626701	0.0606095	0.961537	0.175123	0.794127	0.000349205	0.445612	0	0	0	0	0	0	0	0	1	0	1
27866	TC240786	0.000828978	0.944398	0.405208	0.797226	0.0116322	0.271516	0.796723	0.00205969	0.543878	0.0792451	0.0193823	0	0	0	0	0	0	0	0	0	0	0
19455	FAM49A	0.000829715	0.617593	0.0504644	0.0825433	0.953252	0.15131	0.360657	0.302556	0.82834	0.00369308	0.0349386	0	0	0	0	0	0	0	0	0	0	0
8653	CEBPB	0.000834095	0.791288	0.0609425	0.274732	0.659244	0.0589574	0.560032	0.173585	0.979071	0.00028443	0.0657827	0	0	0	0	0	0	0	0	1	0	1
41357	HNRNPUL2	0.000834447	0.565064	0.385966	0.41707	0.262752	0.867468	0.851245	0.00235761	0.887733	0.000704995	0.0349936	0	0	0	0	0	0	0	0	1	0	1
9444	VAMP4	0.000837232	0.101959	0.103839	0.0254383	0.000361476	0.904851	0.589788	0.0995747	0.614014	0.0500298	0.948616	0	0	0	1	0	0	0	0	0	0	1
10696	CALCOCO2	0.000837232	0.00140852	0.00410426	0.025656	0.00110468	0.717935	0.95956	0.822675	0.854747	0.9124	0.801088	0	0	0	0	0	0	0	0	0	0	0
28795	EV961479	0.000840364	0.836948	0.235505	0.791408	0.0914473	0.00886826	0.686733	0.00231732	0.896158	0.745205	0.691965	0	0	0	0	0	0	0	0	0	0	0
3609	TGFBI	0.000841346	0.956163	0.209164	0.702266	0.0226046	0.0240257	0.713346	0.000644033	0.931204	0.332288	0.555307	0	0	0	0	0	0	1	0	0	0	1
26347	SGK1	0.000841828	0.00552321	0.000271477	0.0368457	0.00491667	0.649042	0.960474	0.858866	0.989435	0.435174	0.831647	0	1	0	0	0	0	0	0	0	0	1
32365	IPMK	0.000843051	0.812764	0.853562	0.937546	0.0166623	0.911606	0.859476	0.00063912	0.886357	0.000675369	0.298856	0	0	0	0	0	0	1	0	1	0	2
16752	FUNDC2	0.000843119	0.171884	0.850253	0.724802	0.00597389	0.0765158	0.89116	0.282168	0.87916	0.00134233	0.37094	0	0	0	0	0	0	0	0	0	0	0
13834	SLA-DRA	0.000843408	0.916708	0.237747	0.376878	0.00430773	0.134638	0.555283	0.000484456	0.923306	0.0760154	0.699128	0	0	0	0	0	0	1	0	0	0	1
8831	mRpL9	0.000844632	0.988882	0.372569	0.976601	0.0547606	0.21138	0.993667	0.0315399	0.758261	5.63595e-05	0.370646	0	0	0	0	0	0	0	0	1	0	1
34796	TC261044	0.000847665	0.0826543	0.0708493	0.1807	0.984547	0.942345	0.952679	0.00715029	0.913606	0.00795914	0.104763	0	0	0	0	0	0	0	0	0	0	0
27201	AGRN	0.000859875	0.016511	0.00250815	0.05175	0.145582	0.796953	0.90011	0.217689	0.944655	0.0719592	0.318907	0	0	0	0	0	0	0	0	0	0	0
38658	ALDH2	0.000861175	0.955964	0.124761	0.967382	0.00864816	0.0593493	0.963494	0.00292882	0.558627	0.408157	0.0814689	0	0	0	0	0	0	0	0	0	0	0
16270	TC276744	0.000869567	0.145492	0.259621	0.41707	0.919179	0.718695	0.0287843	0.0143564	0.168243	0.0492711	0.376391	0	0	0	0	0	0	0	0	0	0	0
20033	MEF2C	0.000873951	0.755876	0.448319	0.846837	0.0162907	0.0690745	0.994336	0.000370903	0.654237	0.148427	0.0586384	0	0	0	0	0	0	1	0	0	0	1
7096	Mafb	0.000874279	0.616549	0.226056	0.0559008	0.00332873	0.484324	0.256759	0.00346582	0.588128	0.0436188	0.943648	0	0	0	0	0	0	0	0	0	0	0
13972	TNRC6B	0.000876052	0.121889	0.0445424	0.211016	0.000210091	0.846025	0.945683	0.0364093	0.967112	0.0691064	0.583826	0	0	0	1	0	0	0	0	0	0	1
32507	KLF11	0.000876052	0.910796	0.574347	0.734589	0.0743638	0.187898	0.700622	0.0602076	0.975786	0.000271859	0.0586384	0	0	0	0	0	0	0	0	1	0	1
3402	TC287104	0.00087946	0.0600026	0.00485652	0.180828	0.00059135	0.59927	0.963917	0.321801	0.969203	0.731976	0.840744	0	0	0	1	0	0	0	0	0	0	1
28639	PIGK	0.000879901	0.277182	0.000727125	0.43653	0.420566	0.0483875	0.964383	0.634829	0.736083	0.00268072	0.721774	0	1	0	0	0	0	0	0	0	0	1
16019	RIOK1	0.000879901	0.772473	0.177745	0.868923	0.321377	0.241384	0.734474	0.0269597	0.484551	0.000157123	0.854453	0	0	0	0	0	0	0	0	1	0	1
43954	BX923220	0.000883138	0.0764004	0.0129734	0.00466613	0.009416	0.712473	0.376271	0.742826	0.635971	0.986511	0.344147	0	0	0	0	0	0	0	0	0	0	0
28308	NEXN	0.000883138	0.216501	0.164744	0.500753	0.511937	0.985035	0.997024	0.00328858	0.999645	0.0016783	0.143742	0	0	0	0	0	0	0	0	0	0	0
28089	CK462660	0.000884101	0.221995	0.568057	0.992153	0.267977	0.00052659	0.581882	0.746868	0.82834	0.00404503	0.567787	0	0	0	0	1	0	0	0	0	0	1
24480	COX11	0.000884101	0.142085	0.0123861	0.309165	0.931253	0.481381	0.97114	0.0410032	0.937645	0.00142712	0.248824	0	0	0	0	0	0	0	0	0	0	0
36272	Plxna2	0.000890581	0.927661	0.670291	0.966621	0.016301	0.287611	0.946029	0.000425758	0.922091	0.0253829	0.189301	0	0	0	0	0	0	1	0	0	0	1
32622	SLC35A1	0.000890723	0.831233	0.881572	0.991175	0.00220261	0.903542	0.957772	0.00491026	0.968933	0.00113746	0.0855485	0	0	0	0	0	0	0	0	0	0	0
43492	CK467614	0.000892001	0.177155	0.0285789	0.00149608	0.0060039	0.617762	0.110257	0.404726	0.419586	0.817887	0.193685	0	0	0	0	0	0	0	0	0	0	0
28637	AK233472	0.000892001	0.0624109	0.662061	0.137456	0.932076	0.0366655	0.949805	0.00104143	0.533828	0.311347	0.0605435	0	0	0	0	0	0	0	0	0	0	0
4429	NARS2	0.000899245	0.608351	0.999854	0.417415	0.0235788	0.302963	0.832417	0.0782863	0.57551	0.0016563	0.866651	0	0	0	0	0	0	0	0	0	0	0
30234	Alkbh5	0.00089926	0.609449	0.0180156	0.51776	0.957105	0.020771	0.894571	0.333721	0.82834	0.000675369	0.453527	0	0	0	0	0	0	0	0	1	0	1
14800	B4GALT1	0.00089926	0.17135	0.767311	0.695907	0.553572	0.00338962	0.914978	0.00120613	0.649901	0.856067	0.292496	0	0	0	0	0	0	0	0	0	0	0
8878	KIF1C	0.000900829	0.757439	0.00151059	0.824456	0.0605171	0.00466447	0.991615	0.186219	0.499488	0.145411	0.649313	0	0	0	0	0	0	0	0	0	0	0
30097	MPND	0.00090184	0.0266216	0.0150759	0.10265	7.89249e-05	0.995258	0.941979	0.254964	0.922632	0.213332	0.847825	0	0	0	1	0	0	0	0	0	0	1
3732	PCK2	0.000901927	0.484809	0.110513	0.115481	0.000684889	0.414378	0.537602	0.00234408	0.812191	0.0442319	0.849025	0	0	0	1	0	0	0	0	0	0	1
9081	Itsn2	0.000901927	0.964289	0.0926666	0.0886804	0.96778	0.0111335	0.0879691	0.898046	0.796571	0.0173891	0.053602	0	0	0	0	0	0	0	0	0	0	0
34477	DYNLL1	0.000902229	0.930029	0.71145	0.976074	0.00985116	0.685435	0.957058	0.000426969	0.855409	0.00336689	0.0586384	0	0	0	0	0	0	1	0	0	0	1
32644	GLRX3	0.000905288	0.347353	0.226871	0.971559	0.575183	0.000311666	0.764434	0.01169	0.654976	0.369387	0.729795	0	0	0	0	1	0	0	0	0	0	1
11844	PPP2R2A	0.000905292	0.941394	0.52935	0.774997	0.13893	0.463649	0.89116	0.0314248	0.999645	0.000966487	0.12009	0	0	0	0	0	0	0	0	1	0	1
19873	EIF3I	0.000905292	0.914307	0.508725	0.225373	0.00751995	0.487679	0.387806	0.00243973	0.720766	0.0330558	0.9397	0	0	0	0	0	0	0	0	0	0	0
22728	BTC	0.000905984	0.782358	0.241681	0.961481	0.250438	0.0093928	0.965208	0.498729	0.635971	0.000224053	0.659053	0	0	0	0	0	0	0	0	1	0	1
24298	RICTOR	0.000910729	0.00551975	0.153511	0.701	0.000717574	0.062829	0.422538	0.786295	0.903974	0.0226944	0.167843	0	0	0	1	0	0	0	0	0	0	1
27304	ICAM-1	0.000915777	0.842235	0.0806294	0.862603	0.311132	0.000440454	0.771334	0.0286507	0.731597	0.372299	0.844692	0	0	0	0	1	0	0	0	0	0	1
38110	NUDT12	0.000915777	0.842305	0.0197421	0.29714	0.70269	0.00317592	0.522181	0.96012	0.957059	0.00833289	0.393842	0	0	0	0	0	0	0	0	0	0	0
981	SLC39A7	0.000915907	0.789882	0.0054407	0.526031	0.0287884	0.00519139	0.81669	0.0499264	0.771046	0.520644	0.825737	0	0	0	0	0	0	0	0	0	0	0
40710	BTC	0.000925334	0.260606	0.989363	0.161973	0.0150672	0.0735136	0.782574	0.389008	0.317683	0.0016783	0.938812	0	0	0	0	0	0	0	0	0	0	0
16383	TC266037	0.000931105	0.911601	0.137925	0.1724	0.620626	0.0669056	0.303908	0.285586	0.84789	0.00118657	0.0282721	0	0	0	0	0	0	0	0	0	0	0
35590	TTN	0.000934803	0.901081	0.65535	0.600056	0.006481	0.675674	0.78442	0.000286414	0.883512	0.00257991	0.458122	0	0	0	0	0	0	1	0	0	0	1
28391	TC250909	0.000942171	0.00346407	0.00801034	0.0573465	0.0945789	0.6764	0.993667	0.0991994	0.907765	0.276315	0.449007	0	0	0	0	0	0	0	0	0	0	0
27714	CA779668	0.000949351	0.0653889	0.087741	0.0049882	0.166968	0.761491	0.407722	0.46124	0.42124	0.706477	0.084582	0	0	0	0	0	0	0	0	0	0	0
43210	MBD2	0.000953447	0.110929	0.0501274	0.237669	0.897489	0.905939	0.961537	0.00676546	0.970484	0.00229895	0.114002	0	0	0	0	0	0	0	0	0	0	0
9973	FPGT	0.000956606	0.420867	0.0281981	0.010376	0.481828	0.157803	0.146779	0.747871	0.641235	0.0574007	0.0376503	0	0	0	0	0	0	0	0	0	0	0
39678	pdxK	0.000957477	0.701779	0.768858	0.543398	0.104231	0.87666	0.870808	0.00225231	0.814711	0.00395918	0.0306439	0	0	0	0	0	0	0	0	0	0	0
34512	BRCC36	0.000959111	0.26527	0.576553	0.926368	0.170358	0.000991345	0.751572	0.988367	0.75925	0.00124381	0.607988	0	0	0	0	1	0	0	0	0	0	1
7779	TNRC6B	0.000965369	0.291368	0.250041	0.360484	0.000158095	0.995164	0.924078	0.0195524	0.904661	0.0115435	0.516609	0	0	0	1	0	0	0	0	0	0	1
38389	HBS1L	0.000965943	0.93535	0.790918	0.87625	0.0152907	0.847028	0.876452	0.002331	0.810841	0.000289384	0.381633	0	0	0	0	0	0	0	0	1	0	1
41487	EEFSEC	0.000966764	0.0378968	0.979535	0.965474	0.319026	0.000994158	0.179751	0.126448	0.97753	0.141327	0.505996	0	0	0	0	1	0	0	0	0	0	1
36386	MTMR3	0.000966764	0.240912	0.964376	0.104852	0.0365707	0.0578317	0.697336	0.661447	0.228777	0.00531531	0.735673	0	0	0	0	0	0	0	0	0	0	0
16349	MOSPD1	0.000967761	0.0561583	0.00197946	0.00605128	0.034695	0.391157	0.458231	0.950883	0.790856	0.317053	0.261538	0	0	0	0	0	0	0	0	0	0	0
34284	PLN	0.000972351	0.212287	0.725883	0.882177	0.000802362	0.310706	0.810563	0.108849	0.995799	0.00145763	0.133594	0	0	0	1	0	0	0	0	0	0	1
38857	CD34	0.000973164	0.943204	0.349591	0.242159	0.00992346	0.179065	0.357551	0.00065853	0.796571	0.0640552	0.913153	0	0	0	0	0	0	1	0	0	0	1
10764	TC244520	0.000973164	0.443971	0.222993	0.190861	0.935345	0.00215549	0.0316204	0.285843	0.810841	0.0484508	0.100498	0	0	0	0	0	0	0	0	0	0	0
33282	ZBTB16	0.00097318	0.68383	0.881572	0.917014	0.0174291	0.303824	0.973136	0.000220673	0.882928	0.013529	0.0963381	0	0	0	0	0	0	1	0	0	0	1
9899	CNOT8	0.000977083	0.0264246	0.00731331	0.00322802	0.00923356	0.892375	0.456399	0.995079	0.635971	0.870222	0.272271	0	0	0	0	0	0	0	0	0	0	0
20912	AK3L1	0.000978646	0.0345886	0.357097	0.309921	0.979128	0.107241	0.961537	0.000558303	0.82834	0.104074	0.193645	0	0	0	0	0	0	1	0	0	0	1
27793	AK230922	0.000985532	0.038699	0.969202	0.760024	0.376283	0.00192922	0.0458068	0.0939753	0.800138	0.258025	0.248853	0	0	0	0	0	0	0	0	0	0	0
19453	FTSJ2	0.000987673	0.926151	0.455953	0.355724	0.00427831	0.381364	0.517912	0.000784252	0.821797	0.0233381	0.759384	0	0	0	0	0	0	1	0	0	0	1
29835	PAQR3	0.000989862	0.999967	0.146941	0.975762	0.332368	0.0542534	0.991158	0.253353	0.704788	0.0002668	0.574592	0	0	0	0	0	0	0	0	1	0	1
23335	ZNF148	0.000995162	0.695646	0.799064	0.977549	0.00144257	0.848743	0.929981	0.00899963	0.953395	0.001551	0.0844756	0	0	0	0	0	0	0	0	0	0	0
34098	BECN1	0.000996095	0.0875908	0.975241	0.748936	0.0574665	0.0123766	0.096229	0.926827	0.799718	0.0152377	0.0537516	0	0	0	0	0	0	0	0	0	0	0
12752	USP38	0.00100264	0.94103	0.796822	0.979357	0.0413126	0.428705	0.964702	0.00633511	0.945215	0.000155745	0.153526	0	0	0	0	0	0	0	0	1	0	1
40372	GLIPR2	0.00100264	0.874459	0.0973023	0.617097	0.363855	0.000535851	0.497019	0.0423462	0.906517	0.357025	0.948616	0	0	0	0	1	0	0	0	0	0	1
6969	ABHD4	0.00100839	0.101731	0.951824	0.982086	0.934187	0.000885754	0.320552	0.00193006	0.995799	0.996204	0.991945	0	0	0	0	1	0	0	0	0	0	1
7619	DNAJC30	0.00100887	0.620528	0.390172	0.591835	0.143187	0.0178872	0.930905	0.5391	0.374406	0.000418419	0.977051	0	0	0	0	0	0	0	0	1	0	1
238	MBNL1	0.00100887	0.947625	0.498046	0.988937	0.00406857	0.250314	0.993667	0.000516841	0.817105	0.0363664	0.0904799	0	0	0	0	0	0	1	0	0	0	1
5405	LONRF3	0.00101007	0.000630178	0.0381929	0.156416	0.00139206	0.0780007	0.811826	0.681538	0.936886	0.265165	0.856605	1	0	0	0	0	0	0	0	0	0	1
3431	ARL6IP6	0.0010206	0.930029	0.837784	0.698545	0.0180682	0.599678	0.700388	0.017578	0.866356	0.000655449	0.0236963	0	0	0	0	0	0	0	0	1	0	1
6113	UBTD1	0.00102661	0.000318303	0.00363417	0.153657	0.0530296	0.287248	0.75801	0.0261812	0.959206	0.327297	0.850433	1	0	0	0	0	0	0	0	0	0	1
39121	GCK	0.00102743	0.556944	0.962816	0.49802	0.00394005	0.292825	0.900093	0.0487854	0.647518	0.000290574	0.679764	0	0	0	0	0	0	0	0	1	0	1
31631	CALM1	0.00103217	0.408213	0.626153	0.530947	0.0014785	0.608704	0.974056	0.0124609	0.859256	0.000994046	0.390662	0	0	0	0	0	0	0	0	1	0	1
14167	KCNJ2	0.00103517	0.188779	0.653257	0.958095	0.398578	0.193426	0.630213	9.85982e-05	0.922256	0.0171729	0.532668	0	0	0	0	0	0	1	0	0	0	1
8533	CAST	0.00104025	0.649564	0.312513	0.786137	0.189036	0.0140097	0.566705	0.612217	0.939747	0.000443039	0.182048	0	0	0	0	0	0	0	0	1	0	1
20039	CS	0.00104364	0.343925	0.900495	0.943065	0.173702	0.221081	0.555283	0.000264618	0.903463	0.0289055	0.616879	0	0	0	0	0	0	1	0	0	0	1
26523	ES448046	0.00108287	0.590125	0.51051	0.233219	0.0976468	0.0403324	0.664913	0.474322	0.171519	0.000729599	0.794458	0	0	0	0	0	0	0	0	1	0	1
44647	Ap1s2	0.00109523	0.968049	0.0141397	0.551907	0.213106	0.00087026	0.676537	0.117526	0.797341	0.156212	0.977245	0	0	0	0	1	0	0	0	0	0	1
3632	KTI12	0.00110163	0.978813	0.287793	0.863444	0.00589799	0.104548	0.897832	0.000539955	0.878919	0.11625	0.250746	0	0	0	0	0	0	1	0	0	0	1
10508	GNPTAB	0.00111124	0.0668295	0.979726	0.781101	0.392676	0.0126083	0.753521	0.000131414	0.82834	0.317252	0.314482	0	0	0	0	0	0	1	0	0	0	1
17749	CS	0.00111391	0.174446	0.438678	0.707968	0.331525	0.574398	0.166929	0.000689827	0.526778	0.00692363	0.98471	0	0	0	0	0	0	1	0	0	0	1
32196	C13orf33	0.00111391	0.236255	0.334491	0.702266	0.476899	0.73724	0.937569	0.000550116	0.979071	0.00300611	0.244052	0	0	0	0	0	0	1	0	0	0	1
42836	Clic5	0.00111391	0.224561	0.251827	0.763322	0.970469	0.000270678	0.242984	0.0811118	0.931204	0.0705733	0.665965	0	0	0	0	1	0	0	0	0	0	1
3642	DN129888	0.00113311	0.951378	0.420795	0.469565	0.120533	0.354246	0.632043	0.0432754	0.901699	0.000465721	0.0284596	0	0	0	0	0	0	0	0	1	0	1
16872	STAG2	0.0011389	0.00397102	0.421845	0.8224	0.888867	0.0311888	0.362453	0.000511492	0.953389	0.317403	0.849057	0	0	0	0	0	0	1	0	0	0	1
43467	TC289568	0.00114302	0.328988	0.000528912	0.371487	0.00925682	0.0296968	0.919433	0.260579	0.761201	0.334177	0.889843	0	1	0	0	0	0	0	0	0	0	1
12852	ZNF398	0.0011521	0.359166	0.49531	0.564934	0.46068	0.000856747	0.993667	0.682628	0.370023	0.0098174	0.856322	0	0	0	0	1	0	0	0	0	0	1
9152	LSM6	0.00115633	0.100066	0.809446	0.860234	0.42475	0.0695725	0.692101	0.000171699	0.975402	0.0929307	0.426201	0	0	0	0	0	0	1	0	0	0	1
15352	CU407238.7	0.00117736	0.592095	0.711278	0.802733	0.0332299	0.107202	0.995909	0.000278078	0.729005	0.0813696	0.0659131	0	0	0	0	0	0	1	0	0	0	1
13290	DPF3	0.00118921	0.951953	0.673682	0.949063	0.0413178	0.62152	0.945319	0.00429754	0.81237	0.000194561	0.33466	0	0	0	0	0	0	0	0	1	0	1
12363	YPEL2	0.00120264	0.945498	0.510492	0.98378	0.0166336	0.149534	0.973136	0.000310941	0.840026	0.0513789	0.143742	0	0	0	0	0	0	1	0	0	0	1
40488	HSF2	0.00120511	0.497953	0.994983	0.955772	0.0120945	0.172106	0.677197	0.0691123	0.961169	0.00041081	0.0635908	0	0	0	0	0	0	0	0	1	0	1
34366	TC284776	0.00121183	0.201643	0.912174	0.466986	0.00814787	0.0514509	0.999153	0.248682	0.694462	0.000680761	0.667292	0	0	0	0	0	0	0	0	1	0	1
23830	DB788523	0.0012157	0.174629	0.717364	0.341199	0.495367	0.172988	0.973136	0.000607036	0.708391	0.0667459	0.0574209	0	0	0	0	0	0	1	0	0	0	1
3901	SNAPC1	0.00123379	0.752036	0.851147	0.871535	0.0489989	0.828481	0.996636	0.000855416	0.967467	0.00206741	0.10476	0	0	0	0	0	0	1	0	0	0	1
4460	TC288315	0.00124028	0.185513	0.80214	0.263787	0.0057339	0.0857849	0.93802	0.19332	0.57551	0.000990597	0.842793	0	0	0	0	0	0	0	0	1	0	1
605	HMOX1	0.00125078	0.118691	0.825221	0.956954	0.919416	0.000664225	0.526547	0.00403438	0.878733	0.811408	0.889642	0	0	0	0	1	0	0	0	0	0	1
13975	WDYHV1	0.00125458	0.914307	0.991828	0.725634	0.004396	0.853197	0.874712	0.00443736	0.810841	0.000679477	0.445113	0	0	0	0	0	0	0	0	1	0	1
44721	LDLRAD2	0.00126142	0.465383	0.439711	0.83858	0.0846952	0.00896745	0.49828	0.000288166	0.947224	0.471608	0.661131	0	0	0	0	0	0	1	0	0	0	1
2172	CH242-6J13.1	0.00126715	0.760872	0.203205	0.654279	0.245484	0.0155394	0.911795	0.582006	0.304247	0.000318047	0.987557	0	0	0	0	0	0	0	0	1	0	1
13148	BZW2	0.00127564	0.430468	0.872253	0.988937	0.0321132	0.057606	0.713346	0.279322	0.962913	0.000728942	0.175026	0	0	0	0	0	0	0	0	1	0	1
9320	TC255158	0.00128909	0.425622	0.0905102	0.973619	0.564081	0.000270678	0.702329	0.0294945	0.655312	0.157048	0.871503	0	0	0	0	1	0	0	0	0	0	1
7995	TC285749	0.00129285	0.957914	0.693513	0.929843	0.0137152	0.380938	0.936958	0.000514513	0.95602	0.0171175	0.215127	0	0	0	0	0	0	1	0	0	0	1
4778	RFC3	0.00131508	0.51892	0.707299	0.560338	0.0509733	0.0374096	0.956125	0.292965	0.518816	0.000365947	0.856605	0	0	0	0	0	0	0	0	1	0	1
43902	MSRA	0.00131747	0.317541	0.701757	0.735745	0.237641	0.0128425	0.262512	0.000606331	0.939877	0.494119	0.942538	0	0	0	0	0	0	1	0	0	0	1
31064	GLO1	0.00132029	0.802502	0.235569	0.957927	0.400521	0.00470358	0.973136	0.657485	0.599984	0.000517363	0.776221	0	0	0	0	0	0	0	0	1	0	1
28976	MRPL35	0.00132087	0.863439	0.757196	0.999901	0.0417987	0.292825	0.956296	0.044126	0.911759	0.000462682	0.229694	0	0	0	0	0	0	0	0	1	0	1
44506	PTMAP	0.00132534	0.669979	0.333396	0.782095	0.0922881	0.00667785	0.54834	0.000602013	0.94149	0.583818	0.71678	0	0	0	0	0	0	1	0	0	0	1
7390	ARHGEF10L	0.00133909	0.457625	0.382579	0.738265	0.191619	0.00646664	0.993667	0.87085	0.518816	0.000947398	0.920323	0	0	0	0	0	0	0	0	1	0	1
12942	TC302806	0.0013421	0.578667	0.742338	0.497993	0.0179307	0.115215	0.89267	0.146417	0.518816	0.000248792	0.849025	0	0	0	0	0	0	0	0	1	0	1
42669	TC258103	0.00136317	0.540282	0.226629	0.773509	0.882875	0.00052659	0.993667	0.393065	0.380524	0.0236237	0.798504	0	0	0	0	1	0	0	0	0	0	1
13328	DDOST	0.00138429	0.118868	0.00088519	0.356689	0.00260934	0.129587	0.994886	0.298636	0.768602	0.749441	0.715063	0	1	0	0	0	0	0	0	0	0	1
19189	CF362179	0.00138788	0.0419251	0.954923	0.82062	0.831962	0.00541315	0.604724	0.000613131	0.89212	0.67245	0.64101	0	0	0	0	0	0	1	0	0	0	1
29040	S100A6	0.00139322	0.794018	0.654117	0.945704	0.0705961	0.0849564	0.975042	0.000442111	0.797073	0.113042	0.164467	0	0	0	0	0	0	1	0	0	0	1
17859	PRKAB2	0.00142137	0.806527	0.123376	0.987196	0.390039	0.000708351	0.911795	0.0356662	0.612362	0.391124	0.674325	0	0	0	0	1	0	0	0	0	0	1
1459	TUBB6	0.00143025	0.652732	0.668735	0.981225	0.0938299	0.0492727	0.89267	0.00040626	0.850908	0.174073	0.273693	0	0	0	0	0	0	1	0	0	0	1
40626	TC292894	0.00145278	0.924457	0.69492	0.996452	0.0456201	0.316429	0.974393	0.0259055	0.892227	0.000257891	0.229345	0	0	0	0	0	0	0	0	1	0	1
20117	CST3	0.00147859	0.563019	0.996981	0.811497	0.0436769	0.364595	0.992872	0.000341452	0.863588	0.012773	0.0817932	0	0	0	0	0	0	1	0	0	0	1
26967	SLC9A6	0.00147961	0.721295	0.305716	0.945019	0.382031	0.00340814	0.957772	0.747627	0.635971	0.000812135	0.777999	0	0	0	0	0	0	0	0	1	0	1
36319	exoc1	0.00148979	0.432304	0.315937	0.8224	0.615818	0.000524478	0.422865	0.588662	0.908488	0.00877476	0.485486	0	0	0	0	1	0	0	0	0	0	1
10887	ITGA4	0.00149051	0.545416	0.823285	0.829542	0.0530306	0.632178	0.565324	0.000411205	0.796571	0.00309809	0.619209	0	0	0	0	0	0	1	0	0	0	1
34685	ZNF45	0.00149954	0.0966801	0.881572	0.554079	0.411896	0.0004355	0.914978	0.194686	0.57551	0.0847825	0.880051	0	0	0	0	1	0	0	0	0	0	1
4971	LGALS3	0.00149988	0.65269	0.775422	0.798515	0.119047	0.0836457	0.997738	0.000543372	0.728962	0.130214	0.104003	0	0	0	0	0	0	1	0	0	0	1
10661	TC248624	0.00150118	0.370952	0.410039	0.843697	0.636699	0.0004355	0.395971	0.0090539	0.92453	0.585486	0.986759	0	0	0	0	1	0	0	0	0	0	1
22993	TC266105	0.00150159	0.0441933	0.95025	0.967832	0.440963	0.000587984	0.343111	0.0728611	0.945468	0.192737	0.789838	0	0	0	0	1	0	0	0	0	0	1
16006	SPAST	0.00150682	0.264474	0.543868	0.932571	0.34108	0.000858971	0.450436	0.705799	0.909836	0.00698292	0.45583	0	0	0	0	1	0	0	0	0	0	1
25057	UST	0.00151375	0.341994	0.164318	0.925989	0.347824	0.824429	0.838481	0.00427456	0.779849	0.000515004	0.499526	0	0	0	0	0	0	0	0	1	0	1
29071	GRPEL1	0.00152292	0.971443	0.372542	0.871887	0.10396	0.262201	0.939734	0.0436498	0.908934	0.000204973	0.191337	0	0	0	0	0	0	0	0	1	0	1
6484	Zfp27	0.00153493	0.752223	0.996441	0.966569	0.016301	0.476685	0.844451	0.0190308	0.969804	0.000719511	0.0841106	0	0	0	0	0	0	0	0	1	0	1
17014	PSME4	0.00156766	0.0545548	0.000764591	0.199938	0.126877	0.271177	0.989842	0.511803	0.854541	0.0346014	0.741907	0	1	0	0	0	0	0	0	0	0	1
1197	zfr	0.00157436	0.793212	0.387857	0.925756	0.133422	0.586949	0.832741	0.0105121	0.693039	0.000349205	0.610854	0	0	0	0	0	0	0	0	1	0	1
9731	SIRT2	0.00160483	0.922513	0.142098	0.637129	0.319726	0.0296988	0.632043	0.4261	0.945215	0.000289902	0.155965	0	0	0	0	0	0	0	0	1	0	1
41854	SPATS2	0.00161416	0.741351	0.0155291	0.961312	0.97341	0.0374096	0.961537	0.514605	0.516271	0.000977933	0.92774	0	0	0	0	0	0	0	0	1	0	1
20684	IGF1R	0.00161416	0.109387	0.486369	0.805103	0.513789	0.319674	0.780236	0.000559094	0.979071	0.0250757	0.410109	0	0	0	0	0	0	1	0	0	0	1
22753	srgap2	0.00161416	0.939233	0.358967	0.352792	0.0387286	0.047909	0.30754	0.000737326	0.857611	0.218405	0.951358	0	0	0	0	0	0	1	0	0	0	1
30690	EW548701	0.00164727	0.218795	0.386945	0.950729	0.253498	0.726522	0.728548	0.000591813	0.857972	0.0023915	0.462923	0	0	0	0	0	0	1	0	0	0	1
10601	TC250148	0.00167166	0.691148	0.368762	0.906399	0.117728	0.707806	0.757659	0.00561918	0.66173	0.000298813	0.641503	0	0	0	0	0	0	0	0	1	0	1
12632	MPI	0.00168904	0.438996	0.862505	0.45689	0.0481523	0.0395057	0.935834	0.316029	0.518816	0.000796977	0.905153	0	0	0	0	0	0	0	0	1	0	1
37764	PTRH2	0.00169337	0.959229	0.320905	0.968395	0.220592	0.124011	0.964337	0.0437785	0.676698	0.000131076	0.573842	0	0	0	0	0	0	0	0	1	0	1
37496	TC283198	0.00169764	0.591719	0.693513	0.938819	0.0616584	0.860813	0.74482	0.000833532	0.822348	0.00131907	0.473985	0	0	0	0	0	0	1	0	0	0	1
7070	LUC7L3	0.00169976	0.944398	0.182773	0.654727	0.49812	0.0184116	0.658505	0.5098	0.943086	0.000865681	0.219351	0	0	0	0	0	0	0	0	1	0	1
29620	YWHAQ	0.00170137	0.989041	0.707445	0.756172	0.0117473	0.529589	0.829434	0.000616524	0.947336	0.00946503	0.402717	0	0	0	0	0	0	1	0	0	0	1
33342	CAPN3	0.00170574	0.172953	0.88474	0.555202	0.449107	0.0727412	0.973736	0.000460304	0.776031	0.143256	0.139677	0	0	0	0	0	0	1	0	0	0	1
42167	IKBKAP	0.00170843	0.187039	0.000932268	0.612796	0.071964	0.0475695	0.957058	0.883297	0.558627	0.0953925	0.837043	0	1	0	0	0	0	0	0	0	0	1
19530	BRAP	0.00173831	0.887971	0.412252	0.767308	0.150728	0.0669891	0.924078	0.171638	0.527706	0.000285336	0.832671	0	0	0	0	0	0	0	0	1	0	1
31154	SMOX	0.00175287	0.597118	0.415073	0.802395	0.125884	0.872619	0.997024	0.00332116	0.966376	0.000546684	0.155143	0	0	0	0	0	0	0	0	1	0	1
38499	SCARNA16	0.00175612	0.0443618	0.428639	0.656886	0.813789	0.124011	0.765713	0.000317725	0.983042	0.0679977	0.41459	0	0	0	0	0	0	1	0	0	0	1
37893	CLIC2	0.00176304	0.0703368	0.896058	0.808187	0.826536	0.00818033	0.670529	0.000574128	0.909118	0.50984	0.607011	0	0	0	0	0	0	1	0	0	0	1
40417	DNPEP	0.00177728	0.0498466	0.000634432	0.44911	0.0865821	0.246713	0.914978	0.629996	0.655312	0.0563929	0.976119	0	1	0	0	0	0	0	0	0	0	1
22522	BE241031	0.00181109	0.934392	0.285468	0.624432	0.299228	0.0457218	0.614385	0.282392	0.992247	0.000551539	0.113913	0	0	0	0	0	0	0	0	1	0	1
6367	RALGAPA2	0.00181109	0.0449793	0.000358613	0.0615464	0.00531322	0.179677	0.861952	0.674261	0.96425	0.50025	0.911971	0	1	0	0	0	0	0	0	0	0	1
44438	ACTR3	0.0018217	0.805365	0.355736	0.530384	0.0149984	0.0545844	0.410245	0.000496671	0.947319	0.209647	0.798406	0	0	0	0	0	0	1	0	0	0	1
39955	LGALS3	0.00186353	0.742617	0.777048	0.837261	0.0931636	0.129587	0.996459	0.000604005	0.761201	0.088176	0.107098	0	0	0	0	0	0	1	0	0	0	1
6257	AXL	0.00190819	0.968049	0.613698	0.654727	0.0209381	0.270283	0.68064	0.000452869	0.922632	0.0289119	0.586825	0	0	0	0	0	0	1	0	0	0	1
26372	RFC4	0.00193886	0.0795426	0.718134	0.973619	0.417964	0.106286	0.475915	0.000179454	0.936397	0.0624754	0.641012	0	0	0	0	0	0	1	0	0	0	1
6812	KERA	0.00194583	0.815841	0.994389	0.986261	0.0652977	0.608071	0.950064	0.00090691	0.989583	0.0085352	0.235676	0	0	0	0	0	0	1	0	0	0	1
40391	Fam119a	0.00202443	0.368448	0.991119	0.410301	0.0168043	0.0953169	0.93802	0.189366	0.57551	0.000913233	0.831063	0	0	0	0	0	0	0	0	1	0	1
20346	AIF1	0.0020431	0.89564	0.343225	0.946035	0.00894457	0.0911147	0.913428	0.000642983	0.841449	0.153604	0.230458	0	0	0	0	0	0	1	0	0	0	1
23438	TC268977	0.00210521	0.479227	0.695892	0.7881	0.049305	0.0570652	0.456399	0.420764	0.966869	0.000902004	0.0775502	0	0	0	0	0	0	0	0	1	0	1
6900	C13orf33	0.00221186	0.244749	0.668925	0.865455	0.400521	0.272872	0.811417	0.000291347	0.989435	0.0212343	0.381633	0	0	0	0	0	0	1	0	0	0	1
32934	FAM162A	0.00226474	0.714679	0.518073	0.882048	0.100849	0.0356553	0.990973	0.243272	0.693039	0.000244834	0.582677	0	0	0	0	0	0	0	0	1	0	1
24332	RAG1AP1	0.00227417	0.187376	0.96394	0.849685	0.529418	0.0123444	0.782088	0.000544971	0.862108	0.423224	0.462508	0	0	0	0	0	0	1	0	0	0	1
25787	CN161576	0.0023377	0.485152	0.229285	0.967889	0.861369	0.0004355	0.83568	0.0969337	0.635971	0.126866	0.87983	0	0	0	0	1	0	0	0	0	0	1
33201	ITM2C	0.00233916	0.691148	0.632278	0.721017	0.0895854	0.0468327	0.472424	0.000427522	0.951403	0.181988	0.77344	0	0	0	0	0	0	1	0	0	0	1
27431	NDUFAF6	0.00240489	0.212618	0.912569	0.967832	0.506847	0.0467195	0.630213	0.000421195	0.995799	0.172456	0.641458	0	0	0	0	0	0	1	0	0	0	1
10132	AKTIP	0.00241834	0.947428	0.0920497	0.8999	0.593514	0.0110953	0.904893	0.667665	0.731429	0.000680761	0.603537	0	0	0	0	0	0	0	0	1	0	1
12564	TC266450	0.00242728	0.677359	0.79086	0.876473	0.113488	0.0872836	0.676537	0.000362313	0.988574	0.0970312	0.582598	0	0	0	0	0	0	1	0	0	0	1
32200	TC253915	0.00244878	0.936845	0.605752	0.771489	0.138068	0.526015	0.890795	0.0132415	0.983114	0.000680761	0.100937	0	0	0	0	0	0	0	0	1	0	1
37842	TC240977	0.00246395	0.531692	0.867795	0.875974	0.0669946	0.55241	0.95956	0.000576628	0.96425	0.00676922	0.155965	0	0	0	0	0	0	1	0	0	0	1
21018	PDGFD	0.00246937	0.891932	0.540281	0.745586	0.0351766	0.111277	0.68064	0.000576628	0.988024	0.103873	0.581862	0	0	0	0	0	0	1	0	0	0	1
18985	KLHDC2	0.00249714	0.477445	0.795148	0.543398	0.22297	0.473076	0.961087	0.000692659	0.798542	0.0135946	0.0563732	0	0	0	0	0	0	1	0	0	0	1
43044	CLN5	0.0025091	0.0413869	0.553909	0.760024	0.882875	0.078643	0.676537	0.000873501	0.989435	0.189902	0.592445	0	0	0	0	0	0	1	0	0	0	1
41093	UBE2B	0.0025663	0.592095	0.73725	0.838821	0.045423	0.0645776	0.984001	0.184658	0.754345	0.000331706	0.509115	0	0	0	0	0	0	0	0	1	0	1
44293	TC281942	0.0025704	0.781088	0.720483	0.973298	0.0491929	0.133852	0.954482	0.0651511	0.858605	0.000223072	0.280184	0	0	0	0	0	0	0	0	1	0	1
30736	YPEL5	0.00261273	0.328194	0.367696	0.922007	0.637064	0.000917737	0.818645	0.419022	0.659575	0.0206124	0.954945	0	0	0	0	1	0	0	0	0	0	1
37119	fam189a2	0.00261713	0.823298	0.286227	0.9714	0.327562	0.0123063	0.893649	0.516953	0.775006	0.000568599	0.519762	0	0	0	0	0	0	0	0	1	0	1
12778	BLOC1S4	0.00262074	0.0113729	0.000972993	0.529045	0.0121222	0.725519	0.777914	0.772694	0.693066	0.373811	0.777999	0	1	0	0	0	0	0	0	0	0	1
24828	STT3A	0.00265231	0.88467	0.509674	0.526999	0.111173	0.169449	0.466211	0.182258	0.899437	0.000966487	0.0376697	0	0	0	0	0	0	0	0	1	0	1
13833	AGBL3	0.00269687	0.0606049	0.9207	0.663831	0.458572	0.000771085	0.793572	0.0988218	0.708391	0.171132	0.923552	0	0	0	0	1	0	0	0	0	0	1
44267	HTRA3	0.00275018	0.186161	0.711504	0.976601	0.423742	0.197238	0.60055	0.000411205	0.922091	0.0443438	0.625522	0	0	0	0	0	0	1	0	0	0	1
33947	TC266364	0.00276257	0.887971	0.926256	0.894562	0.0460249	0.551061	0.83853	0.000746483	0.95139	0.00996691	0.40236	0	0	0	0	0	0	1	0	0	0	1
9979	RFESD	0.00277	0.436907	0.895298	0.984062	0.15206	0.310799	0.782574	0.000369164	0.977958	0.0199125	0.391903	0	0	0	0	0	0	1	0	0	0	1
36458	ST3GAL4	0.0028136	0.13489	0.893188	0.914821	0.647845	0.0356838	0.279628	0.000845312	0.871438	0.303355	0.960737	0	0	0	0	0	0	1	0	0	0	1
27505	IGIP	0.00281395	0.789974	0.912595	0.98939	0.0205522	0.422253	0.914978	0.0408311	0.978476	0.000979287	0.160069	0	0	0	0	0	0	0	0	1	0	1
1132	TGFB1	0.00284369	0.30718	0.789086	0.884374	0.13434	0.0366655	0.865012	0.00032145	0.816844	0.233719	0.245455	0	0	0	0	0	0	1	0	0	0	1
34209	FMNL3	0.00297218	0.910796	0.0835808	0.802395	0.505536	0.000909237	0.754124	0.146558	0.783422	0.166783	0.992013	0	0	0	0	1	0	0	0	0	0	1
11431	CLDN5	0.00298407	0.244412	0.850764	0.824579	0.442141	0.119616	0.273239	0.000587563	0.790856	0.0961437	0.954479	0	0	0	0	0	0	1	0	0	0	1
42201	SARNP	0.00307925	0.995029	0.727922	0.997814	0.0356592	0.625447	0.999504	0.0146118	0.91031	0.000645704	0.250129	0	0	0	0	0	0	0	0	1	0	1
25008	BX916545	0.00317673	0.4853	0.936046	0.993483	0.170358	0.0974408	0.780734	0.000292776	0.969695	0.0817234	0.413937	0	0	0	0	0	0	1	0	0	0	1
36157	SESN1	0.00318749	0.373243	0.926782	0.867593	0.316645	0.037455	0.885845	0.000495718	0.850473	0.220538	0.317679	0	0	0	0	0	0	1	0	0	0	1
9246	C10orf54	0.00320892	0.555947	0.843175	0.897334	0.100899	0.118608	0.947623	0.000576628	0.840026	0.103808	0.188815	0	0	0	0	0	0	1	0	0	0	1
37246	H1FX	0.00321752	0.887971	0.609155	0.956272	0.0877523	0.177355	0.993667	0.0883519	0.797341	0.000505593	0.442274	0	0	0	0	0	0	0	0	1	0	1
23365	TC289877	0.00327824	0.888932	0.589128	0.987481	0.0604657	0.707333	0.956824	0.00875823	0.84781	0.000537447	0.355015	0	0	0	0	0	0	0	0	1	0	1
6607	EYA1	0.00331614	0.647237	0.902399	0.65484	0.0121716	0.510606	0.956824	0.0173675	0.810841	0.000973593	0.50089	0	0	0	0	0	0	0	0	1	0	1
23226	GTF3C4	0.00340561	0.561273	0.284696	0.584451	0.896054	0.000885754	0.249149	0.14778	0.991275	0.142368	0.571239	0	0	0	0	1	0	0	0	0	0	1
9064	CD81	0.00345751	0.826552	0.550182	0.994797	0.0253094	0.132105	0.950986	0.000916622	0.840026	0.121633	0.199929	0	0	0	0	0	0	1	0	0	0	1
22623	WHAMM	0.00357217	0.943962	0.440689	0.885628	0.097641	0.404114	0.96318	0.0320927	0.921364	0.000387643	0.204521	0	0	0	0	0	0	0	0	1	0	1
41087	FOLR1	0.00358539	0.859034	0.546259	0.911604	0.0358756	0.111344	0.844396	0.000745635	0.929261	0.125146	0.367002	0	0	0	0	0	0	1	0	0	0	1
39645	AK237373	0.00397021	0.104096	0.946005	0.882019	0.45593	0.0385945	0.686733	0.000435834	0.937073	0.250231	0.499858	0	0	0	0	0	0	1	0	0	0	1
29196	pdgfra	0.00417501	0.643712	0.657404	0.963752	0.133926	0.0416444	0.781714	0.000853204	0.921002	0.269681	0.491191	0	0	0	0	0	0	1	0	0	0	1
42741	KCNJ2	0.00420864	0.276792	0.712456	0.95508	0.436267	0.263799	0.473103	0.000570317	0.827722	0.0348482	0.804336	0	0	0	0	0	0	1	0	0	0	1
8318	HIPK2	0.00425607	0.706852	0.936785	0.82408	0.108013	0.551419	0.629415	0.000641244	0.822348	0.00894944	0.660703	0	0	0	0	0	0	1	0	0	0	1
39812	E2F6	0.00443164	0.837883	0.388109	0.807083	0.223503	0.049478	0.963847	0.376545	0.558627	0.000961723	0.870949	0	0	0	0	0	0	0	0	1	0	1
37749	GALM	0.00447586	0.718511	0.624089	0.784994	0.0584694	0.0952975	0.610611	0.00097298	0.983912	0.173321	0.664982	0	0	0	0	0	0	1	0	0	0	1
19658	FBXO28	0.00455076	0.70126	0.460857	0.876887	0.11829	0.0557579	0.723841	0.397588	0.933377	0.000721978	0.219002	0	0	0	0	0	0	0	0	1	0	1
4137	GNG10	0.00459458	0.77632	0.38503	0.969119	0.200846	0.028137	0.868279	0.407749	0.817105	0.000558472	0.408497	0	0	0	0	0	0	0	0	1	0	1
17270	PRKG1	0.00459458	0.676919	0.763338	0.955082	0.102033	0.0898121	0.782574	0.000459181	0.964586	0.112376	0.445855	0	0	0	0	0	0	1	0	0	0	1
34005	skap2	0.00473752	0.482912	0.925198	0.801618	0.2386	0.0891451	0.42319	0.000825406	0.889632	0.152415	0.864307	0	0	0	0	0	0	1	0	0	0	1
26214	GHR	0.00473759	0.172953	0.962816	0.739413	0.325201	0.0431099	0.907868	0.000624686	0.796571	0.276195	0.235413	0	0	0	0	0	0	1	0	0	0	1
27014	PHLPP1	0.0048463	0.969697	0.111692	0.913303	0.46667	0.0351932	0.934176	0.491841	0.75784	0.000630989	0.558361	0	0	0	0	0	0	0	0	1	0	1
22554	ATP2B2	0.00487239	0.747212	0.747651	0.986371	0.0688748	0.120527	0.882324	0.110337	0.920051	0.000518576	0.237178	0	0	0	0	0	0	0	0	1	0	1
8997	ZFAND5	0.0052346	0.885237	0.124639	0.440559	0.642038	0.0595228	0.672499	0.234724	0.995799	0.000840316	0.13793	0	0	0	0	0	0	0	0	1	0	1
12864	WHAMM	0.0054325	0.962353	0.151041	0.896217	0.358149	0.096504	0.95956	0.234498	0.796571	0.000490233	0.454203	0	0	0	0	0	0	0	0	1	0	1
23266	Rprd1a	0.00555009	0.951953	0.279678	0.812174	0.389288	0.0350061	0.813751	0.306388	0.901869	0.000714233	0.297879	0	0	0	0	0	0	0	0	1	0	1
7695	UBE2G1	0.00605821	0.815841	0.527903	0.896194	0.19548	0.0447597	0.788225	0.261827	0.931308	0.000756451	0.248824	0	0	0	0	0	0	0	0	1	0	1
20582	CYB5A	0.00637172	0.68383	0.238213	0.788711	0.506301	0.39838	0.993667	0.0260856	0.897972	0.000959764	0.342615	0	0	0	0	0	0	0	0	1	0	1
26548	MAP2K7	0.00648398	0.631977	0.761103	0.973298	0.0913891	0.0572566	0.893649	0.238506	0.866444	0.000858809	0.367935	0	0	0	0	0	0	0	0	1	0	1
10091	PM20D1	0.00742217	0.149103	0.851371	0.708943	0.413508	0.127578	0.913135	0.000947493	0.869023	0.131114	0.255413	0	0	0	0	0	0	1	0	0	0	1
Total													164	232	46	640	292	12	702	0	732	67
